# Supplementary material for: Extracellular Vesicles From the Cotton Pathogen Fusarium oxysporum f. sp. vasinfectum Induce a Phytotoxic Response in Plants
Source: Front Plant Sci. 2020 Jan 10;10:1610. doi: 10.3389/fpls.2019.01610 (PMC6965325; doi:10.3389/fpls.2019.01610)
Supplement: Table S1 — Full list of proteins in EVs. [file Table_1.xlsx]

## Sheet: Sheet1
				EV1A			EV2A			EV3A
				Peptide_count	Spectral_count	NSpC	Peptide_count	Spectral_count	NSpC	Peptide_count	Spectral_count	NSpC	number of reps detected in
FOTG_08633	EXM24125	uncharacterized protein FPRN_01006	-	5	60	147.777	2	38	63.0547	2	24	80.3692	3
FOTG_10608	EXM21679	related to tripeptidyl-peptidase i	F:serine-type endopeptidase activity; P:proteolysis	22	45	111.185	9	16	27.6144	22	38	125.49	3
FOTG_02405	EXM33907	frequency clock protein	C:nucleus; C:cytoplasm; P:regulation of transcription, DNA-templated; P:circadian rhythm	7	23	57.9901	5	24	40.4729	3	20	67.5515	3
FOTG_03632	EXM32021	glucose-regulated protein	C:Golgi apparatus; C:nuclear membrane; C:luminal surveillance complex; F:ATP binding; F:ATPase activity; F:unfolded protein binding; P:karyogamy involved in conjugation with cellular fusion; P:SRP-dependent cotranslational protein targeting to membrane, translocation; P:response to unfolded protein; P:ER-associated ubiquitin-dependent protein catabolic process; P:posttranslational protein targeti…	11	22	55.5854	10	11	19.5945	16	26	86.7903	3
FOTG_15292	EXM16413	related to period clock protein frq	C:nucleus; C:cytoplasm; P:regulation of transcription, DNA-templated; P:circadian rhythm	4	20	50.7796	2	21	35.6471	4	21	70.7528	3
FOTG_07604	EXM25889	uncharacterized protein FMAN_05927	-	7	24	60.3959	7	29	48.5262	1	11	38.8303	2
FOTG_05803	EXM28573	protein disulfide-isomerase	C:endoplasmic reticulum; F:protein disulfide isomerase activity; F:FMN binding; F:oxidoreductase activity; P:cell redox homeostasis; P:oxidation-reduction process	6	11	29.2101	11	20	34.0395	16	23	77.1617	3
FOTG_06653	EXM27334	uncharacterized protein FFUJ_09664	-	4	22	55.5854	5	19	32.4324	5	11	38.8303	3
FOTG_03515	EXM31837	related to csf1 protein	C:integral component of membrane; P:fermentation	7	23	57.9901	7	21	35.6471	4	9	32.4701	3
FOTG_12971	EXM18981	cerevisin	F:serine-type endopeptidase activity; P:proteolysis	6	20	50.7796	5	6	11.5875	9	16	54.7663	3
FOTG_02417	EXM33929	transcription initiation factor tfiid subunit 12	C:SAGA complex; C:transcription factor TFIID complex; C:SLIK (SAGA-like) complex; F:RNA polymerase II activating transcription factor binding; F:chromatin binding; F:translation initiation factor activity; F:TBP-class protein binding; F:protein complex scaffold; F:identical protein binding; F:protein heterodimerization activity; P:regulation of transcription from RNA polymerase II promoter; P:his…	2	3	10.1148	4	35	58.2072	5	13	45.1986	3
FOTG_15593	EXM16120	related to cell wall protein	-	9	23	57.9901	9	16	27.6144	4	6	22.9449	3
FOTG_06397	EXM26950	related to glu asp-trna amidotransferase subunit a	F:transferase activity; F:carbon-nitrogen ligase activity, with glutamine as amido-N-donor	3	4	12.4978	4	4	8.3883	16	25	83.5788	3
FOTG_11173	EXM21071	related to oxidoreductase	-	7	11	29.2101	8	12	21.1975	10	14	48.3858	3
FOTG_10869	EXM21345	qi74 protein	F:oxidoreductase activity, acting on CH-OH group of donors; F:flavin adenine dinucleotide binding; P:oxidation-reduction process	2	22	55.5854	6	18	30.8259	1	2	10.2726	2
FOTG_08528	EXM24551	acetyl- carboxylase	F:acetyl-CoA carboxylase activity; F:biotin carboxylase activity; F:ATP binding; F:metal ion binding; P:fatty acid biosynthetic process; P:pyruvate metabolic process; C:biotin carboxylase complex	0	0	2.9728	9	12	21.1975	17	21	70.7528	2
FOTG_13424	EXM18486	polyketide synthase	F:oxidoreductase activity; F:transferase activity; F:phosphopantetheine binding; P:oxidation-reduction process	0	0	2.9728	3	3	6.7894	21	24	80.3692	2
FOTG_03629	EXM32018	probable endonuclease exonuclease phosphatase family protein	F:endonuclease activity; F:exonuclease activity; P:nucleic acid phosphodiester bond hydrolysis	6	8	22.0409	6	6	11.5875	12	16	54.7663	3
FOTG_16641	EXM14982	probable isoamyl alcohol oxidase	F:oxidoreductase activity, acting on CH-OH group of donors; F:flavin adenine dinucleotide binding; P:oxidation-reduction process	7	13	33.9953	2	2	5.1911	9	14	48.3858	3
FOTG_06610	EXM27272	elongation factor 3	F:translation elongation factor activity; F:ATP binding; F:ATPase activity; C:ribosome; P:regulation of translational elongation	5	5	14.8818	10	11	19.5945	14	15	51.575	3
FOTG_06834	EXM26538	vacuolar protease a	F:aspartic-type endopeptidase activity; P:cellular response to starvation; P:lysosomal microautophagy; P:proteolysis involved in cellular protein catabolic process	5	22	55.5854	3	3	6.7894	5	6	22.9449	3
FOTG_03516	EXM31838	elongation factor 2	C:integral component of membrane; F:translation elongation factor activity; F:GTPase activity; F:GTP binding; C:ribosome; P:regulation of translational elongation	0	0	2.9728	7	7	13.1879	13	19	64.3521	2
FOTG_02422	EXM33936	atp-citrate synthase subunit 1	C:nucleus; C:cytosol; C:large ribosomal subunit; F:structural constituent of ribosome; F:lyase activity; F:transferase activity, transferring acyl groups, acyl groups converted into alkyl on transfer; F:cofactor binding; P:translation; P:ribosome biogenesis	2	2	7.733	5	10	17.9921	11	16	54.7663	3
FOTG_07981	EXM24972	protein mms22	C:nucleus; P:DNA repair; P:replication fork processing	9	17	43.5795	4	8	14.7888	3	5	19.7738	3
FOTG_06022	EXM27593	calnexin	C:integral component of endoplasmic reticulum membrane; F:calcium ion binding; F:unfolded protein binding; P:protein folding; P:ER-associated ubiquitin-dependent protein catabolic process	1	2	7.733	9	12	21.1975	9	14	48.3858	2
FOTG_03469	EXM31757	starch phosphorylase	F:glycogen phosphorylase activity; F:pyridoxal phosphate binding; P:carbohydrate metabolic process	6	7	19.6534	9	12	21.1975	10	10	35.6492	3
FOTG_14342	EXM17503	related to rf2 protein	F:chitinase activity; F:chitin binding; P:carbohydrate metabolic process; P:chitin catabolic process; P:cell wall macromolecule catabolic process	6	8	22.0409	6	6	11.5875	10	12	42.0135	3
FOTG_06291	EXM28051	hsp70-like protein	C:nucleus; C:cytoplasm; C:integral component of membrane; F:ATP binding; F:unfolded protein binding; P:protein folding; P:SRP-dependent cotranslational protein targeting to membrane, translocation	1	1	5.3524	7	8	14.7888	10	16	54.7663	2
FOTG_07447	EXM25635	pyruvate decarboxylase	F:magnesium ion binding; F:carboxy-lyase activity; F:thiamine pyrophosphate binding	0	0	2.9728	4	5	9.9876	13	18	61.1548	2
FOTG_11548	EXM20420	related to endochitinase	F:chitinase activity; F:chitin binding; P:carbohydrate metabolic process; P:chitin catabolic process; P:cell wall macromolecule catabolic process	12	16	41.1817	2	2	5.1911	5	7	26.1179	3
FOTG_14958	EXM16833	uncharacterized protein FPRN_13414	-	1	2	7.733	10	25	42.0825	4	5	19.7738	2
FOTG_10330	EXM22048	related to alpha beta fold family protein	-	6	12	31.6022	3	10	17.9921	1	5	19.7738	2
FOTG_06884	EXM26610	hypoxia up-regulated 1	C:endoplasmic reticulum lumen; F:adenyl-nucleotide exchange factor activity; F:ATP binding; F:unfolded protein binding; P:response to unfolded protein; P:posttranslational protein targeting to membrane, translocation; P:regulation of catalytic activity	1	1	5.3524	4	5	9.9876	13	15	51.575	2
FOTG_02503	EXM34062	cysteinyl-trna synthetase	C:cytoplasm; F:cysteine-tRNA ligase activity; F:ATP binding; P:cysteinyl-tRNA aminoacylation; P:cysteine metabolic process	2	5	14.8818	3	7	13.1879	5	11	38.8303	3
FOTG_06472	EXM27060	cell wall protein	-	6	6	17.267	5	20	34.0395	3	3	13.4377	3
FOTG_01127	EXM37403	Villidin	F:actin filament binding; P:actin cytoskeleton organization; P:actin filament severing	3	14	36.3897	5	8	14.7888	3	3	13.4377	3
FOTG_03869	EXM30981	related to vesicular amine transporter	C:integral component of membrane; P:transmembrane transport	4	8	22.0409	3	9	16.3902	3	7	26.1179	3
FOTG_07606	EXM25892	glyceraldehyde-3-phosphate dehydrogenase	F:glyceraldehyde-3-phosphate dehydrogenase (NAD+) (phosphorylating) activity; F:NADP binding; F:NAD binding; P:glycolytic process; P:oxidation-reduction process; P:gluconeogenesis	1	2	7.733	5	6	11.5875	10	13	45.1986	2
FOTG_02503	EXM34063	cysteinyl-trna synthetase	F:cysteine-tRNA ligase activity; F:ATP binding; P:cysteinyl-tRNA aminoacylation; P:cysteine metabolic process	4	7	19.6534	4	8	14.7888	3	8	29.293	3
FOTG_01933	EXM35500	translation elongation factor 1-alpha	F:translation elongation factor activity; F:GTPase activity; F:GTP binding; C:ribosome; P:regulation of translational elongation	1	1	5.3524	3	5	9.9876	9	14	48.3858	2
FOTG_01341	EXM34512	related to glucan -beta-glucosidase	F:glucan endo-1,3-beta-glucanase activity, C-3 substituted reducing group	5	6	17.267	4	5	9.9876	7	10	35.6492	3
FOTG_01418	EXM34666	transaldolase	C:nucleus; C:cytosol; F:sedoheptulose-7-phosphate:D-glyceraldehyde-3-phosphate glyceronetransferase activity; P:carbohydrate metabolic process; P:pentose-phosphate shunt	3	3	10.1148	7	11	19.5945	7	9	32.4701	3
FOTG_11136	EXM21025	o-methylsterigmatocystin oxidoreductase	F:monooxygenase activity; F:iron ion binding; F:oxidoreductase activity, acting on paired donors, with incorporation or reduction of molecular oxygen; F:heme binding; P:oxidation-reduction process	2	6	17.267	3	8	14.7888	1	8	29.293	2
FOTG_03385	EXM31640	fatty acid synthase subunit fungi type	C:mitochondrion; C:lipid particle; C:fatty acid synthase complex; F:[acyl-carrier-protein] S-acetyltransferase activity; F:[acyl-carrier-protein] S-malonyltransferase activity; F:enoyl-[acyl-carrier-protein] reductase (NADH) activity; F:enoyl-[acyl-carrier-protein] reductase (NADPH, B-specific) activity; F:palmitoyltransferase activity; F:3-hydroxyacyl-[acyl-carrier-protein] dehydratase activity;…	2	2	7.733	4	4	8.3883	12	13	45.1986	3
FOTG_02113	EXM33465	molecular chaperone	F:ATP binding; F:FMN binding; F:oxidoreductase activity; F:unfolded protein binding; P:protein folding; P:response to stress; P:oxidation-reduction process	0	0	2.9728	6	8	14.7888	7	12	42.0135	2
FOTG_00295	EXM35941	actin	C:cellular bud neck contractile ring; C:Swr1 complex; C:prospore membrane; C:actin filament; C:actin cortical patch; C:Ino80 complex; C:actin filament bundle; C:NuA4 histone acetyltransferase complex; C:cell tip; F:structural constituent of cytoskeleton; F:ATP binding; P:vacuole inheritance; P:actomyosin contractile ring contraction; P:chronological cell aging; P:DNA repair; P:regulation of trans…	0	0	2.9728	2	4	8.3883	7	14	48.3858	2
FOTG_02113	EXM33467	molecular chaperone	F:ATP binding; F:FMN binding; F:oxidoreductase activity; F:unfolded protein binding; P:protein folding; P:response to stress; P:oxidation-reduction process	0	0	2.9728	5	7	13.1879	7	12	42.0135	2
FOTG_06743	EXM26422	related to permeases-unknown function	C:integral component of membrane; P:transmembrane transport	3	7	19.6534	4	6	11.5875	2	7	26.1179	3
FOTG_07072	EXM26888	prostaglandin-endoperoxide synthase 1	F:peroxidase activity; F:iron ion binding; F:oxidoreductase activity, acting on paired donors, with incorporation or reduction of molecular oxygen; F:heme binding; P:response to oxidative stress; P:oxylipin biosynthetic process; P:oxidation-reduction process; P:cellular oxidant detoxification; P:obsolete peroxidase reaction	5	8	22.0409	5	8	14.7888	2	5	19.7738	3
FOTG_08732	EXM24283	adp-ribosylation factor	C:intracellular; F:GTP binding; P:small GTPase mediated signal transduction	2	2	7.733	4	9	16.3902	4	9	32.4701	3
FOTG_02101	EXM33452	probable beta (1-3) glucanosyltransferase gel3p	C:primary cell septum; C:cellular bud scar; C:mitochondrion; C:plasma membrane; C:integral component of membrane; C:ER to Golgi transport vesicle; C:anchored component of membrane; C:nuclear periphery; C:membrane raft; F:1,3-beta-glucanosyltransferase activity; P:carbohydrate metabolic process; P:chromatin silencing; P:filamentous growth; P:fungal-type cell wall organization	2	2	7.733	5	5	9.9876	7	11	38.8303	3
FOTG_06604	EXM27264	allergen asp f 4	-	2	7	19.6534	6	15	26.0094	1	2	10.2726	2
FOTG_11851	EXM20262	probable serine-type carboxypeptidase f precursor	F:serine-type carboxypeptidase activity; P:proteolysis	7	7	19.6534	8	11	19.5945	4	4	16.6047	3
FOTG_02503	EXM34064	cysteinyl-trna synthetase	F:cysteine-tRNA ligase activity; F:ATP binding; P:cysteinyl-tRNA aminoacylation; P:cysteine metabolic process	2	5	14.8818	4	8	14.7888	2	7	26.1179	3
FOTG_16226	EXM15432	Uncharacterized protein Y057_10529	-	2	5	14.8818	4	6	11.5875	4	8	29.293	3
FOTG_10535	EXM21598	acid phosphatase	F:hydrolase activity, acting on ester bonds; P:metabolic process	3	5	14.8818	4	4	8.3883	7	9	32.4701	3
FOTG_05960	EXM28865	related to cytoskeleton assembly control protein sla1	C:nucleus; C:actin cortical patch; F:cytoskeletal protein binding; F:protein binding, bridging; F:identical protein binding; F:ubiquitin binding; P:endocytosis; P:actin filament polymerization	3	10	26.8192	3	10	17.9921	1	2	10.2726	2
FOTG_00838	EXM36897	minichromosome maintenance protein 5 (cell division control protein 46)	C:nuclear chromosome, telomeric region; C:nuclear pre-replicative complex; C:cytosol; C:DNA replication preinitiation complex; C:replication fork protection complex; C:MCM complex; F:DNA helicase activity; F:chromatin binding; F:DNA replication origin binding; F:single-stranded DNA binding; F:ATP binding; P:double-strand break repair via break-induced replication; P:pre-replicative complex assemb…	2	8	22.0409	5	11	19.5945	1	3	13.4377	2
FOTG_05746	EXM28471	glucosamine-fructose-6-phosphate aminotransferase	F:glutamine-fructose-6-phosphate transaminase (isomerizing) activity; F:carbohydrate binding; F:carbohydrate derivative binding; P:carbohydrate derivative biosynthetic process; P:amino sugar metabolic process; P:carbohydrate biosynthetic process	4	4	12.4978	7	9	16.3902	6	7	26.1179	3
FOTG_02929	EXM32661	reduced viability upon starvation protein	C:chromosome, centromeric region; C:chromosome, telomeric region; C:actin cortical patch; C:mating projection tip; F:cytoskeletal protein binding; F:identical protein binding; P:chromatin silencing at telomere; P:endocytosis; P:cellular response to DNA damage stimulus; P:chromatin silencing at centromere; P:actin cortical patch localization; P:lipid tube assembly; P:establishment or maintenance o…	4	6	17.267	2	4	8.3883	4	8	29.293	3
FOTG_02714	EXM32280	translational activator gcn1	C:ribosome; F:structural constituent of ribosome; F:protein kinase regulator activity; F:protein kinase binding; F:ribosome binding; P:regulation of translation; P:cellular response to stress; P:positive regulation of kinase activity; P:regulation of protein kinase activity; P:ribosome biogenesis	5	5	14.8818	14	17	29.2199	2	2	10.2726	3
FOTG_14571	EXM17212	related to oxidoreductase	F:zinc ion binding; F:oxidoreductase activity; P:oxidation-reduction process	4	7	19.6534	4	8	14.7888	2	5	19.7738	3
FOTG_03386	EXM31641	fatty acid synthase alpha subunit	C:mitochondrion; C:fatty acid synthase complex; F:magnesium ion binding; F:3-oxoacyl-[acyl-carrier-protein] synthase activity; F:3-oxoacyl-[acyl-carrier-protein] reductase (NADPH) activity; F:holo-[acyl-carrier-protein] synthase activity; P:oxidation-reduction process; P:palmitic acid biosynthetic process; P:acyl-carrier-protein biosynthetic process; P:pantothenate biosynthetic process	1	1	5.3524	4	5	9.9876	10	11	38.8303	2
FOTG_05960	EXM28866	related to cytoskeleton assembly control protein sla1	C:nucleus; C:actin cortical patch; F:cytoskeletal protein binding; F:protein binding, bridging; F:identical protein binding; F:ubiquitin binding; P:endocytosis; P:actin filament polymerization	3	10	26.8192	2	9	16.3902	1	2	10.2726	2
FOTG_12746	EXM19290	related to oxidoreductase	F:oxidoreductase activity, acting on CH-OH group of donors; F:flavin adenine dinucleotide binding; P:oxidation-reduction process	8	10	26.8192	5	5	9.9876	3	4	16.6047	3
FOTG_00622	EXM36468	camk camkl pask protein kinase	F:protein kinase activity; F:ATP binding; P:protein phosphorylation	4	8	22.0409	3	4	8.3883	2	6	22.9449	3
FOTG_11712	EXM20345	chitinase	F:chitinase activity; F:chitin binding; P:carbohydrate metabolic process; P:chitin catabolic process; P:cell wall macromolecule catabolic process	5	8	22.0409	2	2	5.1911	6	7	26.1179	3
FOTG_01890	EXM35448	h+-transporting atpase	C:integral component of membrane; F:ATP binding; F:hydrogen-exporting ATPase activity, phosphorylative mechanism; F:metal ion binding; P:ATP biosynthetic process; P:hydrogen ion transmembrane transport; P:oxidative phosphorylation	3	9	24.4295	2	8	14.7888	1	3	13.4377	2
FOTG_02714	EXM32279	probable translation activator gcn1	C:ribosome; F:structural constituent of ribosome; F:protein kinase regulator activity; F:protein kinase binding; F:ribosome binding; P:regulation of translation; P:cellular response to stress; P:positive regulation of kinase activity; P:regulation of protein kinase activity; P:ribosome biogenesis	4	4	12.4978	14	17	29.2199	2	2	10.2726	3
FOTG_05509	EXM29368	plasma membrane atpase	C:integral component of membrane; F:ATP binding; F:hydrogen-exporting ATPase activity, phosphorylative mechanism; F:metal ion binding; P:ATP biosynthetic process; P:hydrogen ion transmembrane transport; P:oxidative phosphorylation	2	2	7.733	10	12	21.1975	6	6	22.9449	3
FOTG_05646	EXM28277	6-phosphogluconate decarboxylating 1	C:cytosol; F:phosphogluconate dehydrogenase (decarboxylating) activity; F:NADP binding; P:pentose-phosphate shunt, oxidative branch; P:oxidation-reduction process; P:D-gluconate metabolic process	0	0	2.9728	7	9	16.3902	8	9	32.4701	2
FOTG_07655	EXM25968	mannosyl-oligosaccharide glucosidase	C:endoplasmic reticulum membrane; F:mannosyl-oligosaccharide glucosidase activity; P:protein N-linked glycosylation; P:fungal-type cell wall biogenesis; P:oligosaccharide metabolic process	3	4	12.4978	2	5	9.9876	8	8	29.293	3
FOTG_02031	EXM33361	oxidoreductase	F:oxidoreductase activity; P:oxidation-reduction process	5	5	14.8818	3	7	13.1879	4	6	22.9449	3
FOTG_02424	EXM33938	atp-citrate synthase subunit 2	C:nucleus; C:cytosol; F:ATP binding; F:lyase activity; F:metal ion binding	1	1	5.3524	5	5	9.9876	8	10	35.6492	2
FOTG_09260	EXM23382	40s ribosomal protein s9	C:small ribosomal subunit; F:structural constituent of ribosome; F:rRNA binding; P:translation; P:ribosome biogenesis	3	5	14.8818	1	1	3.5932	5	9	32.4701	2
FOTG_05657	EXM28290	related to verprolin	F:methyltransferase activity; P:methylation	5	10	26.8192	3	9	16.3902	1	1	7.1096	2
FOTG_03884	EXM31011	---NA---	F:thiol-dependent ubiquitinyl hydrolase activity; P:ubiquitin-dependent protein catabolic process; P:protein deubiquitination	5	8	22.0409	5	8	14.7888	2	3	13.4377	3
FOTG_04076	EXM31334	clathrin heavy chain	C:clathrin coat of trans-Golgi network vesicle; C:clathrin coat of coated pit; C:clathrin complex; F:structural molecule activity; F:clathrin light chain binding; P:intracellular protein transport; P:endocytosis; P:clathrin coat assembly	0	0	2.9728	5	6	11.5875	9	10	35.6492	2
FOTG_02708	EXM32255	guanine nucleotide-binding protein subunit beta-like protein	C:cytosolic small ribosomal subunit; F:G-protein alpha-subunit binding; F:signal transducer activity; F:protein kinase C binding; F:GDP-dissociation inhibitor activity; F:ribosome binding; P:invasive growth in response to glucose limitation; P:G-protein coupled receptor signaling pathway; P:glucose mediated signaling pathway; P:negative regulation of translation; P:positive regulation of conjugat…	0	0	2.9728	2	2	5.1911	7	12	42.0135	2
FOTG_01127	EXM37404	Villidin	F:actin filament binding; P:actin cytoskeleton organization; P:actin filament severing	3	7	19.6534	6	9	16.3902	3	3	13.4377	3
FOTG_10175	EXM22227	60s ribosomal protein l7	C:ribosome	3	3	10.1148	5	9	16.3902	5	6	22.9449	3
FOTG_03853	EXM30951	40s ribosomal protein s3	C:cytosolic small ribosomal subunit; C:preribosome, small subunit precursor; F:RNA binding; F:structural constituent of ribosome; F:DNA-(apurinic or apyrimidinic site) lyase activity; P:ribosomal small subunit export from nucleus; P:cytoplasmic translation; P:rRNA export from nucleus; P:base-excision repair	1	1	5.3524	4	4	8.3883	5	10	35.6492	2
FOTG_00597	EXM36433	related to component of non-clathrin vesicle coat	F:ARF guanyl-nucleotide exchange factor activity; P:regulation of ARF protein signal transduction; P:positive regulation of GTPase activity	3	9	24.4295	5	9	16.3902	1	1	7.1096	2
FOTG_07603	EXM25888	-like helicase 2	C:Swr1 complex; C:cytosol; C:Ino80 complex; C:ASTRA complex; C:R2TP complex; F:ATP binding; F:ATP-dependent 3'-5' DNA helicase activity; F:ATP-dependent 5'-3' DNA helicase activity; P:box C/D snoRNP assembly; P:DNA repair; P:regulation of transcription from RNA polymerase II promoter; P:rRNA processing; P:DNA duplex unwinding; P:histone exchange; C:replication fork	3	5	14.8818	3	11	19.5945	1	3	13.4377	2
FOTG_03566	EXM31908	beta-tubulin	C:cytoplasm; C:microtubule; F:GTPase activity; F:structural constituent of cytoskeleton; F:GTP binding; P:microtubule-based process; P:response to antibiotic	1	1	5.3524	3	3	6.7894	6	10	35.6492	2
FOTG_14032	EXM17782	related to non-ribosomal peptide synthetase	C:integral component of membrane	2	6	17.267	4	11	19.5945	1	2	10.2726	2
FOTG_09083	EXM23642	related to ribosomal rna processing protein rrp5	F:nucleic acid binding; F:protein binding; P:RNA processing	2	2	7.733	8	9	16.3902	3	6	22.9449	3
FOTG_03968	EXM31151	cell division control protein 48	C:nuclear chromatin; C:Doa10p ubiquitin ligase complex; C:Hrd1p ubiquitin ligase ERAD-L complex; C:cytosol; C:VCP-NPL4-UFD1 AAA ATPase complex; C:Cdc48p-Npl4p-Vms1p AAA ATPase complex; C:mating projection tip; C:mitotic spindle midzone; C:RQC complex; F:ATP binding; F:ATPase activity; F:ubiquitin binding; P:vesicle fusion; P:endoplasmic reticulum membrane fusion; P:protein processing; P:retrograd…	0	0	2.9728	4	4	8.3883	6	10	35.6492	2
FOTG_13560	EXM18286	glucoamylase	F:glucan 1,4-alpha-glucosidase activity; F:starch binding; P:polysaccharide catabolic process; P:starch metabolic process; P:sucrose metabolic process; C:glucosidase II complex	3	4	12.4978	0	0	1.9959	7	9	32.4701	2
FOTG_18263	EXM13283	---NA---	-	1	1	5.3524	10	18	30.8259	2	2	10.2726	2
FOTG_02440	EXM33965	carrier protein	C:mitochondrial inner membrane; C:integral component of membrane; F:transporter activity; P:transmembrane transport	2	3	10.1148	6	11	19.5945	4	4	16.6047	3
FOTG_06151	EXM27824	uncharacterized protein LW93_2348	-	1	2	7.733	5	12	21.1975	2	4	16.6047	2
FOTG_16567	EXM15054	short-chain dehydrogenase	F:oxidoreductase activity	1	4	12.4978	2	11	19.5945	2	3	13.4377	2
FOTG_13226	EXM18697	acetoacetate- ligase	F:acetoacetate-CoA ligase activity; P:lipid metabolic process	4	6	17.267	4	4	8.3883	3	5	19.7738	3
FOTG_09338	EXM23497	related to coatomer gamma-2 subunit	C:Golgi membrane; C:cytosol; C:COPI vesicle coat; F:structural molecule activity; F:binding; P:intracellular protein transport; P:ER to Golgi vesicle-mediated transport; P:retrograde vesicle-mediated transport, Golgi to ER	2	2	7.733	3	4	8.3883	4	8	29.293	3
FOTG_01390	EXM34601	polyketide synthase	F:oxidoreductase activity; F:transferase activity; F:phosphopantetheine binding; P:oxidation-reduction process	6	7	19.6534	7	12	21.1975	0	0	3.9485	2
FOTG_15568	EXM16095	magnesium-translocating p-type atpase	C:integral component of membrane; F:ATP binding; F:magnesium-importing ATPase activity; F:metal ion binding; P:magnesium ion transmembrane transport	6	7	19.6534	3	6	11.5875	3	3	13.4377	3
FOTG_02249	EXM33658	dynactin 1	C:astral microtubule; C:spindle pole body; C:dynactin complex; C:cell cortex; F:dynein complex binding; P:establishment of mitotic spindle orientation; P:transport along microtubule	5	5	14.8818	4	7	13.1879	3	4	16.6047	3
FOTG_08732	EXM24285	adp-ribosylation factor	C:intracellular; F:GTP binding; P:small GTPase mediated signal transduction	1	1	5.3524	3	5	9.9876	3	8	29.293	2
FOTG_07192	EXM26173	30s ribosomal protein s17p-like protein	F:protein binding	5	8	22.0409	6	10	17.9921	0	0	3.9485	2
FOTG_13436	EXM18509	peroxisomal -2-hydroxy-acid oxidase glo4	F:FMN binding; F:oxidoreductase activity; P:oxidation-reduction process	0	0	2.9728	8	8	14.7888	5	7	26.1179	2
FOTG_14260	EXM17569	catalase-peroxidase	F:catalase activity; F:heme binding; F:metal ion binding; P:response to oxidative stress; P:hydrogen peroxide catabolic process; P:oxidation-reduction process; P:cellular oxidant detoxification; P:tryptophan metabolic process; P:obsolete peroxidase reaction; P:methane metabolic process	2	2	7.733	7	7	13.1879	4	6	22.9449	3
FOTG_07655	EXM25969	mannosyl-oligosaccharide glucosidase	C:endoplasmic reticulum membrane; F:mannosyl-oligosaccharide glucosidase activity; P:protein N-linked glycosylation; P:fungal-type cell wall biogenesis; P:oligosaccharide metabolic process	1	2	7.733	2	5	9.9876	7	7	26.1179	2
FOTG_17895	EXM13657	phosphoglycerate kinase	C:mitochondrion; F:phosphoglycerate kinase activity; F:ATP binding; P:gluconeogenesis; P:glycolytic process; P:carbon utilization	0	0	2.9728	4	4	8.3883	7	9	32.4701	2
FOTG_06560	EXM27202	40s ribosomal protein s16	C:ribosome; F:structural constituent of ribosome; P:translation; P:ribosome biogenesis	0	0	2.9728	3	4	8.3883	3	9	32.4701	2
FOTG_05432	EXM29255	40s ribosomal protein s2	C:cytosolic small ribosomal subunit; C:small-subunit processome; F:structural constituent of ribosome; F:small ribosomal subunit rRNA binding; P:rRNA export from nucleus; P:positive regulation of translational fidelity	2	4	12.4978	3	4	8.3883	5	6	22.9449	3
FOTG_07606	EXM25894	glyceraldehyde 3-phosphate dehydrogenase	F:glyceraldehyde-3-phosphate dehydrogenase (NAD+) (phosphorylating) activity; F:NADP binding; F:NAD binding; P:glycolytic process; P:oxidation-reduction process; P:gluconeogenesis	0	0	2.9728	2	2	5.1911	8	10	35.6492	2
FOTG_03968	EXM31152	cell division control protein 48	C:nuclear chromatin; C:Doa10p ubiquitin ligase complex; C:Hrd1p ubiquitin ligase ERAD-L complex; C:cytosol; C:VCP-NPL4-UFD1 AAA ATPase complex; C:Cdc48p-Npl4p-Vms1p AAA ATPase complex; C:mating projection tip; C:mitotic spindle midzone; C:RQC complex; F:ATP binding; F:ATPase activity; F:ubiquitin binding; P:vesicle fusion; P:endoplasmic reticulum membrane fusion; P:protein processing; P:retrograd…	0	0	2.9728	2	2	5.1911	6	10	35.6492	2
FOTG_03175	EXM33069	related to rasp f 7 allergen	-	1	1	5.3524	6	16	27.6144	2	2	10.2726	2
FOTG_14636	EXM17151	related to negative-acting regulatory protein	F:3-dehydroquinate dehydratase activity; F:shikimate 3-dehydrogenase (NADP+) activity; P:oxidation-reduction process; P:tryptophan biosynthetic process; P:tyrosine biosynthetic process; P:L-phenylalanine biosynthetic process	2	5	14.8818	6	10	17.9921	1	2	10.2726	2
FOTG_05551	EXM29429	elongation factor mitochondrial	C:mitochondrion; F:translation elongation factor activity; F:GTPase activity; F:GTP binding; P:mitochondrial translational elongation; C:ribosome; P:regulation of translational elongation	2	3	10.1148	3	9	16.3902	4	4	16.6047	3
FOTG_07864	EXM25447	related to tubulin-folding cofactor d	C:astral microtubule; C:nucleus; C:cytosol; C:cell division site; C:mitotic spindle; F:catalytic activity; F:GTPase activator activity; F:beta-tubulin binding; P:tubulin complex assembly; P:post-chaperonin tubulin folding pathway; P:cytoplasmic microtubule organization; P:positive regulation of GTPase activity; P:establishment or maintenance of cell polarity regulating cell shape; C:tubulin compl…	3	5	14.8818	4	8	14.7888	3	3	13.4377	3
FOTG_07844	EXM25403	cohesin loading factor subunit scc2	C:nuclear chromatin; C:2-micrometer circle DNA; C:cytosol; C:SMC loading complex; F:chromatin binding; P:transcription-dependent tethering of RNA polymerase II gene DNA at nuclear periphery; P:mitotic chromosome condensation; P:regulation of gene expression; P:establishment of mitotic sister chromatid cohesion; P:tRNA gene clustering; P:rDNA condensation; P:establishment of protein localization t…	7	10	26.8192	6	6	11.5875	0	0	3.9485	2
FOTG_13436	EXM18508	probable l-lactate dehydrogenase	F:FMN binding; F:oxidoreductase activity; P:oxidation-reduction process	0	0	2.9728	7	7	13.1879	5	7	26.1179	2
FOTG_09083	EXM23643	ribosomal rna processing protein rrp5	F:nucleic acid binding; F:protein binding	2	2	7.733	5	6	11.5875	3	6	22.9449	3
FOTG_07078	EXM26897	related to capsular associated protein	F:transferase activity	3	5	14.8818	4	11	19.5945	1	1	7.1096	2
FOTG_04030	EXM31262	dephospho- kinase	C:nuclear envelope; C:mitochondrion; C:endoplasmic reticulum; F:dephospho-CoA kinase activity; F:ATP binding; P:coenzyme A biosynthetic process; P:phosphorylation; P:pantothenate biosynthetic process	2	5	14.8818	2	7	13.1879	3	3	13.4377	3
FOTG_07072	EXM26889	prostaglandin-endoperoxide synthase 1	F:peroxidase activity; F:iron ion binding; F:oxidoreductase activity, acting on paired donors, with incorporation or reduction of molecular oxygen; F:heme binding; P:response to oxidative stress; P:oxylipin biosynthetic process; P:oxidation-reduction process; P:cellular oxidant detoxification; P:obsolete peroxidase reaction	4	7	19.6534	2	4	8.3883	1	3	13.4377	2
FOTG_03380	EXM31630	nit-4 pathway-specific regulatory protein nit-4	C:nucleus; F:RNA polymerase II transcription factor activity, sequence-specific DNA binding; F:DNA binding; F:zinc ion binding; P:regulation of transcription from RNA polymerase II promoter	3	7	19.6534	1	4	8.3883	2	3	13.4377	2
FOTG_05692	EXM28348	60s ribosomal protein l9-b	C:ribosome; F:structural constituent of ribosome; F:rRNA binding; P:translation; P:ribosome biogenesis	1	1	5.3524	3	5	9.9876	4	7	26.1179	2
FOTG_08674	EXM24200	related to carboxypeptidase y-sorting protein pep1 precursor	C:Golgi apparatus; C:integral component of membrane; F:carboxypeptidase activity; F:protein binding; P:proteolysis; P:transport	1	1	5.3524	3	5	9.9876	6	7	26.1179	2
FOTG_12067	EXM20041	endopolygalacturonase	C:extracellular region; F:polygalacturonase activity; P:cell wall organization; P:starch metabolic process; P:sucrose metabolic process	1	1	5.3524	2	3	6.7894	3	8	29.293	2
FOTG_10616	EXM21688	catalase-peroxidase 2	F:catalase activity; F:heme binding; F:metal ion binding; P:response to oxidative stress; P:hydrogen peroxide catabolic process; P:oxidation-reduction process; P:cellular oxidant detoxification; P:tryptophan metabolic process; P:obsolete peroxidase reaction; P:methane metabolic process	3	3	10.1148	2	2	5.1911	5	7	26.1179	3
FOTG_03707	EXM32114	---NA---	-	4	4	12.4978	6	12	21.1975	1	1	7.1096	2
FOTG_09947	EXM22292	probable fun12-general translation factor eif2 homolog	F:protein binding	3	8	22.0409	3	8	14.7888	0	0	3.9485	2
FOTG_01465	EXM34745	probable uvsb pi-3 kinase	F:DNA binding; F:protein serine/threonine kinase activity; F:protein binding; F:ATP binding; F:zinc ion binding; P:protein phosphorylation; P:serine family amino acid metabolic process	7	8	22.0409	4	4	8.3883	2	2	10.2726	3
FOTG_10472	EXM21882	uncharacterized protein Y057_12864	-	2	2	7.733	5	5	9.9876	4	6	22.9449	3
FOTG_06015	EXM27574	oligosaccharyl transferase complex subunit ost4	C:integral component of membrane; F:dolichyl-diphosphooligosaccharide-protein glycotransferase activity; C:oligosaccharyltransferase complex; P:protein N-linked glycosylation via asparagine	5	6	17.267	1	1	3.5932	4	5	19.7738	2
FOTG_06954	EXM26715	gtp-binding protein ypt1	C:Golgi membrane; C:pre-autophagosomal structure; C:nucleus; C:mitochondrion; C:endoplasmic reticulum membrane; C:Golgi stack; C:trans-Golgi network; C:cytosol; C:cytoplasmic vesicle; F:SNARE binding; F:GTPase activity; F:GTP binding; P:protein complex assembly; P:retrograde vesicle-mediated transport, Golgi to ER; P:small GTPase mediated signal transduction; P:macroautophagy; P:CVT pathway; P:en…	1	1	5.3524	5	12	21.1975	3	3	13.4377	2
FOTG_11003	EXM21168	glycosyl family partial	C:alpha,alpha-trehalose-phosphate synthase complex (UDP-forming); F:trehalose-phosphatase activity; F:transferase activity; P:trehalose biosynthetic process; P:dephosphorylation; P:cellular response to heat; P:starch metabolic process; P:sucrose metabolic process	3	3	10.1148	5	9	16.3902	3	3	13.4377	3
FOTG_12974	EXM18988	oligosaccharyl transferase complex subunit ost4	C:nuclear envelope; C:oligosaccharyltransferase complex; C:integral component of membrane; F:transferase activity, transferring glycosyl groups; P:mitotic cell cycle; P:protein N-linked glycosylation via asparagine	3	3	10.1148	4	5	9.9876	4	5	19.7738	3
FOTG_08046	EXM25074	trna -lysidine synthase	C:cytoplasm; F:ATP binding; F:ligase activity, forming carbon-nitrogen bonds; P:tRNA processing	1	1	5.3524	3	4	8.3883	2	7	26.1179	2
FOTG_11025	EXM21197	coatomer protein subunit alpha	C:Golgi membrane; C:COPI vesicle coat; F:structural molecule activity; F:ubiquitin binding; P:intracellular protein transport; P:ER to Golgi vesicle-mediated transport; P:retrograde vesicle-mediated transport, Golgi to ER	1	1	5.3524	2	2	5.1911	7	8	29.293	2
FOTG_12688	EXM19230	atrophin-1 interacting protein 2 (ww domain containing e3 ubiquitin protein ligase 2)	F:chitin synthase activity; F:protein binding; F:ligase activity; P:chitin biosynthetic process	2	6	17.267	4	6	11.5875	2	2	10.2726	3
FOTG_06255	EXM28002	uncharacterized protein LW94_1763	F:DNA binding	4	6	17.267	4	4	8.3883	2	3	13.4377	3
FOTG_15263	EXM16460	---NA---	-	3	8	22.0409	1	1	3.5932	3	3	13.4377	2
FOTG_03774	EXM32216	related to glucan -beta-glucosidase	F:hydrolase activity, hydrolyzing O-glycosyl compounds; P:carbohydrate metabolic process	0	0	2.9728	2	3	6.7894	8	8	29.293	2
FOTG_18946	EXM12556	probable acetylxylan esterase	C:extracellular region; F:hydrolase activity, hydrolyzing O-glycosyl compounds; F:cellulose binding; P:carbohydrate metabolic process	2	5	14.8818	3	9	16.3902	1	1	7.1096	2
FOTG_07864	EXM25448	---NA---	F:binding	3	5	14.8818	3	7	13.1879	2	2	10.2726	3
FOTG_11216	EXM20835	uncharacterized protein LW93_4198	-	2	5	14.8818	4	7	13.1879	1	2	10.2726	2
FOTG_15595	EXM16065	related to calcium-independent phospholipase a2	-	4	7	19.6534	3	4	8.3883	2	2	10.2726	3
FOTG_16976	EXM14649	related to calcium-independent phospholipase a2	P:lipid metabolic process	4	7	19.6534	3	4	8.3883	2	2	10.2726	3
FOTG_01465	EXM34746	probable uvsb pi-3 kinase	F:DNA binding; F:protein serine/threonine kinase activity; F:protein binding; F:ATP binding; F:zinc ion binding; P:protein phosphorylation; P:serine family amino acid metabolic process	6	7	19.6534	4	4	8.3883	2	2	10.2726	3
FOTG_02029	EXM33358	extracellular membrane cfem domain-containing protein	-	3	5	14.8818	2	5	9.9876	3	3	13.4377	3
FOTG_07930	EXM25549	probable 4-alpha-glucanotransferase amylo- -glucosidase (glycogen-debranching enzyme)	C:cytoplasm; F:4-alpha-glucanotransferase activity; F:amylo-alpha-1,6-glucosidase activity; P:glycogen biosynthetic process; P:glycogen catabolic process; P:starch metabolic process; P:sucrose metabolic process	2	3	10.1148	4	6	11.5875	4	4	16.6047	3
FOTG_04708	EXM29498	probable mannosyltransferase involved in n-linked and o-linked glycosylation	F:mannosyltransferase activity; P:protein glycosylation; P:mannosylation; C:alpha-1,6-mannosyltransferase complex	3	3	10.1148	4	6	11.5875	3	4	16.6047	3
FOTG_08888	EXM23936	uncharacterized protein FPRO_03681	-	4	7	19.6534	2	2	5.1911	2	3	13.4377	3
FOTG_06890	EXM26616	5-methyltetrahydropteroyltriglutamate-homocysteine methyltransferase	C:nucleus; C:cytosol; F:5-methyltetrahydropteroyltriglutamate-homocysteine S-methyltransferase activity; F:zinc ion binding; P:L-methionine biosynthetic process from homoserine via O-acetyl-L-homoserine and cystathionine; P:methylation; P:adenine biosynthetic process	3	3	10.1148	4	4	8.3883	4	5	19.7738	3
FOTG_05746	EXM28472	glucosamine-fructose-6-phosphate aminotransferase	F:glutamine-fructose-6-phosphate transaminase (isomerizing) activity; F:carbohydrate binding; F:carbohydrate derivative binding; P:carbohydrate derivative biosynthetic process; P:amino sugar metabolic process; P:carbohydrate biosynthetic process	3	3	10.1148	4	4	8.3883	4	5	19.7738	3
FOTG_11956	EXM20146	protein disulfide-isomerase	C:fungal-type vacuole; F:protein disulfide isomerase activity; F:protein disulfide oxidoreductase activity; F:protein-disulfide reductase (glutathione) activity; P:protein folding; P:cell redox homeostasis; P:oxidation-reduction process; P:obsolete electron transport; P:glutathione metabolic process	2	3	10.1148	4	4	8.3883	5	5	19.7738	3
FOTG_10171	EXM22222	tryptophanyl-trna synthetase	C:mitochondrion; F:tryptophan-tRNA ligase activity; F:ATP binding; P:mitochondrial tryptophanyl-tRNA aminoacylation; P:tryptophan metabolic process	2	3	10.1148	1	4	8.3883	3	5	19.7738	2
FOTG_10182	EXM22236	pre-mrna-splicing factor spp42	C:spliceosomal complex; C:U5 snRNP; C:U4/U6 x U5 tri-snRNP complex; F:protein binding; F:U6 snRNA binding; F:U1 snRNA binding; F:U2 snRNA binding; F:U5 snRNA binding; F:pre-mRNA intronic binding; P:spliceosomal tri-snRNP complex assembly; P:generation of catalytic spliceosome for second transesterification step; P:mRNA 3'-splice site recognition	2	2	7.733	10	13	22.8009	1	1	7.1096	2
FOTG_03391	EXM31647	atp-dependent dna helicase ii subunit 1	C:nuclear chromosome, telomeric region; C:Ku70:Ku80 complex; F:RNA polymerase II transcription factor activity, sequence-specific DNA binding; F:damaged DNA binding; F:ATP-dependent DNA helicase activity; F:zinc ion binding; F:telomeric DNA binding; P:telomere maintenance; P:double-strand break repair via nonhomologous end joining; P:regulation of transcription from RNA polymerase II promoter; P:…	7	8	22.0409	4	4	8.3883	1	1	7.1096	2
FOTG_05923	EXM28802	enolase	C:phosphopyruvate hydratase complex; F:magnesium ion binding; F:phosphopyruvate hydratase activity; P:glycolytic process; P:tryptophan biosynthetic process; P:gluconeogenesis; P:tyrosine biosynthetic process; P:L-phenylalanine biosynthetic process	0	0	2.9728	6	6	11.5875	5	6	22.9449	2
FOTG_13436	EXM18510	probable l-lactate dehydrogenase	F:FMN binding; F:oxidoreductase activity; P:oxidation-reduction process	0	0	2.9728	6	6	11.5875	4	6	22.9449	2
FOTG_04435	EXM30469	dna repair protein rad50	C:integral component of membrane; C:Mre11 complex; F:double-stranded telomeric DNA binding; F:adenylate kinase activity; F:ATPase activity; F:single-stranded telomeric DNA binding; F:G-quadruplex DNA binding; P:telomere maintenance via recombination; P:double-strand break repair via homologous recombination; P:gene conversion at mating-type locus, DNA repair synthesis; P:base-excision repair; P:d…	0	0	2.9728	3	4	8.3883	3	7	26.1179	2
FOTG_13015	EXM19039	related to small s protein	-	2	4	12.4978	0	0	1.9959	3	6	22.9449	2
FOTG_04317	EXM30280	aldehyde dehydrogenase	C:nucleus; C:Golgi apparatus; C:cytosol; F:retinal dehydrogenase activity; F:formyltetrahydrofolate dehydrogenase activity; F:aldehyde dehydrogenase (NADP+) activity; F:4-trimethylammoniobutyraldehyde dehydrogenase activity; P:oxidation-reduction process; P:retinol metabolic process; P:lysine catabolic process	4	5	14.8818	5	10	17.9921	0	0	3.9485	2
FOTG_05740	EXM28463	related to nuclear localization protein npl6	C:RSC complex; F:DNA-dependent ATPase activity; P:nucleosome disassembly; P:transcription elongation from RNA polymerase II promoter; P:protein import into nucleus; P:cellular response to DNA damage stimulus; P:ATP-dependent chromatin remodeling	3	5	14.8818	4	8	14.7888	1	1	7.1096	2
FOTG_17233	EXM14360	ankyrin repeat- partial	C:membrane; F:protein binding; F:metal ion transmembrane transporter activity; P:metal ion transport; P:transmembrane transport	3	5	14.8818	3	4	8.3883	1	3	13.4377	2
FOTG_15090	EXM16660	lysophospholipase	F:lysophospholipase activity; P:phospholipid catabolic process	2	3	10.1148	1	5	9.9876	3	4	16.6047	2
FOTG_04722	EXM29517	related to beta-nap protein	C:nucleus; C:cytosol; C:AP-3 adaptor complex; F:binding; F:protein transporter activity; P:protein targeting to vacuole; P:Golgi to vacuole transport	1	1	5.3524	4	4	8.3883	4	6	22.9449	2
FOTG_01341	EXM34513	related to glucan -beta-glucosidase	F:glucan endo-1,3-beta-glucanase activity, C-3 substituted reducing group	4	5	14.8818	2	2	5.1911	4	4	16.6047	3
FOTG_07351	EXM26349	protein transport protein sec61 alpha subunit	C:endoplasmic reticulum; C:Golgi apparatus; C:integral component of membrane; P:protein transport	0	0	2.9728	4	11	19.5945	3	3	13.4377	2
FOTG_06596	EXM27254	related to component of non-clathrin vesicle coat	F:ARF guanyl-nucleotide exchange factor activity; F:binding; P:regulation of ARF protein signal transduction; P:positive regulation of GTPase activity	4	4	12.4978	5	7	13.1879	2	2	10.2726	3
FOTG_18201	EXM13343	ankyrin repeat-containing protein	F:catalytic activity; F:protein binding; P:nucleoside metabolic process	4	8	22.0409	2	3	6.7894	1	1	7.1096	2
FOTG_07930	EXM25548	probable 4-alpha-glucanotransferase amylo- -glucosidase (glycogen-debranching enzyme)	C:cytoplasm; F:4-alpha-glucanotransferase activity; F:amylo-alpha-1,6-glucosidase activity; P:glycogen biosynthetic process; P:glycogen catabolic process; P:starch metabolic process; P:sucrose metabolic process	1	2	7.733	4	6	11.5875	4	4	16.6047	2
FOTG_05296	EXM29061	glutamyl aminopeptidase	F:aminopeptidase activity; F:metallopeptidase activity; F:zinc ion binding; P:proteolysis	2	2	7.733	6	6	11.5875	4	4	16.6047	3
FOTG_04615	EXM30729	er membrane protein complex subunit	C:ER membrane protein complex	0	0	2.9728	4	5	9.9876	6	6	22.9449	2
FOTG_03074	EXM32904	---NA---	F:ATP binding	4	6	17.267	1	2	5.1911	3	3	13.4377	2
FOTG_07620	EXM25910	uncharacterized protein FPRO_06183	-	1	2	7.733	3	4	8.3883	4	5	19.7738	2
FOTG_12535	EXM19486	choline dehydrogenase	F:oxidoreductase activity, acting on CH-OH group of donors; F:flavin adenine dinucleotide binding; P:oxidation-reduction process	0	0	2.9728	2	3	6.7894	5	7	26.1179	2
FOTG_05527	EXM29397	related to capsular associated protein	C:integral component of membrane	2	3	10.1148	5	8	14.7888	2	2	10.2726	3
FOTG_03211	EXM33118	related to tol protein	-	3	3	10.1148	2	6	11.5875	1	3	13.4377	2
FOTG_07087	EXM26908	uncharacterized protein FPRO_11216	-	3	7	19.6534	2	2	5.1911	2	2	10.2726	3
FOTG_09713	EXM22970	related to triacylglycerol lipase ii precursor	-	3	5	14.8818	3	3	6.7894	3	3	13.4377	3
FOTG_01799	EXM35309	related to oxysterol-binding protein	F:protein binding	4	5	14.8818	3	3	6.7894	3	3	13.4377	3
FOTG_04070	EXM31328	adenosylhomocysteinase	F:adenosylhomocysteinase activity; F:NAD binding; P:triglyceride metabolic process; P:phosphatidylcholine biosynthetic process; P:one-carbon metabolic process; P:S-adenosylhomocysteine catabolic process; P:methionine metabolic process	2	3	10.1148	4	4	8.3883	4	4	16.6047	3
FOTG_00117	EXM35683	wings apart	-	2	3	10.1148	3	4	8.3883	1	4	16.6047	2
FOTG_05841	EXM28629	glucose-6-phosphate 1-dehydrogenase	C:cytoplasm; F:glucose-6-phosphate dehydrogenase activity; F:NADP binding; P:glucose metabolic process; P:NADPH regeneration; P:pentose-phosphate shunt, oxidative branch; P:response to hydrogen peroxide; P:glutathione metabolic process	1	1	5.3524	2	3	6.7894	6	6	22.9449	2
FOTG_12660	EXM19411	uncharacterized protein FMAN_14914	C:integral component of membrane; F:transferase activity, transferring glycosyl groups	1	3	10.1148	2	2	5.1911	5	5	19.7738	2
FOTG_07975	EXM24962	atp synthase subunit mitochondrial	C:mitochondrial proton-transporting ATP synthase, catalytic core; F:ATP binding; F:ADP binding; F:proton-transporting ATP synthase activity, rotational mechanism; F:proton-transporting ATPase activity, rotational mechanism; P:ATP hydrolysis coupled proton transport; P:mitochondrial ATP synthesis coupled proton transport; P:oxidative phosphorylation	0	0	2.9728	9	12	21.1975	2	2	10.2726	2
FOTG_07351	EXM26350	protein transporter sec61 subunit alpha	C:endoplasmic reticulum; C:Golgi apparatus; C:integral component of membrane; P:protein transport	0	0	2.9728	3	10	17.9921	3	3	13.4377	2
FOTG_07844	EXM25405	cohesin loading factor subunit scc2	F:chromatin binding; P:mitotic sister chromatid cohesion; P:regulation of gene expression; C:chromatin	5	8	22.0409	4	4	8.3883	0	0	3.9485	2
FOTG_11003	EXM21169	trehalose 6-phosphate synthase	C:alpha,alpha-trehalose-phosphate synthase complex (UDP-forming); F:trehalose-phosphatase activity; F:transferase activity; P:trehalose biosynthetic process; P:dephosphorylation; P:cellular response to heat; P:starch metabolic process; P:sucrose metabolic process	2	2	7.733	4	7	13.1879	3	3	13.4377	3
FOTG_11003	EXM21170	trehalose 6-phosphate synthase	C:alpha,alpha-trehalose-phosphate synthase complex (UDP-forming); F:trehalose-phosphatase activity; F:transferase activity; P:trehalose biosynthetic process; P:dephosphorylation; P:cellular response to heat; P:starch metabolic process; P:sucrose metabolic process	2	2	7.733	3	7	13.1879	3	3	13.4377	3
FOTG_07044	EXM26856	ubiquitin-40s ribosomal protein s27a	C:cytosolic small ribosomal subunit; F:structural constituent of ribosome; F:protein binding; F:protein tag; P:ribosomal small subunit assembly; P:maturation of SSU-rRNA from tricistronic rRNA transcript (SSU-rRNA, LSU-rRNA,5S); P:cytoplasmic translation	1	2	7.733	3	5	9.9876	4	4	16.6047	2
FOTG_01354	EXM34538	ubiquitin c	C:cytoplasm; F:protein binding; F:zinc ion binding	1	2	7.733	3	5	9.9876	4	4	16.6047	2
FOTG_15377	EXM16276	probable isoamyl alcohol oxidase	F:oxidoreductase activity, acting on CH-OH group of donors; F:flavin adenine dinucleotide binding; P:oxidation-reduction process	4	6	17.267	1	1	3.5932	3	3	13.4377	2
FOTG_16162	EXM15489	fusarubin cluster-esterase	-	3	4	12.4978	2	2	5.1911	3	4	16.6047	3
FOTG_02938	EXM32678	transketolase	C:nucleus; C:cytosol; F:transketolase activity; F:metal ion binding; P:pentose-phosphate shunt; P:carbon utilization	0	0	2.9728	2	2	5.1911	6	7	26.1179	2
FOTG_10616	EXM21689	catalase-peroxidase 2	F:catalase activity; F:heme binding; F:metal ion binding; P:response to oxidative stress; P:hydrogen peroxide catabolic process; P:oxidation-reduction process; P:cellular oxidant detoxification; P:tryptophan metabolic process; P:obsolete peroxidase reaction; P:methane metabolic process	2	2	7.733	1	1	3.5932	4	6	22.9449	2
FOTG_08792	EXM23827	tpr domain-containing protein	C:cellular_component; F:molecular_function; P:biological_process	3	7	19.6534	3	5	9.9876	0	0	3.9485	2
FOTG_05949	EXM28845	related to voltage gated ca2+ channel	C:voltage-gated calcium channel complex; F:voltage-gated calcium channel activity; F:calcium ion binding; P:regulation of ion transmembrane transport; P:calcium ion transmembrane transport	1	1	5.3524	6	8	14.7888	3	3	13.4377	2
FOTG_10297	EXM22013	cyclopropane-fatty-acyl-phospholipid synthase	C:integral component of membrane; F:methyltransferase activity; P:lipid biosynthetic process; P:methylation	3	5	14.8818	4	6	11.5875	1	1	7.1096	2
FOTG_00670	EXM36570	protein smg7	F:protein binding	1	1	5.3524	3	6	11.5875	2	4	16.6047	2
FOTG_05296	EXM29060	glutamyl aminopeptidase	F:aminopeptidase activity; F:metallopeptidase activity; F:zinc ion binding; P:proteolysis	3	3	10.1148	5	5	9.9876	3	3	13.4377	3
FOTG_06587	EXM27241	related to fre1-ferric (and cupric) reductase	C:integral component of membrane	1	3	10.1148	3	3	6.7894	2	4	16.6047	2
FOTG_07454	EXM25645	probable copii coated vesicle component sec24	C:cytosol; C:COPII vesicle coat; C:endoplasmic reticulum exit site; F:zinc ion binding; P:intracellular protein transport; P:ER to Golgi vesicle-mediated transport	2	4	12.4978	2	9	16.3902	0	0	3.9485	2
FOTG_13520	EXM18422	filamentous hemagglutinin adhesin	-	2	2	7.733	4	6	11.5875	1	3	13.4377	2
FOTG_16794	EXM14830	related to dienelactone hydrolase family protein	F:hydrolase activity	2	4	12.4978	4	5	9.9876	1	2	10.2726	2
FOTG_07413	EXM26415	lrr and pyd domains-containing protein 3	F:binding	3	4	12.4978	4	5	9.9876	2	2	10.2726	3
FOTG_06602	EXM27261	uncharacterized protein FMAN_12639	-	2	4	12.4978	3	5	9.9876	1	2	10.2726	2
FOTG_18392	EXM13148	---NA---	C:nucleus; F:RNA polymerase II transcription factor activity, sequence-specific DNA binding; F:DNA binding; F:zinc ion binding; P:regulation of transcription, DNA-templated	3	4	12.4978	4	5	9.9876	1	2	10.2726	2
FOTG_10345	EXM21723	related to microbial serine proteinase	F:serine-type endopeptidase activity; F:protein binding; P:proteolysis	0	0	2.9728	4	5	9.9876	2	5	19.7738	2
FOTG_11311	EXM20663	beta-lactamase-like protein 2	-	2	2	7.733	4	4	8.3883	1	4	16.6047	2
FOTG_01642	EXM35068	related to ccc2-p-type atpase involved in export of cu++ from the cytosol into secret	C:integral component of membrane; F:nucleotide binding; F:cation-transporting ATPase activity; F:metal ion binding; P:metal ion transport; P:cation transmembrane transport	2	4	12.4978	2	3	6.7894	2	3	13.4377	3
FOTG_01799	EXM35308	related to oxysterol-binding protein	F:protein binding	3	4	12.4978	3	3	6.7894	3	3	13.4377	3
FOTG_08374	EXM24356	d-lactate dehydrogenase	C:integral component of membrane; F:oxidoreductase activity, acting on CH-OH group of donors; F:flavin adenine dinucleotide binding; P:oxidation-reduction process	3	4	12.4978	3	3	6.7894	3	3	13.4377	3
FOTG_05841	EXM28628	glucose-6-phosphate 1-dehydrogenase	C:cytoplasm; F:glucose-6-phosphate dehydrogenase activity; F:NADP binding; P:glucose metabolic process; P:NADPH regeneration; P:pentose-phosphate shunt, oxidative branch; P:response to hydrogen peroxide; P:glutathione metabolic process	0	0	2.9728	2	3	6.7894	6	6	22.9449	2
FOTG_06092	EXM27736	oligosaccharyl transferase stt3 subunit	C:oligosaccharyltransferase complex; C:integral component of membrane; F:dolichyl-diphosphooligosaccharide-protein glycotransferase activity; P:protein N-linked glycosylation via asparagine	0	0	2.9728	3	3	6.7894	4	6	22.9449	2
FOTG_10174	EXM22225	eukaryotic translation initiation factor 3 subunit c	C:cytosol; C:cytoplasmic stress granule; C:eukaryotic 43S preinitiation complex; C:eukaryotic 48S preinitiation complex; C:multi-eIF complex; C:eukaryotic translation initiation factor 3 complex, eIF3e; C:eukaryotic translation initiation factor 3 complex, eIF3m; F:translation initiation factor activity; F:translation initiation factor binding; P:formation of translation preinitiation complex; P:…	6	6	17.267	0	0	1.9959	2	3	13.4377	2
FOTG_12204	EXM19758	related to pmu1-high copy suppressor of ts tps2 mutant phenotype	-	5	6	17.267	0	0	1.9959	2	3	13.4377	2
FOTG_02407	EXM33911	prenylcysteine oxidase farnesylcysteine lyase	F:prenylcysteine oxidase activity; F:lyase activity; P:prenylcysteine catabolic process; P:oxidation-reduction process	2	2	7.733	2	2	5.1911	5	5	19.7738	3
FOTG_06090	EXM27733	serine threonine protein kinase	F:protein serine/threonine kinase activity; F:protein binding; F:ATP binding; P:protein phosphorylation; P:serine family amino acid metabolic process	5	7	19.6534	2	4	8.3883	0	0	3.9485	2
FOTG_11018	EXM21190	uncharacterized protein FMAN_06134	-	1	3	10.1148	4	4	8.3883	3	3	13.4377	2
FOTG_16273	EXM15395	related to chitinase	-	1	3	10.1148	2	4	8.3883	3	3	13.4377	2
FOTG_11907	EXM20085	heterokaryon incompatibility protein or allele	-	3	3	10.1148	2	4	8.3883	2	3	13.4377	3
FOTG_01465	EXM34747	protein kinase rad3	F:DNA binding; F:protein serine/threonine kinase activity; F:protein binding; F:ATP binding; F:zinc ion binding; P:protein phosphorylation; P:serine family amino acid metabolic process	3	3	10.1148	4	4	8.3883	3	3	13.4377	3
FOTG_03720	EXM32140	transcription initiation factor tfiid subunit 2	C:transcription factor TFIID complex; C:cytosol; C:cell division site; F:chromatin binding; F:translation initiation factor activity; P:regulation of transcription from RNA polymerase II promoter; P:RNA polymerase II transcriptional preinitiation complex assembly; C:chromatin; C:ribosome; P:regulation of translational initiation	3	3	10.1148	0	0	1.9959	2	5	19.7738	2
FOTG_00956	EXM37126	related to midasin (aaa atpase)	C:nucleus; F:ATP binding; F:ATPase activity; P:ribosomal large subunit assembly	4	4	12.4978	8	8	14.7888	0	0	3.9485	2
FOTG_06573	EXM27222	uncharacterized protein FFUJ_09593	-	2	4	12.4978	2	8	14.7888	0	0	3.9485	2
FOTG_00581	EXM36412	v-type proton atpase catalytic subunit a	C:fungal-type vacuole membrane; C:cytosol; C:proton-transporting V-type ATPase, V1 domain; F:ATP binding; F:proton-transporting ATPase activity, rotational mechanism; P:vacuolar acidification; P:ATP hydrolysis coupled proton transport; P:cellular protein metabolic process; P:lysine homeostasis; P:histidine homeostasis; P:arginine homeostasis; P:oxidative phosphorylation	2	2	7.733	8	9	16.3902	1	1	7.1096	2
FOTG_16098	EXM15558	uncharacterized protein FMAN_11492	-	4	8	22.0409	2	2	5.1911	0	0	3.9485	2
FOTG_05378	EXM29178	dolichyl-phosphate-mannose--protein mannosyltransferase 2	C:endoplasmic reticulum membrane; F:dolichyl-phosphate-mannose-protein mannosyltransferase activity; P:protein O-linked mannosylation; C:alpha-1,6-mannosyltransferase complex	0	0	2.9728	4	6	11.5875	3	4	16.6047	2
FOTG_17107	EXM14505	related to ankyrin	-	2	4	12.4978	2	4	8.3883	2	2	10.2726	3
FOTG_02571	EXM34144	---NA---	F:catalytic activity; F:metal ion binding	4	4	12.4978	4	4	8.3883	2	2	10.2726	3
FOTG_15482	EXM16189	probable nadph2 dehydrogenase chain oye2	F:FMN binding; F:oxidoreductase activity; P:oxidation-reduction process	2	2	7.733	3	5	9.9876	2	3	13.4377	3
FOTG_09880	EXM22706	fructose-bisphosphate class ii	C:nucleus; C:mitochondrion; C:cytosol; F:fructose-bisphosphate aldolase activity; F:zinc ion binding; P:gluconeogenesis; P:glycolytic process; P:fructose metabolic process; P:mannose metabolic process; P:inositol metabolic process; P:pentose-phosphate shunt; P:carbon utilization	0	0	2.9728	4	4	8.3883	2	5	19.7738	2
FOTG_08036	EXM25064	uncharacterized protein FFUJ_09824	C:integral component of membrane	4	4	12.4978	1	2	5.1911	3	3	13.4377	2
FOTG_16337	EXM15318	protein kinase c substrate 80k-h	C:endoplasmic reticulum lumen; C:glucosidase II complex; F:alpha-1,4-glucosidase activity; F:kinase activity; P:polysaccharide biosynthetic process; P:protein N-linked glycosylation; P:N-glycan processing; P:phosphorylation; P:starch metabolic process; P:sucrose metabolic process; P:galactose metabolic process	3	4	12.4978	2	2	5.1911	2	3	13.4377	3
FOTG_00709	EXM36654	40s ribosomal protein s18	C:ribosome; F:RNA binding; F:structural constituent of ribosome; P:translation; P:ribosome biogenesis	0	0	2.9728	2	2	5.1911	5	6	22.9449	2
FOTG_02337	EXM33798	related to alkaline phosphatase family protein	C:integral component of membrane	3	4	12.4978	0	0	1.9959	4	4	16.6047	2
FOTG_00134	EXM35713	dynamin gtpase	C:fungal-type vacuole membrane; C:mitochondrial intermembrane space; C:mitochondrial crista; C:intrinsic component of mitochondrial inner membrane; C:extrinsic component of mitochondrial inner membrane; C:mitochondrial inner boundary membrane; F:GTPase activity; F:GTP binding; F:oxidoreductase activity; P:mitochondrion inheritance; P:mitochondrial genome maintenance; P:mitochondrial membrane orga…	2	3	10.1148	6	9	16.3902	0	0	3.9485	2
FOTG_00156	EXM35746	peptidyl-prolyl cis-trans isomerase b	F:peptidyl-prolyl cis-trans isomerase activity; P:protein peptidyl-prolyl isomerization; P:protein folding	1	1	5.3524	4	8	14.7888	2	2	10.2726	2
FOTG_19186	EXM12313	---NA---	-	1	1	5.3524	3	6	11.5875	2	3	13.4377	2
FOTG_04811	EXM29666	rab gtpase	C:incipient cellular bud site; C:nucleus; C:cytosol; C:transport vesicle; F:GTPase activity; F:GTP binding; P:exocytosis; P:Golgi to plasma membrane transport; P:vesicle fusion; P:autophagy; P:membrane addition at site of cytokinesis; P:small GTPase mediated signal transduction; P:ascospore-type prospore assembly	1	1	5.3524	5	6	11.5875	3	3	13.4377	2
FOTG_02407	EXM33910	prenylcysteine oxidase farnesylcysteine lyase	F:prenylcysteine oxidase activity; F:lyase activity; P:prenylcysteine catabolic process; P:oxidation-reduction process	1	1	5.3524	2	2	5.1911	5	5	19.7738	2
FOTG_10174	EXM22226	eukaryotic translation initiation factor 3 subunit c	C:cytosol; C:cytoplasmic stress granule; C:eukaryotic 43S preinitiation complex; C:eukaryotic 48S preinitiation complex; C:multi-eIF complex; C:eukaryotic translation initiation factor 3 complex, eIF3e; C:eukaryotic translation initiation factor 3 complex, eIF3m; F:translation initiation factor activity; F:translation initiation factor binding; P:formation of translation preinitiation complex; P:…	5	5	14.8818	0	0	1.9959	2	3	13.4377	2
FOTG_12204	EXM19759	related to pmu1-high copy suppressor of ts tps2 mutant phenotype	-	4	5	14.8818	0	0	1.9959	2	3	13.4377	2
FOTG_05705	EXM28394	related to integral membrane protein	C:Golgi apparatus; C:cytosol; C:integral component of membrane; P:calcium ion transmembrane import into cytosol	5	6	17.267	3	4	8.3883	0	0	3.9485	2
FOTG_16450	EXM15183	enniatin synthase	F:catalytic activity; F:phosphopantetheine binding; P:metabolic process	5	6	17.267	4	4	8.3883	0	0	3.9485	2
FOTG_06090	EXM27734	serine threonine protein kinase	F:protein serine/threonine kinase activity; F:protein binding; F:ATP binding; P:protein phosphorylation; P:serine family amino acid metabolic process	4	6	17.267	2	4	8.3883	0	0	3.9485	2
FOTG_10700	EXM21461	---NA---	-	2	4	12.4978	2	5	9.9876	1	1	7.1096	2
FOTG_02698	EXM32226	phospholipase mitochondrial	F:metal ion binding	2	2	7.733	3	6	11.5875	1	2	10.2726	2
FOTG_09025	EXM23565	related to motif-containing protein	F:protein binding	4	6	17.267	2	2	5.1911	1	1	7.1096	2
FOTG_05795	EXM28558	tyrosine 3-monooxygenase tryptophan 5-monooxygenase activation protein	F:monooxygenase activity; F:protein domain specific binding; P:oxidation-reduction process	0	0	2.9728	4	5	9.9876	3	4	16.6047	2
FOTG_05787	EXM28542	adenylate cyclase	C:mitochondrion; C:endoplasmic reticulum membrane; C:plasma membrane; F:magnesium ion binding; F:adenylate cyclase activity; F:protein binding; P:cAMP biosynthetic process; P:adenylate cyclase-modulating G-protein coupled receptor signaling pathway; P:Ras protein signal transduction; P:purine nucleobase metabolic process	0	0	2.9728	4	5	9.9876	4	4	16.6047	2
FOTG_02634	EXM34221	related to cercosporin resistance protein	C:nucleus; F:RNA polymerase II transcription factor activity, sequence-specific DNA binding; F:zinc ion binding; P:regulation of transcription from RNA polymerase II promoter	3	4	12.4978	2	3	6.7894	2	2	10.2726	3
FOTG_01636	EXM35063	sulfite reductase flavoprotein alpha-component	C:sulfite reductase complex (NADPH); F:oxidoreductase activity, acting on the aldehyde or oxo group of donors; P:sulfate assimilation; P:oxidation-reduction process	4	4	12.4978	1	3	6.7894	2	2	10.2726	2
FOTG_11037	EXM21214	related to csr1-phosphatidylinositol transfer protein	C:integral component of membrane	3	4	12.4978	2	3	6.7894	2	2	10.2726	3
FOTG_01253	EXM34399	gtpase slip-gc	-	2	2	7.733	1	4	8.3883	2	3	13.4377	2
FOTG_10514	EXM21578	uncharacterized protein FPRN_14258	-	2	2	7.733	3	4	8.3883	3	3	13.4377	3
FOTG_03577	EXM31924	related to tyrosinase precursor	F:oxidoreductase activity; F:metal ion binding; P:oxidation-reduction process	0	0	2.9728	3	3	6.7894	5	5	19.7738	2
FOTG_02938	EXM32680	transketolase	C:nucleus; C:cytosol; F:transketolase activity; F:metal ion binding; P:pentose-phosphate shunt; P:carbon utilization	0	0	2.9728	3	3	6.7894	4	5	19.7738	2
FOTG_10890	EXM21368	phospholipase c	F:hydrolase activity, acting on ester bonds; P:metabolic process	5	6	17.267	0	0	1.9959	2	2	10.2726	2
FOTG_06268	EXM28023	v-type proton atpase subunit a	C:vacuolar proton-transporting V-type ATPase, V0 domain; C:integral component of membrane; F:hydrogen ion transmembrane transporter activity; P:ATP hydrolysis coupled proton transport	2	2	7.733	2	2	5.1911	4	4	16.6047	3
FOTG_14418	EXM17310	uncharacterized protein FMAN_11057	-	2	3	10.1148	6	8	14.7888	0	0	3.9485	2
FOTG_12039	EXM20013	related to non-ribosomal peptide synthetase	F:catalytic activity; F:phosphopantetheine binding; P:metabolic process	3	3	10.1148	7	8	14.7888	0	0	3.9485	2
FOTG_00156	EXM35745	peptidyl-prolyl cis-trans isomerase b	C:integral component of membrane; F:peptidyl-prolyl cis-trans isomerase activity; P:protein peptidyl-prolyl isomerization; P:protein folding	1	1	5.3524	3	7	13.1879	2	2	10.2726	2
FOTG_14565	EXM17206	related to coq2-para-hydroxybenzoate--polyprenyltransferase	C:integral component of membrane; F:transferase activity	2	5	14.8818	2	3	6.7894	1	1	7.1096	2
FOTG_08341	EXM24862	cystathionine beta-lyase	F:catalytic activity; F:pyridoxal phosphate binding	1	1	5.3524	2	5	9.9876	2	3	13.4377	2
FOTG_02571	EXM34141	---NA---	F:catalytic activity; F:metal ion binding	3	3	10.1148	4	4	8.3883	2	2	10.2726	3
FOTG_07196	EXM26177	6-hydroxy-d-nicotine oxidase	F:oxidoreductase activity, acting on CH-OH group of donors; F:flavin adenine dinucleotide binding; P:oxidation-reduction process	5	5	14.8818	1	1	3.5932	2	2	10.2726	2
FOTG_06746	EXM26426	isoleucyl-trna cytoplasmic	C:cytosol; F:aminoacyl-tRNA editing activity; F:isoleucine-tRNA ligase activity; F:ATP binding; P:isoleucyl-tRNA aminoacylation; P:regulation of translational fidelity; P:isoleucine biosynthetic process; P:leucine biosynthetic process; P:valine biosynthetic process	4	5	14.8818	1	1	3.5932	2	2	10.2726	2
FOTG_06102	EXM27747	s-adenosylmethionine synthase	C:nucleus; C:cytosol; F:methionine adenosyltransferase activity; F:ATP binding; F:metal ion binding; P:methionine metabolic process; P:S-adenosylmethionine biosynthetic process; P:one-carbon metabolic process	3	3	10.1148	2	2	5.1911	3	3	13.4377	3
FOTG_02697	EXM32223	dna-directed rna polymerase iii subunit rpc1	C:DNA-directed RNA polymerase III complex; C:cytoplasm; F:DNA binding; F:DNA-directed 5'-3' RNA polymerase activity; P:tRNA transcription from RNA polymerase III promoter; C:nucleolus; P:purine nucleobase metabolic process; P:pyrimidine nucleobase metabolic process	3	3	10.1148	2	2	5.1911	2	3	13.4377	3
FOTG_06170	EXM27861	probable mnr2-manganese resistance protein	C:cytoplasm; C:integral component of membrane; F:magnesium ion transmembrane transporter activity; P:magnesium ion transmembrane transport	2	3	10.1148	1	2	5.1911	2	3	13.4377	2
FOTG_02452	EXM33979	leucyl-trna cytoplasmic	C:cytosol; F:aminoacyl-tRNA editing activity; F:leucine-tRNA ligase activity; F:ATP binding; P:DNA replication initiation; P:leucyl-tRNA aminoacylation; P:regulation of translational fidelity; P:regulation of TOR signaling; P:isoleucine biosynthetic process; P:leucine biosynthetic process; P:valine biosynthetic process	3	3	10.1148	0	0	1.9959	3	4	16.6047	2
FOTG_18740	EXM12778	predicted protein	-	4	4	12.4978	2	6	11.5875	0	0	3.9485	2
FOTG_12116	EXM19883	related to aliphatic nitrilase	F:hydrolase activity, acting on carbon-nitrogen (but not peptide) bonds; P:nitrogen compound metabolic process	4	4	12.4978	5	6	11.5875	0	0	3.9485	2
FOTG_09949	EXM22296	heat shock 70kda protein 4	C:nucleus; C:cytosol; F:ATP binding	0	0	2.9728	5	6	11.5875	3	3	13.4377	2
FOTG_02704	EXM32240	eukaryotic ribosomal protein l18	C:ribosome; F:structural constituent of ribosome; P:translation; P:ribosome biogenesis	0	0	2.9728	3	6	11.5875	2	3	13.4377	2
FOTG_09767	EXM22490	probable 3-ketosteroid-delta-1-dehydrogenase	F:oxidoreductase activity, acting on the CH-CH group of donors; P:oxidation-reduction process	3	4	12.4978	2	4	8.3883	1	1	7.1096	2
FOTG_06102	EXM27746	s-adenosylmethionine synthase	C:nucleus; C:cytosol; F:methionine adenosyltransferase activity; F:ATP binding; F:metal ion binding; P:methionine metabolic process; P:S-adenosylmethionine biosynthetic process; P:one-carbon metabolic process	2	2	7.733	4	5	9.9876	2	2	10.2726	3
FOTG_05528	EXM29398	myosin-1	C:myosin complex; F:motor activity; F:protein binding; F:ATP binding	2	2	7.733	5	5	9.9876	2	2	10.2726	3
FOTG_05787	EXM28545	adenylate cyclase	C:intracellular; F:magnesium ion binding; F:adenylate cyclase activity; F:protein binding; P:cAMP biosynthetic process; P:intracellular signal transduction; P:purine nucleobase metabolic process	0	0	2.9728	3	4	8.3883	4	4	16.6047	2
FOTG_15236	EXM16490	uncharacterized protein FMAN_14281	-	1	2	7.733	2	3	6.7894	2	3	13.4377	2
FOTG_12231	EXM19788	related to phosphatase homologous to the c-terminal domain of histone macroh2a1	-	1	2	7.733	2	3	6.7894	2	3	13.4377	2
FOTG_12594	EXM19339	related to pisatin demethylase cytochrome p450	C:integral component of membrane; F:monooxygenase activity; F:iron ion binding; F:methyltransferase activity; F:oxidoreductase activity, acting on paired donors, with incorporation or reduction of molecular oxygen; F:heme binding; P:methylation; P:oxidation-reduction process	1	2	7.733	3	3	6.7894	2	3	13.4377	2
FOTG_02835	EXM32507	eukaryotic translation initiation factor 3 subunit f	C:nucleus; C:cytosol; C:eukaryotic 43S preinitiation complex; C:eukaryotic 48S preinitiation complex; C:eukaryotic translation initiation factor 3 complex, eIF3e; C:eukaryotic translation initiation factor 3 complex, eIF3m; F:translation initiation factor activity; F:protein binding; P:formation of translation preinitiation complex; P:regulation of translational initiation; C:ribosome	0	0	2.9728	2	2	5.1911	4	5	19.7738	2
FOTG_13305	EXM18605	ribonuclease t2 family protein	F:RNA binding; F:ribonuclease T2 activity; P:RNA phosphodiester bond hydrolysis, endonucleolytic	2	4	12.4978	0	0	1.9959	3	3	13.4377	2
FOTG_11946	EXM20129	3-hydroxy-3-methylglutaryl-coenzyme a reductase	C:endoplasmic reticulum membrane; C:integral component of membrane; F:hydroxymethylglutaryl-CoA reductase (NADPH) activity; F:NADP binding; P:isoprenoid biosynthetic process; P:coenzyme A metabolic process; P:sterol biosynthetic process; P:oxidation-reduction process	4	5	14.8818	4	4	8.3883	0	0	3.9485	2
FOTG_03833	EXM30910	uncharacterized protein FPRN_10451	-	2	5	14.8818	2	4	8.3883	0	0	3.9485	2
FOTG_02131	EXM33488	uncharacterized protein FPRN_11307	-	2	3	10.1148	3	5	9.9876	1	1	7.1096	2
FOTG_03699	EXM32103	---NA---	-	2	3	10.1148	2	5	9.9876	1	1	7.1096	2
FOTG_15919	EXM15753	Uncharacterized protein LW94_6780	-	1	3	10.1148	3	3	6.7894	2	2	10.2726	2
FOTG_06341	EXM28133	atp-dependent rna helicase rok1	C:nucleolus; F:nucleic acid binding; F:ATP-dependent RNA helicase activity; F:ATP binding; P:endonucleolytic cleavage in ITS1 to separate SSU-rRNA from 5.8S rRNA and LSU-rRNA from tricistronic rRNA transcript (SSU-rRNA, 5.8S rRNA, LSU-rRNA); P:endonucleolytic cleavage to generate mature 5'-end of SSU-rRNA from (SSU-rRNA, 5.8S rRNA, LSU-rRNA); P:endonucleolytic cleavage in 5'-ETS of tricistronic r…	2	3	10.1148	1	1	3.5932	3	3	13.4377	2
FOTG_04352	EXM30350	---NA---	-	4	4	12.4978	5	5	9.9876	0	0	3.9485	2
FOTG_17511	EXM14065	---NA---	-	3	4	12.4978	5	5	9.9876	0	0	3.9485	2
FOTG_10331	EXM22049	probable cell cycle control protein cwf19	F:catalytic activity	2	4	12.4978	3	5	9.9876	0	0	3.9485	2
FOTG_10297	EXM22012	cyclopropane-fatty-acyl-phospholipid synthase	C:integral component of membrane; F:methyltransferase activity; P:methylation	2	2	7.733	4	6	11.5875	1	1	7.1096	2
FOTG_12789	EXM19171	related to ankyrin	F:protein binding	0	0	2.9728	5	5	9.9876	3	3	13.4377	2
FOTG_11033	EXM21208	#NAME?	C:1,3-beta-D-glucan synthase complex; C:integral component of membrane; F:1,3-beta-D-glucan synthase activity; P:(1->3)-beta-D-glucan biosynthetic process; P:starch metabolic process; P:sucrose metabolic process	0	0	2.9728	5	5	9.9876	3	3	13.4377	2
FOTG_08707	EXM24246	uncharacterized protein FFUJ_01169	-	4	4	12.4978	2	3	6.7894	1	1	7.1096	2
FOTG_01760	EXM35258	cell wall protein	-	2	2	7.733	3	4	8.3883	2	2	10.2726	3
FOTG_17752	EXM13816	---NA---	F:protein binding	2	2	7.733	3	4	8.3883	1	2	10.2726	2
FOTG_08006	EXM25009	related to pho87 protein	C:intracellular; C:HOPS complex; F:protein binding; P:intracellular protein transport; P:vesicle-mediated transport; P:vacuole fusion	2	2	7.733	4	4	8.3883	1	2	10.2726	2
FOTG_01399	EXM34612	woronin body major protein	F:translation elongation factor activity; F:ribosome binding; P:positive regulation of translational elongation; P:positive regulation of translational termination; C:ribosome	2	2	7.733	4	4	8.3883	1	2	10.2726	2
FOTG_17244	EXM14342	related to ankyrin 3	F:catalytic activity; F:protein binding; P:nucleoside metabolic process	2	2	7.733	3	4	8.3883	2	2	10.2726	3
FOTG_15620	EXM16029	uncharacterized protein FPRN_13467	-	2	2	7.733	2	4	8.3883	1	2	10.2726	2
FOTG_05806	EXM28576	threonyl-trna synthetase	C:cytosol; F:threonine-tRNA ligase activity; F:ATP binding; P:cytoplasmic translation; P:threonyl-tRNA aminoacylation; P:glycine metabolic process; P:L-serine metabolic process; P:threonine metabolic process	0	0	2.9728	2	3	6.7894	4	4	16.6047	2
FOTG_14160	EXM17626	phosphatidylinositol class t	C:GPI-anchor transamidase complex; F:GPI-anchor transamidase activity; P:attachment of GPI anchor to protein	0	0	2.9728	3	3	6.7894	3	4	16.6047	2
FOTG_10411	EXM21813	adp-ribosylation factor 6	C:intracellular; F:GTP binding; P:small GTPase mediated signal transduction	2	2	7.733	2	2	5.1911	2	3	13.4377	3
FOTG_06198	EXM27902	mrna 3 -end-processing protein rna14	C:mitochondrion; C:cytosol; C:mRNA cleavage factor complex; F:protein heterodimerization activity; P:mRNA polyadenylation; P:mRNA cleavage; P:response to DNA damage checkpoint signaling	2	2	7.733	0	0	1.9959	3	4	16.6047	2
FOTG_07952	EXM24911	related to phosphatidic acid-preferring phospholipase a1	C:nucleus; C:cytosol; F:metal ion binding	2	2	7.733	0	0	1.9959	4	4	16.6047	2
FOTG_08974	EXM24043	probable kex protein	C:trans-Golgi network; C:integral component of membrane; F:serine-type endopeptidase activity; P:proteolysis; P:peptide pheromone maturation	2	2	7.733	0	0	1.9959	3	4	16.6047	2
FOTG_03041	EXM32843	carboxypeptidase d	C:integral component of membrane; F:serine-type carboxypeptidase activity; P:proteolysis	2	2	7.733	0	0	1.9959	3	4	16.6047	2
FOTG_05527	EXM29396	related to capsular associated protein	C:integral component of membrane; F:transferase activity	2	3	10.1148	3	6	11.5875	0	0	3.9485	2
FOTG_07352	EXM26351	atpase	C:integral component of membrane; F:ATP binding; F:ATPase activity, coupled to transmembrane movement of substances; P:transmembrane transport	3	3	10.1148	5	6	11.5875	0	0	3.9485	2
FOTG_02910	EXM32636	related to u3 snornp protein	C:small nucleolar ribonucleoprotein complex; C:Mpp10 complex; P:rRNA processing	3	3	10.1148	3	6	11.5875	0	0	3.9485	2
FOTG_13053	EXM18872	multidrug pheromone exporter	C:integral component of membrane; F:ATP binding; F:ATPase activity, coupled to transmembrane movement of substances; P:transmembrane transport	3	3	10.1148	5	6	11.5875	0	0	3.9485	2
FOTG_04171	EXM31474	dna-directed rna mitochondrial	F:DNA binding; F:DNA-directed 5'-3' RNA polymerase activity; P:transcription, DNA-templated; C:nucleolus; P:purine nucleobase metabolic process; P:pyrimidine nucleobase metabolic process	4	5	14.8818	2	3	6.7894	0	0	3.9485	2
FOTG_08843	EXM23884	l-xylulose reductase	F:L-xylulose reductase (NADP+) activity; F:mannitol 2-dehydrogenase (NADP+) activity; P:xylulose metabolic process; P:glucose metabolic process; P:protein homotetramerization; P:oxidation-reduction process; P:fructose metabolic process; P:mannose metabolic process	3	3	10.1148	3	4	8.3883	1	1	7.1096	2
FOTG_07093	EXM26065	anhydro-n-acetylmuramic acid kinase	F:ATP binding; F:metallopeptidase activity; F:kinase activity; F:phosphotransferase activity, alcohol group as acceptor; P:amino sugar metabolic process; P:proteolysis; P:peptidoglycan turnover; P:phosphorylation	3	3	10.1148	3	4	8.3883	1	1	7.1096	2
FOTG_02263	EXM33678	guanosine-diphosphatase	C:integral component of membrane; F:guanosine-diphosphatase activity; F:uridine-diphosphatase activity	1	1	5.3524	3	5	9.9876	2	2	10.2726	2
FOTG_02490	EXM34049	alpha -glucosidase	C:endoplasmic reticulum lumen; F:carbohydrate binding; F:glucan 1,3-alpha-glucosidase activity; P:carbohydrate metabolic process; P:fungal-type cell wall biogenesis	1	1	5.3524	3	3	6.7894	3	3	13.4377	2
FOTG_12403	EXM19548	galactose oxidase	F:protein binding; F:galactose oxidase activity; P:oxidation-reduction process; P:galactose metabolic process	2	3	10.1148	0	0	1.9959	2	3	13.4377	2
FOTG_05784	EXM28533	ubiquitin thiolesterase	F:thiol-dependent ubiquitinyl hydrolase activity; P:ubiquitin-dependent protein catabolic process; P:protein deubiquitination	2	3	10.1148	0	0	1.9959	2	3	13.4377	2
FOTG_03471	EXM31763	---NA---	C:integral component of membrane; F:ATP binding; F:ATPase activity, coupled to transmembrane movement of substances; P:transmembrane transport	2	3	10.1148	0	0	1.9959	3	3	13.4377	2
FOTG_07397	EXM26397	e3 ubiquitin-protein ligase listerin	F:zinc ion binding; F:ligase activity	2	2	7.733	3	7	13.1879	0	0	3.9485	2
FOTG_18232	EXM13315	unnamed protein product	-	2	2	7.733	4	7	13.1879	0	0	3.9485	2
FOTG_02909	EXM32633	hat1-interacting factor 1	C:chromosome, centromeric region; C:nucleoplasm; F:protein binding; P:mitotic sister chromatid segregation; P:chromatin silencing at centromere; P:CENP-A containing nucleosome assembly; P:chromatin maintenance	3	4	12.4978	4	4	8.3883	0	0	3.9485	2
FOTG_12309	EXM19654	non-ribosomal peptide synthetase	F:catalytic activity; P:metabolic process	3	4	12.4978	3	4	8.3883	0	0	3.9485	2
FOTG_11481	EXM20600	related to synaptic vesicle transporter sv2 (major facilitator superfamily)	C:integral component of membrane; F:transmembrane transporter activity; P:transmembrane transport	3	4	12.4978	3	4	8.3883	0	0	3.9485	2
FOTG_12106	EXM19871	beta-fructofuranosidase	F:hydrolase activity, hydrolyzing O-glycosyl compounds; P:carbohydrate metabolic process	3	4	12.4978	2	4	8.3883	0	0	3.9485	2
FOTG_08274	EXM24786	uncharacterized protein FMAN_06902	-	2	2	7.733	2	5	9.9876	1	1	7.1096	2
FOTG_09897	EXM22736	coatomer beta subunit	C:Golgi membrane; C:cytosol; C:COPI vesicle coat; F:structural molecule activity; F:binding; P:intracellular protein transport; P:ER to Golgi vesicle-mediated transport	2	2	7.733	5	5	9.9876	1	1	7.1096	2
FOTG_09007	EXM23540	malate mitochondrial	C:mitochondrial matrix; F:mRNA binding; F:L-malate dehydrogenase activity; P:chronological cell aging; P:replicative cell aging; P:carbohydrate metabolic process; P:malate metabolic process; P:pyruvate metabolic process; P:reductive tricarboxylic acid cycle; P:glyoxylate metabolic process	0	0	2.9728	4	4	8.3883	3	3	13.4377	2
FOTG_00355	EXM36040	protein disulfide-isomerase erp38	C:endoplasmic reticulum; F:isomerase activity; P:cell redox homeostasis	0	0	2.9728	2	4	8.3883	3	3	13.4377	2
FOTG_13282	EXM18585	mfs sp general alpha glucoside:h+ symporter	C:integral component of membrane; F:substrate-specific transmembrane transporter activity; P:transmembrane transport	2	4	12.4978	2	2	5.1911	1	1	7.1096	2
FOTG_02961	EXM32722	#NAME?	C:plasma membrane; C:fungal-type cell wall; C:integral component of membrane; C:anchored component of membrane; F:hydrolase activity; F:1,3-beta-glucanosyltransferase activity; P:(1->3)-beta-D-glucan metabolic process	1	2	7.733	3	3	6.7894	2	2	10.2726	2
FOTG_08006	EXM25010	vam6 vps39-like protein	C:intracellular; C:HOPS complex; F:protein binding; P:intracellular protein transport; P:vesicle-mediated transport; P:vacuole fusion	2	2	7.733	3	3	6.7894	1	2	10.2726	2
FOTG_12493	EXM19442	related to multidrug resistance protein	C:integral component of membrane; F:ATP binding; F:ATPase activity, coupled to transmembrane movement of substances; P:transmembrane transport	1	2	7.733	2	3	6.7894	2	2	10.2726	2
FOTG_05528	EXM29399	myosin-1	C:myosin complex; F:motor activity; F:protein binding; F:ATP binding	2	2	7.733	3	3	6.7894	2	2	10.2726	3
FOTG_03646	EXM32039	6-phosphofructokinase	F:6-phosphofructokinase activity; F:ATP binding; F:metal ion binding; P:fructose 6-phosphate metabolic process; P:glycolytic process through fructose-6-phosphate; C:6-phosphofructokinase complex; P:fructose metabolic process; P:galactose metabolic process; P:mannose metabolic process; P:gluconeogenesis; P:pentose-phosphate shunt	0	0	2.9728	2	2	5.1911	3	4	16.6047	2
FOTG_08812	EXM23850	related to 6-hydroxy-d-nicotine oxidase	F:oxidoreductase activity, acting on CH-OH group of donors; F:flavin adenine dinucleotide binding; P:oxidation-reduction process	0	0	2.9728	2	2	5.1911	2	4	16.6047	2
FOTG_06131	EXM27795	tubulin alpha chain	C:cytoplasm; C:microtubule; F:GTPase activity; F:structural constituent of cytoskeleton; F:GTP binding; P:microtubule-based process	0	0	2.9728	2	2	5.1911	3	4	16.6047	2
FOTG_17028	EXM14586	zinc-binding dehydrogenase	F:zinc ion binding; F:oxidoreductase activity; P:oxidation-reduction process	0	0	2.9728	2	2	5.1911	2	4	16.6047	2
FOTG_04352	EXM30348	---NA---	-	3	3	10.1148	5	5	9.9876	0	0	3.9485	2
FOTG_00008	EXM35543	transcription elongation factor spt5	C:integral component of membrane; C:DSIF complex; F:transcription factor activity, core RNA polymerase II binding; F:RNA polymerase II core binding; F:RNA polymerase I core binding; F:RNA polymerase I transcription factor binding; F:transcription factor activity, core RNA polymerase I binding; F:translation elongation factor activity; F:amino acid transmembrane transporter activity; F:rRNA bindin…	3	3	10.1148	2	5	9.9876	0	0	3.9485	2
FOTG_06231	EXM27962	replication factor c subunit 1	C:DNA replication factor C complex; F:DNA clamp loader activity; F:ATP binding; P:DNA replication; P:DNA repair; C:DNA polymerase complex	5	5	14.8818	2	2	5.1911	0	0	3.9485	2
FOTG_09022	EXM23561	uncharacterized protein FMAN_07943	-	5	5	14.8818	2	2	5.1911	0	0	3.9485	2
FOTG_17016	EXM14600	recq family partial	F:nucleic acid binding; F:helicase activity; F:ATP binding	5	5	14.8818	2	2	5.1911	0	0	3.9485	2
FOTG_02972	EXM32743	related to sporulation-specific gene sps2	-	2	3	10.1148	2	3	6.7894	1	1	7.1096	2
FOTG_08707	EXM24249	uncharacterized protein LW94_2078	-	3	3	10.1148	2	3	6.7894	1	1	7.1096	2
FOTG_02355	EXM33832	related to nuo-14 nadh2 dehydrogenase 14k chain	-	3	3	10.1148	3	3	6.7894	1	1	7.1096	2
FOTG_02828	EXM32499	delta-aminolevulinic acid dehydratase	F:porphobilinogen synthase activity; F:metal ion binding; P:porphyrin-containing compound biosynthetic process; P:chlorophyll metabolic process	2	3	10.1148	3	3	6.7894	1	1	7.1096	2
FOTG_04864	EXM29739	nucleolar gtp-binding protein	C:nucleolus; C:preribosome, large subunit precursor; F:GTP binding; F:hydrolase activity; P:ribosomal subunit export from nucleus; P:rRNA processing; P:ribosomal large subunit biogenesis; P:assembly of large subunit precursor of preribosome	1	1	5.3524	2	4	8.3883	2	2	10.2726	2
FOTG_00982	EXM37172	serine threonine-protein phosphatase pp1	C:protein phosphatase type 1 complex; C:condensed nuclear chromosome kinetochore; C:nuclear chromatin; C:mating projection base; C:nucleolus; C:spindle pole body; C:cytosol; C:mRNA cleavage and polyadenylation specificity factor complex; C:cellular bud neck; C:cell cortex; C:endocytic vesicle; C:cell division site; C:growing cell tip; C:non-growing cell tip; C:CENP-A containing chromatin; C:PTW/P…	1	1	5.3524	4	4	8.3883	2	2	10.2726	2
FOTG_12995	EXM19016	nfx1-type zinc finger-containing protein 1	F:metal ion binding	1	1	5.3524	4	4	8.3883	2	2	10.2726	2
FOTG_01345	EXM34519	lysyl-trna synthetase	C:cytoplasm; F:nucleic acid binding; F:lysine-tRNA ligase activity; F:ATP binding; P:lysyl-tRNA aminoacylation; P:lysine biosynthetic process	1	1	5.3524	2	2	5.1911	3	3	13.4377	2
FOTG_01582	EXM34954	related to ribosomal protein s7	C:mitochondrial small ribosomal subunit; P:translation	3	3	10.1148	1	1	3.5932	2	2	10.2726	2
FOTG_10280	EXM21991	beta-galactosidase	F:beta-galactosidase activity; P:galactose metabolic process; P:glycosaminoglycan catabolic process; P:glycosphingolipid metabolic process; C:beta-galactosidase complex; P:glycerolipid metabolic process	2	3	10.1148	1	1	3.5932	2	2	10.2726	2
FOTG_01746	EXM35239	long-chain acyl- synthetase	F:ligase activity; P:metabolic process	3	4	12.4978	3	3	6.7894	0	0	3.9485	2
FOTG_15706	EXM15991	related to paf acetylhydrolase family protein	F:1-alkyl-2-acetylglycerophosphocholine esterase activity; P:lipid catabolic process; C:1-alkyl-2-acetylglycerophosphocholine esterase complex; P:glycerolipid metabolic process	3	4	12.4978	3	3	6.7894	0	0	3.9485	2
FOTG_00765	EXM36765	tyrosine 3-monooxygenase tryptophan 5-monooxygenase activation protein	F:monooxygenase activity; F:protein domain specific binding; P:oxidation-reduction process	0	0	2.9728	4	5	9.9876	2	2	10.2726	2
FOTG_00195	EXM35815	elongation factor 1-gamma	C:integral component of membrane; F:translation elongation factor activity; F:protein binding; F:transferase activity; C:ribosome; P:regulation of translational elongation	0	0	2.9728	5	5	9.9876	2	2	10.2726	2
FOTG_04600	EXM30711	zinc-binding dehydrogenase-like protein	F:zinc ion binding; F:oxidoreductase activity; P:oxidation-reduction process	2	2	7.733	2	4	8.3883	1	1	7.1096	2
FOTG_03696	EXM32100	dna helicase	-	2	2	7.733	3	4	8.3883	1	1	7.1096	2
FOTG_07868	EXM25453	nuclear segregation protein	C:endoplasmic reticulum; C:cytosol; C:polysome; C:nuclear outer membrane-endoplasmic reticulum membrane network; F:RNA binding; P:regulation of mitotic nuclear division; P:meiotic nuclear division; P:intracellular mRNA localization; P:mRNA metabolic process	2	2	7.733	4	4	8.3883	1	1	7.1096	2
FOTG_09336	EXM23495	related to aspartic-type signal peptidase	F:aspartic-type endopeptidase activity; P:proteolysis	2	2	7.733	3	4	8.3883	1	1	7.1096	2
FOTG_09007	EXM23539	malate mitochondrial	C:mitochondrial matrix; F:mRNA binding; F:L-malate dehydrogenase activity; P:chronological cell aging; P:replicative cell aging; P:carbohydrate metabolic process; P:malate metabolic process; P:pyruvate metabolic process; P:reductive tricarboxylic acid cycle; P:glyoxylate metabolic process	0	0	2.9728	3	3	6.7894	3	3	13.4377	2
FOTG_05239	EXM28990	related to transcription factor kcs1	F:inositol-1,3,4,5,6-pentakisphosphate kinase activity; F:inositol hexakisphosphate kinase activity; F:inositol heptakisphosphate kinase activity; F:inositol-1,4,5-trisphosphate 3-kinase activity; P:regulation of inositol phosphate biosynthetic process; P:phosphorylation	0	0	2.9728	2	3	6.7894	2	3	13.4377	2
FOTG_05976	EXM27494	related to phytase	C:integral component of membrane; F:acid phosphatase activity; P:dephosphorylation; P:riboflavin metabolic process; P:hexachlorocyclohexane metabolic process	0	0	2.9728	3	3	6.7894	3	3	13.4377	2
FOTG_05931	EXM28820	murein transglycosylase	-	2	2	7.733	1	2	5.1911	2	2	10.2726	2
FOTG_04160	EXM31457	dimethylaniline monooxygenase (n-oxide forming)	F:N,N-dimethylaniline monooxygenase activity; F:flavin adenine dinucleotide binding; F:NADP binding; P:oxidation-reduction process	2	2	7.733	2	2	5.1911	1	2	10.2726	2
FOTG_07066	EXM26882	adp-ribosylation factor family protein	F:GTP binding	2	2	7.733	0	0	1.9959	3	3	13.4377	2
FOTG_11946	EXM20131	3-hydroxy-3-methylglutaryl-coenzyme a reductase	C:endoplasmic reticulum membrane; C:integral component of membrane; F:hydroxymethylglutaryl-CoA reductase (NADPH) activity; F:NADP binding; P:isoprenoid biosynthetic process; P:coenzyme A metabolic process; P:sterol biosynthetic process; P:oxidation-reduction process	3	3	10.1148	4	4	8.3883	0	0	3.9485	2
FOTG_00027	EXM35565	phosphopantetheine adenylyltransferase	C:nucleus; C:CoA-synthesizing protein complex; F:nucleotidyltransferase activity; P:coenzyme A biosynthetic process	3	3	10.1148	3	4	8.3883	0	0	3.9485	2
FOTG_11656	EXM20534	related to phosphoglycerate mutase	-	2	3	10.1148	2	2	5.1911	1	1	7.1096	2
FOTG_04876	EXM29763	uncharacterized protein FPRO_02504	F:protein binding	3	3	10.1148	2	2	5.1911	1	1	7.1096	2
FOTG_06579	EXM27230	related to mg2 transporter -like	C:integral component of membrane; F:metal ion transmembrane transporter activity; P:metal ion transport; P:transmembrane transport	3	3	10.1148	2	2	5.1911	1	1	7.1096	2
FOTG_08427	EXM24416	related to gip2 glc7p-interacting protein	F:protein binding	1	1	5.3524	3	3	6.7894	2	2	10.2726	2
FOTG_10427	EXM21831	uncharacterized protein PAC_08503	F:protein kinase activity; F:ATP binding; P:protein phosphorylation	1	1	5.3524	2	3	6.7894	2	2	10.2726	2
FOTG_17435	EXM14131	---NA---	-	1	1	5.3524	3	3	6.7894	2	2	10.2726	2
FOTG_09029	EXM23571	ras small monomeric gtpase rab6	C:cytosol; F:GTPase activity; F:GTP binding; P:intracellular protein transport; P:small GTPase mediated signal transduction; P:retrograde transport, endosome to Golgi	1	1	5.3524	2	3	6.7894	2	2	10.2726	2
FOTG_10349	EXM21728	uncharacterized protein FPRO_12913	-	1	1	5.3524	2	3	6.7894	2	2	10.2726	2
FOTG_12766	EXM19147	udp-glucoronosyl and udp-glucosyl	C:integral component of membrane; F:transferase activity, transferring hexosyl groups; P:metabolic process	1	1	5.3524	2	3	6.7894	2	2	10.2726	2
FOTG_03611	EXM31986	related to scp160 protein	F:RNA binding	3	3	10.1148	0	0	1.9959	2	2	10.2726	2
FOTG_07599	EXM25884	related to integral membrane protein	-	3	3	10.1148	0	0	1.9959	2	2	10.2726	2
FOTG_07576	EXM25843	related to duf726 domain protein	-	2	2	7.733	5	5	9.9876	0	0	3.9485	2
FOTG_00079	EXM35626	---NA---	F:catalytic activity; F:protein binding; P:nucleoside metabolic process	2	2	7.733	4	5	9.9876	0	0	3.9485	2
FOTG_00581	EXM36413	v-type proton atpase catalytic subunit a	C:fungal-type vacuole membrane; C:cytosol; C:proton-transporting V-type ATPase, V1 domain; F:ATP binding; F:proton-transporting ATPase activity, rotational mechanism; P:vacuolar acidification; P:ATP hydrolysis coupled proton transport; P:cellular protein metabolic process; P:lysine homeostasis; P:histidine homeostasis; P:arginine homeostasis; P:oxidative phosphorylation	2	2	7.733	5	5	9.9876	0	0	3.9485	2
FOTG_17356	EXM14219	---NA---	-	2	2	7.733	5	5	9.9876	0	0	3.9485	2
FOTG_01301	EXM34464	related to cornifin b	-	0	0	2.9728	4	4	8.3883	2	2	10.2726	2
FOTG_02466	EXM34001	serine threonine protein kinase	C:intracellular; F:phosphorelay sensor kinase activity; F:protein serine/threonine kinase activity; F:protein binding; F:ATP binding; P:phosphorelay signal transduction system; P:signal transduction by protein phosphorylation; C:protein histidine kinase complex; P:serine family amino acid metabolic process	0	0	2.9728	4	4	8.3883	2	2	10.2726	2
FOTG_09949	EXM22298	heat shock 70kda protein 4	C:nucleus; C:cytosol; F:ATP binding	0	0	2.9728	4	4	8.3883	2	2	10.2726	2
FOTG_02758	EXM32362	uncharacterized protein FPRN_07869	C:integral component of membrane	0	0	2.9728	4	4	8.3883	2	2	10.2726	2
FOTG_00195	EXM35819	elongation factor 1-gamma	C:integral component of membrane; F:translation elongation factor activity; F:transferase activity; C:ribosome; P:regulation of translational elongation	0	0	2.9728	4	4	8.3883	2	2	10.2726	2
FOTG_17879	EXM13681	related to nitrate assimilation regulatory protein nira	C:nucleus; F:RNA polymerase II transcription factor activity, sequence-specific DNA binding; F:DNA binding; F:zinc ion binding; P:regulation of transcription from RNA polymerase II promoter	0	0	2.9728	4	4	8.3883	2	2	10.2726	2
FOTG_07435	EXM25599	dna repair and recombination protein rad54 and rad54-like protein	C:PAS complex; F:binding; P:regulation of lipid kinase activity	2	2	7.733	2	3	6.7894	1	1	7.1096	2
FOTG_14928	EXM16800	uncharacterized protein FMAN_13358	F:3-beta-hydroxy-delta5-steroid dehydrogenase activity; F:coenzyme binding; P:steroid biosynthetic process; P:oxidation-reduction process; P:C21-steroid hormone metabolic process; P:androgen metabolic process; P:estrogen metabolic process	2	2	7.733	2	3	6.7894	1	1	7.1096	2
FOTG_03936	EXM31093	related to nitrate assimilation regulatory protein nira	C:nucleus; F:RNA polymerase II transcription factor activity, sequence-specific DNA binding; F:DNA binding; F:zinc ion binding; P:regulation of transcription from RNA polymerase II promoter	2	2	7.733	3	3	6.7894	1	1	7.1096	2
FOTG_04512	EXM30577	peptidyl-prolyl cis-trans mitochondrial	C:mitochondrion; F:peptidyl-prolyl cis-trans isomerase activity; P:protein peptidyl-prolyl isomerization; P:protein folding; P:apoptotic process	2	2	7.733	2	3	6.7894	1	1	7.1096	2
FOTG_06609	EXM27271	uncharacterized protein FMAN_12633	-	2	2	7.733	3	3	6.7894	1	1	7.1096	2
FOTG_01747	EXM35242	ubiquitin carboxyl-terminal hydrolase	F:thiol-dependent ubiquitinyl hydrolase activity; P:protein deubiquitination	2	2	7.733	3	3	6.7894	1	1	7.1096	2
FOTG_00350	EXM36034	50s ribosomal protein l4e	C:ribosome; F:structural constituent of ribosome; P:translation; P:ribosome biogenesis	0	0	2.9728	2	2	5.1911	3	3	13.4377	2
FOTG_19153	EXM12346	uncharacterized protein FFUJ_04325	-	0	0	2.9728	2	2	5.1911	2	3	13.4377	2
FOTG_17951	EXM13607	ycfa-like protein domain-containing protein	F:mRNA binding	0	0	2.9728	2	2	5.1911	3	3	13.4377	2
FOTG_05741	EXM28465	e3 ubiquitin-protein ligase ubr1	F:zinc ion binding; F:ligase activity; P:protein catabolic process	0	0	2.9728	2	2	5.1911	2	3	13.4377	2
FOTG_13307	EXM18607	related to large-conductance mechanosensitive channel	C:integral component of membrane	0	0	2.9728	2	2	5.1911	2	3	13.4377	2
FOTG_04344	EXM30324	tubulin alpha chain	C:cytoplasm; C:microtubule; F:GTPase activity; F:structural constituent of cytoskeleton; F:GTP binding; P:microtubule-based process	0	0	2.9728	2	2	5.1911	3	3	13.4377	2
FOTG_02333	EXM33788	related to rhamnogalacturonate lyase precursor	F:lyase activity; F:carbohydrate binding; P:carbohydrate metabolic process	0	0	2.9728	2	2	5.1911	2	3	13.4377	2
FOTG_12741	EXM19285	related to the plant pr-1 class of pathogen related proteins	-	2	2	7.733	1	1	3.5932	2	2	10.2726	2
FOTG_05845	EXM28636	beta-n-acetylhexosaminidase	F:beta-N-acetylhexosaminidase activity; P:carbohydrate metabolic process; P:globoside metabolic process; P:glycosaminoglycan catabolic process; P:amino sugar metabolic process	2	2	7.733	1	1	3.5932	2	2	10.2726	2
FOTG_03465	EXM31747	cullin 1	C:cullin-RING ubiquitin ligase complex; F:ubiquitin protein ligase binding; P:ubiquitin-dependent protein catabolic process	2	2	7.733	1	1	3.5932	2	2	10.2726	2
FOTG_17948	EXM13604	related to adenine phosphoribosyltransferase	C:cytoplasm; F:phosphomevalonate kinase activity; F:oxidoreductase activity, acting on CH-OH group of donors; F:transferase activity, transferring glycosyl groups; F:flavin adenine dinucleotide binding; P:cholesterol biosynthetic process; P:nucleoside metabolic process; P:phosphorylation; P:oxidation-reduction process	2	2	7.733	1	1	3.5932	2	2	10.2726	2
FOTG_12196	EXM19747	uncharacterized protein FPRN_12228	-	2	2	7.733	1	1	3.5932	2	2	10.2726	2
FOTG_14221	EXM17708	sterol 3beta-glucosyltransferase	C:membrane; F:sterol 3-beta-glucosyltransferase activity; P:carbohydrate metabolic process; P:protein transport; P:sterol biosynthetic process; P:lipid glycosylation	3	3	10.1148	2	3	6.7894	0	0	3.9485	2
FOTG_01951	EXM33258	probable succinyl- 3-ketoacid-coenzyme a mitochondrial precursor	F:metallocarboxypeptidase activity; F:zinc ion binding; F:CoA-transferase activity; P:proteolysis; P:ketone body catabolic process	3	3	10.1148	3	3	6.7894	0	0	3.9485	2
FOTG_05321	EXM29084	related to 3-oxoadipate enol-lactonase i	-	2	3	10.1148	3	3	6.7894	0	0	3.9485	2
FOTG_10468	EXM21878	carbonic anhydrase	C:mitochondrial intermembrane space; F:carbonate dehydratase activity; F:zinc ion binding; P:carbon utilization; P:cellular response to oxidative stress; P:cellular response to carbon dioxide; P:one-carbon metabolic process; P:nitrogen compound metabolic process	3	3	10.1148	2	3	6.7894	0	0	3.9485	2
FOTG_17843	EXM13715	---NA---	-	3	3	10.1148	2	3	6.7894	0	0	3.9485	2
FOTG_01377	EXM34583	myosin heavy chain	-	3	3	10.1148	3	3	6.7894	0	0	3.9485	2
FOTG_08401	EXM24386	related to alpha-l-arabinofuranosidase a precursor	F:alpha-L-arabinofuranosidase activity; P:L-arabinose metabolic process; P:nucleotide metabolic process	3	3	10.1148	3	3	6.7894	0	0	3.9485	2
FOTG_06316	EXM28090	related to sensory transduction histidine kinase	C:intracellular; F:phosphorelay sensor kinase activity; P:phosphorelay signal transduction system; P:signal transduction by protein phosphorylation; C:protein histidine kinase complex	3	3	10.1148	3	3	6.7894	0	0	3.9485	2
FOTG_13741	EXM18178	sterol 24-c-methyltransferase	F:sterol 24-C-methyltransferase activity; P:sterol biosynthetic process; P:methylation	2	3	10.1148	3	3	6.7894	0	0	3.9485	2
FOTG_07971	EXM24956	2-oxoglutarate mitochondrial	C:mitochondrial oxoglutarate dehydrogenase complex; C:mitochondrial nucleoid; F:oxoglutarate dehydrogenase (succinyl-transferring) activity; F:thiamine pyrophosphate binding; P:tricarboxylic acid cycle; P:lysine catabolic process; P:tryptophan metabolic process	1	1	5.3524	2	2	5.1911	2	2	10.2726	2
FOTG_08025	EXM25044	wd repeat-containing protein	F:protein binding	1	1	5.3524	2	2	5.1911	2	2	10.2726	2
FOTG_13132	EXM18772	uncharacterized protein Y057_2094	C:nucleus; F:RNA polymerase II transcription factor activity, sequence-specific DNA binding; F:zinc ion binding; P:regulation of transcription from RNA polymerase II promoter	2	2	7.733	3	4	8.3883	0	0	3.9485	2
FOTG_13357	EXM18541	abc-2 type transporter	C:plasma membrane; C:integral component of membrane; F:ATP binding; F:ATPase activity, coupled to transmembrane movement of substances; P:transmembrane transport	2	2	7.733	4	4	8.3883	0	0	3.9485	2
FOTG_16558	EXM15083	telomere-linked helicase 1	F:nucleic acid binding; F:ATP binding	2	2	7.733	4	4	8.3883	0	0	3.9485	2
FOTG_08474	EXM24474	uncharacterized protein LW93_1599	C:integral component of membrane	2	2	7.733	4	4	8.3883	0	0	3.9485	2
FOTG_12406	EXM19550	beta-galactosidase	C:beta-galactosidase complex; F:beta-galactosidase activity; F:carbohydrate binding; P:galactose metabolic process; P:glycosaminoglycan catabolic process; P:glycosphingolipid metabolic process; P:glycerolipid metabolic process	2	2	7.733	3	4	8.3883	0	0	3.9485	2
FOTG_00705	EXM36650	zinc finger domain-containing protein	F:metal ion binding	2	2	7.733	2	4	8.3883	0	0	3.9485	2
FOTG_02743	EXM32330	related to lactobacillus histidine protein kinase	C:integral component of membrane; F:kinase activity; P:phosphorylation	2	2	7.733	4	4	8.3883	0	0	3.9485	2
FOTG_07714	EXM26055	related to bnr asp-box repeat domain protein	-	2	2	7.733	3	4	8.3883	0	0	3.9485	2
FOTG_10659	EXM21419	copper amine oxidase 1	F:copper ion binding; F:primary amine oxidase activity; F:quinone binding; P:amine metabolic process; P:oxidation-reduction process	2	2	7.733	4	4	8.3883	0	0	3.9485	2
FOTG_02955	EXM32712	related to vps62-vacuolar protein sorting	-	0	0	2.9728	3	3	6.7894	2	2	10.2726	2
FOTG_03510	EXM31829	isocitrate dehydrogenase	C:mitochondrial isocitrate dehydrogenase complex (NAD+); F:magnesium ion binding; F:isocitrate dehydrogenase (NAD+) activity; F:NAD binding; P:tricarboxylic acid cycle	0	0	2.9728	2	3	6.7894	2	2	10.2726	2
FOTG_01753	EXM35251	hsp70 family protein	F:ATP binding	0	0	2.9728	3	3	6.7894	2	2	10.2726	2
FOTG_09251	EXM23370	probable ami1 protein	C:cell cortex; F:protein binding; F:phospholipid binding; P:cortical protein anchoring	0	0	2.9728	3	3	6.7894	2	2	10.2726	2
FOTG_10448	EXM21855	related to serine-type carboxypeptidase f precursor	F:serine-type carboxypeptidase activity; P:proteolysis	0	0	2.9728	2	3	6.7894	2	2	10.2726	2
FOTG_04040	EXM31291	related to zn 2cys6 transcriptional activator	C:nucleus; F:RNA polymerase II transcription factor activity, sequence-specific DNA binding; F:DNA binding; F:zinc ion binding; P:regulation of transcription from RNA polymerase II promoter	0	0	2.9728	2	3	6.7894	2	2	10.2726	2
FOTG_19072	EXM12427	---NA---	F:protein binding	0	0	2.9728	2	3	6.7894	2	2	10.2726	2
FOTG_05066	EXM30035	c6 transcription factor	C:nucleus; C:integral component of membrane; F:RNA polymerase II transcription factor activity, sequence-specific DNA binding; F:zinc ion binding; P:regulation of transcription from RNA polymerase II promoter	2	2	7.733	2	2	5.1911	1	1	7.1096	2
FOTG_09863	EXM22686	related to glutamate carboxypeptidase ii	C:integral component of membrane; F:carboxypeptidase activity; P:proteolysis	2	2	7.733	2	2	5.1911	1	1	7.1096	2
FOTG_04874	EXM29760	heat shock 70 kda protein	F:ATP binding; F:unfolded protein binding; P:protein folding	2	2	7.733	0	0	1.9959	2	2	10.2726	2
FOTG_00644	EXM36518	sister chromatid cohesion protein pds5	C:condensed nuclear chromosome; C:cytosol; F:binding; P:double-strand break repair; P:mitotic sister chromatid cohesion; P:mitotic chromosome condensation; P:synapsis	2	2	7.733	0	0	1.9959	2	2	10.2726	2
FOTG_08808	EXM23843	ycf1-vacuolar abc transporter	C:integral component of membrane; F:ATP binding; F:ATPase activity, coupled to transmembrane movement of substances; P:transmembrane transport	2	2	7.733	0	0	1.9959	2	2	10.2726	2
FOTG_04263	EXM30189	dna-directed rna polymerase ii subunit rpb1	C:DNA-directed RNA polymerase II, core complex; C:cytosol; F:DNA binding; F:DNA-directed 5'-3' RNA polymerase activity; P:transcription, RNA-templated; P:transcription from RNA polymerase II promoter; P:translesion synthesis; C:nucleolus; P:purine nucleobase metabolic process; P:pyrimidine nucleobase metabolic process	2	3	10.1148	2	2	5.1911	0	0	3.9485	2
FOTG_03194	EXM33095	oxidoreductase	F:oxidoreductase activity; P:oxidation-reduction process	3	3	10.1148	2	2	5.1911	0	0	3.9485	2
FOTG_05993	EXM27523	probable tgl5 triacylglycerol lipase involved in tag mobilization	F:triglyceride lipase activity; P:lipid catabolic process; P:glycerolipid metabolic process	3	3	10.1148	2	2	5.1911	0	0	3.9485	2
FOTG_08435	EXM24427	related to -like family protein	-	3	3	10.1148	2	2	5.1911	0	0	3.9485	2
FOTG_07539	EXM25793	t-complex protein 1 subunit zeta	C:nucleus; C:chaperonin-containing T-complex; F:ATP binding; F:unfolded protein binding; P:protein folding	2	3	10.1148	2	2	5.1911	0	0	3.9485	2
FOTG_03501	EXM31817	uncharacterized protein FFUJ_04457	C:integral component of membrane	3	3	10.1148	2	2	5.1911	0	0	3.9485	2
FOTG_18861	EXM12650	uncharacterized protein FMAN_11435	C:membrane	2	3	10.1148	2	2	5.1911	0	0	3.9485	2
FOTG_10014	EXM22409	dna polymerase iv	C:nucleus; F:DNA binding; F:DNA-directed DNA polymerase activity; P:DNA repair; P:DNA biosynthetic process; P:DNA replication; C:DNA polymerase complex	3	3	10.1148	2	2	5.1911	0	0	3.9485	2
FOTG_00364	EXM36059	vacuolar protein sorting-associated protein 1	C:fungal-type vacuole membrane; C:mitochondrial outer membrane; C:peroxisome; C:actin cortical patch; F:GTPase activity; F:GTP binding; P:protein targeting to vacuole; P:endocytosis; P:peroxisome fission; P:actin cytoskeleton organization; P:protein retention in Golgi apparatus; P:lipid tube assembly	2	2	7.733	3	3	6.7894	0	0	3.9485	2
FOTG_13242	EXM18713	peroxisomal multifunctional beta-oxidation protein	F:oxidoreductase activity; P:oxidation-reduction process	2	2	7.733	2	3	6.7894	0	0	3.9485	2
FOTG_15287	EXM16408	---NA---	F:catalytic activity; P:nucleoside metabolic process	2	2	7.733	3	3	6.7894	0	0	3.9485	2
FOTG_07850	EXM25416	atp-dependent rna helicase dbp10	C:nucleolus; C:preribosome, large subunit precursor; F:RNA binding; F:ATP-dependent RNA helicase activity; F:ATP binding; P:ribosomal large subunit assembly; P:maturation of LSU-rRNA from tricistronic rRNA transcript (SSU-rRNA, 5.8S rRNA, LSU-rRNA); P:maturation of 5.8S rRNA from tricistronic rRNA transcript (SSU-rRNA, 5.8S rRNA, LSU-rRNA); P:assembly of large subunit precursor of preribosome	2	2	7.733	3	3	6.7894	0	0	3.9485	2
FOTG_01938	EXM35505	uncharacterized protein FPRO_09272	C:nucleus; F:RNA polymerase II transcription factor activity, sequence-specific DNA binding; F:zinc ion binding; P:regulation of transcription, DNA-templated	2	2	7.733	3	3	6.7894	0	0	3.9485	2
FOTG_13492	EXM18390	uncharacterized protein LW93_3666	C:integral component of membrane; F:transferase activity, transferring glycosyl groups	2	2	7.733	3	3	6.7894	0	0	3.9485	2
FOTG_05759	EXM28496	pwwp domain-containing protein 3	-	2	2	7.733	3	3	6.7894	0	0	3.9485	2
FOTG_11866	EXM20279	3-hydroxyphenylacetate 6-hydroxylase	C:integral component of membrane; F:monooxygenase activity; F:iron ion binding; F:oxidoreductase activity, acting on paired donors, with incorporation or reduction of molecular oxygen; F:heme binding; P:oxidation-reduction process	2	2	7.733	3	3	6.7894	0	0	3.9485	2
FOTG_01804	EXM35323	Uncharacterized protein LW93_1106	-	2	2	7.733	2	3	6.7894	0	0	3.9485	2
FOTG_04296	EXM30239	peptidyl-prolyl isomerase cwc27	C:spliceosomal complex; C:cytoplasm; F:peptidyl-prolyl cis-trans isomerase activity; P:protein peptidyl-prolyl isomerization; P:mRNA processing; P:protein folding; P:RNA splicing	2	2	7.733	2	3	6.7894	0	0	3.9485	2
FOTG_17227	EXM14377	uncharacterized protein FPRN_13223	-	0	0	2.9728	2	2	5.1911	2	2	10.2726	2
FOTG_19023	EXM12475	---NA---	-	0	0	2.9728	2	2	5.1911	2	2	10.2726	2
FOTG_01703	EXM35179	---NA---	-	0	0	2.9728	2	2	5.1911	2	2	10.2726	2
FOTG_14910	EXM16870	ribonuclease h-like partial	F:nucleic acid binding; F:protein dimerization activity	0	0	2.9728	2	2	5.1911	2	2	10.2726	2
FOTG_11202	EXM20814	related to sulfatase	C:integral component of membrane; F:sulfuric ester hydrolase activity; P:metabolic process	0	0	2.9728	2	2	5.1911	2	2	10.2726	2
FOTG_01423	EXM34671	---NA---	F:metal ion binding	0	0	2.9728	2	2	5.1911	2	2	10.2726	2
FOTG_05502	EXM29358	related to vtc2- polyphosphate synthetase	C:integral component of membrane	2	2	7.733	2	2	5.1911	0	0	3.9485	2
FOTG_13325	EXM18625	vegetative incompatibility protein het-e-1	F:protein binding	2	2	7.733	2	2	5.1911	0	0	3.9485	2
FOTG_09883	EXM22712	acetyltransferase	C:mitochondrion; C:cytosolic ribosome; C:NatA complex; F:peptide alpha-N-acetyltransferase activity; F:protein binding; F:acetyltransferase activator activity; P:positive regulation of catalytic activity; P:positive regulation of N-terminal peptidyl-serine acetylation; P:acyl-carrier-protein biosynthetic process	2	2	7.733	2	2	5.1911	0	0	3.9485	2
FOTG_18293	EXM13252	tetratricopeptide-like helical domain	F:protein binding; F:ADP binding	2	2	7.733	2	2	5.1911	0	0	3.9485	2
FOTG_01938	EXM35507	---NA---	-	2	2	7.733	2	2	5.1911	0	0	3.9485	2
FOTG_12366	EXM19736	uncharacterized protein FMAN_07111	-	2	2	7.733	2	2	5.1911	0	0	3.9485	2
FOTG_00584	EXM36416	related to pet127	C:mitochondrion; P:mitochondrial RNA metabolic process	2	2	7.733	2	2	5.1911	0	0	3.9485	2
FOTG_18879	EXM12630	transcriptional regulator prz1	F:nucleic acid binding	2	2	7.733	2	2	5.1911	0	0	3.9485	2
FOTG_12565	EXM19307	beta-c chain unit d	F:oxidoreductase activity; F:metal ion binding; P:oxidation-reduction process	2	2	7.733	2	2	5.1911	0	0	3.9485	2
FOTG_00863	EXM36973	structural maintenance-chromosome 3 (chondroitin sulfate proteoglycan 6)	C:nucleus; F:chromatin binding; F:protein binding; F:ATP binding; P:DNA repair; P:mitotic sister chromatid cohesion; C:chromatin	2	2	7.733	2	2	5.1911	0	0	3.9485	2
FOTG_09001	EXM23533	d-serine dehydratase	C:integral component of membrane	2	2	7.733	2	2	5.1911	0	0	3.9485	2
FOTG_11632	EXM20507	uncharacterized protein FFUJ_11081	-	2	2	7.733	2	2	5.1911	0	0	3.9485	2
FOTG_02664	EXM34258	related to heterokaryon incompatibility protein het-6	-	2	2	7.733	2	2	5.1911	0	0	3.9485	2
FOTG_12871	EXM19084	uncharacterized protein LW93_4303	F:protein binding	2	2	7.733	2	2	5.1911	0	0	3.9485	2
FOTG_13701	EXM18120	conidial pigment biosynthesis oxidase arb2 brown2	C:integral component of membrane; F:iron ion binding; F:copper ion binding; F:oxidoreductase activity, acting on paired donors, with incorporation or reduction of molecular oxygen; F:heme binding; P:oxidation-reduction process	2	2	7.733	2	2	5.1911	0	0	3.9485	2
FOTG_04229	EXM30122	multiple rna-binding domain-containing protein 1	C:nucleolus; C:90S preribosome; F:nucleotide binding; F:rRNA primary transcript binding; P:endonucleolytic cleavage in ITS1 to separate SSU-rRNA from 5.8S rRNA and LSU-rRNA from tricistronic rRNA transcript (SSU-rRNA, 5.8S rRNA, LSU-rRNA); P:endonucleolytic cleavage to generate mature 5'-end of SSU-rRNA from (SSU-rRNA, 5.8S rRNA, LSU-rRNA); P:endonucleolytic cleavage in 5'-ETS of tricistronic rRN…	2	2	7.733	2	2	5.1911	0	0	3.9485	2
