# Supplementary material for: Extracellular Vesicles From the Cotton Pathogen Fusarium oxysporum f. sp. vasinfectum Induce a Phytotoxic Response in Plants
Source: Front Plant Sci. 2020 Jan 10;10:1610. doi: 10.3389/fpls.2019.01610 (PMC6965325; doi:10.3389/fpls.2019.01610)
Supplement: Table S2 — EV enriched GO terms. [file Table_2.xlsx]

## Sheet: EV protein enriched GO terms
Tags	GO ID	GO Name	GO Category	FDR	P-Value	Nr Test	Nr Reference	Non Annot Test	Non Annot Reference
[OVER]	GO:0005524	ATP binding	MOLECULAR_FUNCTION	6.67299e-09	2.04996e-11	63	1248	418	23487
[OVER]	GO:0005840	ribosome	CELLULAR_COMPONENT	1.69524e-06	9.56881e-09	29	413	452	24322
[OVER]	GO:0003746	translation elongation factor activity	MOLECULAR_FUNCTION	5.3439e-05	3.92831e-07	8	29	473	24706
[OVER]	GO:0005788	endoplasmic reticulum lumen	CELLULAR_COMPONENT	0.000213171	1.90281e-06	4	2	477	24733
[OVER]	GO:0006448	regulation of translational elongation	BIOLOGICAL_PROCESS	0.000241675	2.28414e-06	8	38	473	24697
[OVER]	GO:0005525	GTP binding	MOLECULAR_FUNCTION	0.000300258	3.08321e-06	16	194	465	24541
[OVER]	GO:0006457	protein folding	BIOLOGICAL_PROCESS	0.000471715	5.97889e-06	13	136	468	24599
[OVER]	GO:0004805	trehalose-phosphatase activity	MOLECULAR_FUNCTION	0.000536241	6.89834e-06	3	0	478	24735
[OVER]	GO:0006423	cysteinyl-tRNA aminoacylation	BIOLOGICAL_PROCESS	0.00177109	2.7201e-05	3	1	478	24734
[OVER]	GO:0004817	cysteine-tRNA ligase activity	MOLECULAR_FUNCTION	0.00177109	2.7201e-05	3	1	478	24734
[OVER]	GO:0042254	ribosome biogenesis	BIOLOGICAL_PROCESS	0.00267483	4.35389e-05	21	387	460	24348
[OVER]	GO:0006886	intracellular protein transport	BIOLOGICAL_PROCESS	0.0030986	5.20636e-05	20	362	461	24373
[OVER]	GO:0018279	protein N-linked glycosylation via asparagine	BIOLOGICAL_PROCESS	0.00372762	6.70366e-05	3	2	478	24733
[OVER]	GO:0015936	coenzyme A metabolic process	BIOLOGICAL_PROCESS	0.00428413	8.15435e-05	4	9	477	24726
[OVER]	GO:0051082	unfolded protein binding	MOLECULAR_FUNCTION	0.00508738	0.000100172	8	68	473	24667
[OVER]	GO:0003924	GTPase activity	MOLECULAR_FUNCTION	0.00607356	0.000125171	11	136	470	24599
[OVER]	GO:0016192	vesicle-mediated transport	BIOLOGICAL_PROCESS	0.00877769	0.000187814	18	338	463	24397
[OVER]	GO:0006026	aminoglycan catabolic process	BIOLOGICAL_PROCESS	0.00919752	0.000202439	6	39	475	24696
[OVER]	GO:0019843	rRNA binding	MOLECULAR_FUNCTION	0.00919752	0.000201208	5	24	476	24711
[OVER]	GO:0003735	structural constituent of ribosome	MOLECULAR_FUNCTION	0.00933388	0.000207066	12	170	469	24565
[OVER]	GO:0005982	starch metabolic process	BIOLOGICAL_PROCESS	0.00955293	0.000213179	9	98	472	24637
[OVER]	GO:0046034	ATP metabolic process	BIOLOGICAL_PROCESS	0.00970513	0.000217849	12	171	469	24564
[OVER]	GO:0009051	pentose-phosphate shunt, oxidative branch	BIOLOGICAL_PROCESS	0.0100301	0.000228018	3	4	478	24731
[OVER]	GO:0004180	carboxypeptidase activity	MOLECULAR_FUNCTION	0.0100301	0.000229093	6	40	475	24695
[OVER]	GO:0019829	ATPase-coupled cation transmembrane transporter activity	MOLECULAR_FUNCTION	0.012197	0.000284993	7	60	474	24675
[OVER]	GO:0005985	sucrose metabolic process	BIOLOGICAL_PROCESS	0.0125778	0.000300493	9	103	472	24632
[OVER]	GO:0022618	ribonucleoprotein complex assembly	BIOLOGICAL_PROCESS	0.0133749	0.000326431	10	128	471	24607
[OVER]	GO:0009272	fungal-type cell wall biogenesis	BIOLOGICAL_PROCESS	0.0133749	0.000325512	5	27	476	24708
[OVER]	GO:0015629	actin cytoskeleton	CELLULAR_COMPONENT	0.0133749	0.00032656	8	82	473	24653
[OVER]	GO:0005980	glycogen catabolic process	BIOLOGICAL_PROCESS	0.0136943	0.000363121	2	0	479	24735
[OVER]	GO:0006556	S-adenosylmethionine biosynthetic process	BIOLOGICAL_PROCESS	0.0136943	0.000363121	2	0	479	24735
[OVER]	GO:0004478	methionine adenosyltransferase activity	MOLECULAR_FUNCTION	0.0136943	0.000363121	2	0	479	24735
[OVER]	GO:0004360	glutamine-fructose-6-phosphate transaminase (isomerizing) activity	MOLECULAR_FUNCTION	0.0136943	0.000363121	2	0	479	24735
[OVER]	GO:0004135	amylo-alpha-1,6-glucosidase activity	MOLECULAR_FUNCTION	0.0136943	0.000363121	2	0	479	24735
[OVER]	GO:0004134	4-alpha-glucanotransferase activity	MOLECULAR_FUNCTION	0.0136943	0.000363121	2	0	479	24735
[OVER]	GO:0005946	alpha,alpha-trehalose-phosphate synthase complex (UDP-forming)	CELLULAR_COMPONENT	0.0136943	0.000359661	3	5	478	24730
[OVER]	GO:0030126	COPI vesicle coat	CELLULAR_COMPONENT	0.0136943	0.000359661	3	5	478	24730
[OVER]	GO:0008250	oligosaccharyltransferase complex	CELLULAR_COMPONENT	0.0136943	0.000359661	3	5	478	24730
[OVER]	GO:0009678	pyrophosphate hydrolysis-driven proton transmembrane transporter activity	MOLECULAR_FUNCTION	0.0141036	0.000377676	5	28	476	24707
[OVER]	GO:0006006	glucose metabolic process	BIOLOGICAL_PROCESS	0.0177811	0.000500365	9	111	472	24624
[OVER]	GO:0022627	cytosolic small ribosomal subunit	CELLULAR_COMPONENT	0.0177811	0.000497004	4	16	477	24719
[OVER]	GO:0016616	oxidoreductase activity, acting on the CH-OH group of donors, NAD or NADP as acceptor	MOLECULAR_FUNCTION	0.0188426	0.000534262	12	190	469	24545
[OVER]	GO:0000271	polysaccharide biosynthetic process	BIOLOGICAL_PROCESS	0.024836	0.000728066	4	18	477	24717
[OVER]	GO:0005200	structural constituent of cytoskeleton	MOLECULAR_FUNCTION	0.024836	0.000728066	4	18	477	24717
[OVER]	GO:0006090	pyruvate metabolic process	BIOLOGICAL_PROCESS	0.0252143	0.000754643	9	118	472	24617
[OVER]	GO:0071541	eukaryotic translation initiation factor 3 complex, eIF3m	CELLULAR_COMPONENT	0.0252143	0.000749053	3	7	478	24728
[OVER]	GO:0071540	eukaryotic translation initiation factor 3 complex, eIF3e	CELLULAR_COMPONENT	0.0252143	0.000749053	3	7	478	24728
[OVER]	GO:0006730	one-carbon metabolic process	BIOLOGICAL_PROCESS	0.0286303	0.000868153	4	19	477	24716
[OVER]	GO:0008610	lipid biosynthetic process	BIOLOGICAL_PROCESS	0.0290594	0.00088498	14	261	467	24474
[OVER]	GO:0048284	organelle fusion	BIOLOGICAL_PROCESS	0.0317629	0.000975654	7	75	474	24660
[OVER]	GO:0006979	response to oxidative stress	BIOLOGICAL_PROCESS	0.0322234	0.000994028	9	123	472	24612
[OVER]	GO:0042744	hydrogen peroxide catabolic process	BIOLOGICAL_PROCESS	0.0325013	0.0010154	3	8	478	24727
[OVER]	GO:0031297	replication fork processing	BIOLOGICAL_PROCESS	0.0325013	0.0010154	3	8	478	24727
[OVER]	GO:0043022	ribosome binding	MOLECULAR_FUNCTION	0.0327097	0.0010262	4	20	477	24715
[OVER]	GO:0030328	prenylcysteine catabolic process	BIOLOGICAL_PROCESS	0.0333076	0.00107557	2	1	479	24734
[OVER]	GO:0001735	prenylcysteine oxidase activity	MOLECULAR_FUNCTION	0.0333076	0.00107557	2	1	479	24734
[OVER]	GO:0004573	mannosyl-oligosaccharide glucosidase activity	MOLECULAR_FUNCTION	0.0333076	0.00107557	2	1	479	24734
[OVER]	GO:0030897	HOPS complex	CELLULAR_COMPONENT	0.0333076	0.00107557	2	1	479	24734
[OVER]	GO:0017177	glucosidase II complex	CELLULAR_COMPONENT	0.0333076	0.00107557	2	1	479	24734
[OVER]	GO:0005835	fatty acid synthase complex	CELLULAR_COMPONENT	0.0333076	0.00107557	2	1	479	24734
[OVER]	GO:0016072	rRNA metabolic process	BIOLOGICAL_PROCESS	0.0342459	0.00111036	11	179	470	24556
[OVER]	GO:0009152	purine ribonucleotide biosynthetic process	BIOLOGICAL_PROCESS	0.0344246	0.00112519	7	77	474	24658
[OVER]	GO:0000413	protein peptidyl-prolyl isomerization	BIOLOGICAL_PROCESS	0.0358109	0.00120341	4	21	477	24714
[OVER]	GO:0003755	peptidyl-prolyl cis-trans isomerase activity	MOLECULAR_FUNCTION	0.0358109	0.00120341	4	21	477	24714
[OVER]	GO:0016887	ATPase activity	MOLECULAR_FUNCTION	0.0378322	0.00128623	14	272	467	24463
[OVER]	GO:0046939	nucleotide phosphorylation	BIOLOGICAL_PROCESS	0.0378598	0.00129214	7	79	474	24656
[OVER]	GO:0043130	ubiquitin binding	MOLECULAR_FUNCTION	0.0380957	0.0013102	5	38	476	24697
[OVER]	GO:0005992	trehalose biosynthetic process	BIOLOGICAL_PROCESS	0.0382264	0.00133476	3	9	478	24726
[OVER]	GO:0006986	response to unfolded protein	BIOLOGICAL_PROCESS	0.0382264	0.00133476	3	9	478	24726
[OVER]	GO:0034976	response to endoplasmic reticulum stress	BIOLOGICAL_PROCESS	0.0412042	0.00145531	5	39	476	24696
[UNDER]	GO:0003700	DNA-binding transcription factor activity	MOLECULAR_FUNCTION	0.0412042	0.00146038	10	1264	471	23471
[OVER]	GO:0010035	response to inorganic substance	BIOLOGICAL_PROCESS	0.0451457	0.00161192	5	40	476	24695
[OVER]	GO:0007064	mitotic sister chromatid cohesion	BIOLOGICAL_PROCESS	0.0452078	0.00162007	4	23	477	24712
[OVER]	GO:0016744	transferase activity, transferring aldehyde or ketonic groups	MOLECULAR_FUNCTION	0.0470481	0.00171073	3	10	478	24725
[OVER]	GO:0006040	amino sugar metabolic process	BIOLOGICAL_PROCESS	0.0477741	0.0017434	8	108	473	24627
[OVER]	GO:0015976	carbon utilization	BIOLOGICAL_PROCESS	0.0484439	0.00178056	5	41	476	24694
[OVER]	GO:0016126	sterol biosynthetic process	BIOLOGICAL_PROCESS	0.0484439	0.00178056	5	41	476	24694
[OVER]	GO:0050661	NADP binding	MOLECULAR_FUNCTION	0.0499062	0.00184086	8	109	473	24626
