# Supplementary material for: Extracellular Vesicles From the Cotton Pathogen Fusarium oxysporum f. sp. vasinfectum Induce a Phytotoxic Response in Plants
Source: Front Plant Sci. 2020 Jan 10;10:1610. doi: 10.3389/fpls.2019.01610 (PMC6965325; doi:10.3389/fpls.2019.01610)
Supplement: Table S3 — WCL enriched GO terms. [file Table_3.xlsx]

## Sheet: WCL protein enriched GO terms
Tags	GO ID	GO Name	GO Category	FDR	P-Value	Nr Test	Nr Reference	Non Annot Test	Non Annot Reference
[OVER]	GO:0003735	structural constituent of ribosome	MOLECULAR_FUNCTION	6.8288e-66	8.12315e-68	113	69	2338	22696
[OVER]	GO:0005524	ATP binding	MOLECULAR_FUNCTION	1.92334e-59	2.7153e-61	327	984	2124	21781
[UNDER]	GO:0000981	DNA-binding transcription factor activity, RNA polymerase II-specific	MOLECULAR_FUNCTION	1.07522e-46	1.99583e-48	1	1099	2450	21666
[OVER]	GO:0006094	gluconeogenesis	BIOLOGICAL_PROCESS	3.79667e-38	8.33777e-40	66	41	2385	22724
[OVER]	GO:0001731	formation of translation preinitiation complex	BIOLOGICAL_PROCESS	8.14821e-33	1.98113e-34	38	4	2413	22761
[OVER]	GO:0003743	translation initiation factor activity	MOLECULAR_FUNCTION	6.32151e-31	1.61963e-32	64	59	2387	22706
[OVER]	GO:0034515	proteasome storage granule	CELLULAR_COMPONENT	5.94092e-30	1.57648e-31	33	2	2418	22763
[OVER]	GO:0005982	starch metabolic process	BIOLOGICAL_PROCESS	2.67564e-29	7.27495e-31	58	49	2393	22716
[OVER]	GO:0016282	eukaryotic 43S preinitiation complex	CELLULAR_COMPONENT	3.69074e-29	1.01314e-30	31	1	2420	22764
[OVER]	GO:0005985	sucrose metabolic process	BIOLOGICAL_PROCESS	6.45624e-29	1.8145e-30	59	53	2392	22712
[OVER]	GO:0030479	actin cortical patch	CELLULAR_COMPONENT	2.9226e-28	8.59587e-30	41	15	2410	22750
[OVER]	GO:0033290	eukaryotic 48S preinitiation complex	CELLULAR_COMPONENT	3.42613e-28	1.02112e-29	30	1	2421	22764
[OVER]	GO:0006531	aspartate metabolic process	BIOLOGICAL_PROCESS	5.38487e-28	1.61898e-29	45	23	2406	22742
[OVER]	GO:0043614	multi-eIF complex	CELLULAR_COMPONENT	1.28904e-27	3.9261e-29	28	0	2423	22765
[OVER]	GO:0006013	mannose metabolic process	BIOLOGICAL_PROCESS	1.37944e-27	4.21946e-29	45	24	2406	22741
[OVER]	GO:0006000	fructose metabolic process	BIOLOGICAL_PROCESS	2.23995e-26	7.20297e-28	44	25	2407	22740
[OVER]	GO:0042645	mitochondrial nucleoid	CELLULAR_COMPONENT	4.52389e-26	1.47839e-27	30	3	2421	22762
[OVER]	GO:0006012	galactose metabolic process	BIOLOGICAL_PROCESS	1.56685e-25	5.2433e-27	42	23	2409	22742
[OVER]	GO:0019643	reductive tricarboxylic acid cycle	BIOLOGICAL_PROCESS	2.12768e-25	7.23133e-27	34	9	2417	22756
[OVER]	GO:0006522	alanine metabolic process	BIOLOGICAL_PROCESS	2.45433e-24	8.69441e-26	41	24	2410	22741
[OVER]	GO:0005525	GTP binding	MOLECULAR_FUNCTION	1.612e-22	6.32157e-24	74	136	2377	22629
[UNDER]	GO:0008270	zinc ion binding	MOLECULAR_FUNCTION	3.81655e-22	1.52662e-23	69	1772	2382	20993
[OVER]	GO:0010494	cytoplasmic stress granule	CELLULAR_COMPONENT	6.00573e-21	2.55931e-22	29	9	2422	22756
[OVER]	GO:0008536	Ran GTPase binding	MOLECULAR_FUNCTION	1.02022e-20	4.42763e-22	26	5	2425	22760
[OVER]	GO:0009097	isoleucine biosynthetic process	BIOLOGICAL_PROCESS	3.52199e-20	1.58375e-21	32	16	2419	22749
[OVER]	GO:0005885	Arp2/3 protein complex	CELLULAR_COMPONENT	1.15137e-19	5.28274e-21	20	0	2431	22765
[OVER]	GO:0010499	proteasomal ubiquitin-independent protein catabolic process	BIOLOGICAL_PROCESS	2.16949e-19	1.0181e-20	21	1	2430	22764
[OVER]	GO:0051287	NAD binding	MOLECULAR_FUNCTION	4.13163e-19	1.9605e-20	45	53	2406	22712
[OVER]	GO:0046961	proton-transporting ATPase activity, rotational mechanism	MOLECULAR_FUNCTION	6.90458e-19	3.33947e-20	24	5	2427	22760
[OVER]	GO:0004298	threonine-type endopeptidase activity	MOLECULAR_FUNCTION	2.01224e-18	1.00744e-19	20	1	2431	22764
[OVER]	GO:0003924	GTPase activity	MOLECULAR_FUNCTION	3.09823e-18	1.57544e-19	55	92	2396	22673
[OVER]	GO:0051082	unfolded protein binding	MOLECULAR_FUNCTION	8.45121e-18	4.3637e-19	38	38	2413	22727
[OVER]	GO:0009099	valine biosynthetic process	BIOLOGICAL_PROCESS	2.55966e-17	1.38523e-18	27	13	2424	22752
[OVER]	GO:0009098	leucine biosynthetic process	BIOLOGICAL_PROCESS	2.55966e-17	1.38523e-18	27	13	2424	22752
[OVER]	GO:0019872	streptomycin biosynthetic process	BIOLOGICAL_PROCESS	2.55966e-17	1.38523e-18	27	13	2424	22752
[OVER]	GO:0000287	magnesium ion binding	MOLECULAR_FUNCTION	4.077e-17	2.22769e-18	45	63	2406	22702
[OVER]	GO:0042802	identical protein binding	MOLECULAR_FUNCTION	2.00419e-16	1.15274e-17	39	47	2412	22718
[OVER]	GO:0006108	malate metabolic process	BIOLOGICAL_PROCESS	1.50464e-15	8.89013e-17	18	2	2433	22763
[OVER]	GO:0015976	carbon utilization	BIOLOGICAL_PROCESS	4.41867e-15	2.66853e-16	27	19	2424	22746
[OVER]	GO:0004396	hexokinase activity	MOLECULAR_FUNCTION	6.82939e-15	4.1512e-16	22	9	2429	22756
[OVER]	GO:0046835	carbohydrate phosphorylation	BIOLOGICAL_PROCESS	9.2421e-15	5.69023e-16	27	20	2424	22745
[OVER]	GO:0022625	cytosolic large ribosomal subunit	CELLULAR_COMPONENT	4.39333e-14	2.82552e-15	18	4	2433	22761
[OVER]	GO:0005536	glucose binding	MOLECULAR_FUNCTION	5.05646e-14	3.28504e-15	22	11	2429	22754
[OVER]	GO:0022627	cytosolic small ribosomal subunit	CELLULAR_COMPONENT	7.60697e-14	5.02159e-15	17	3	2434	22762
[OVER]	GO:0045454	cell redox homeostasis	BIOLOGICAL_PROCESS	1.57903e-13	1.08365e-14	28	27	2423	22738
[OVER]	GO:0005832	chaperonin-containing T-complex	CELLULAR_COMPONENT	1.22438e-12	8.86677e-14	14	1	2437	22764
[OVER]	GO:0000147	actin cortical patch assembly	BIOLOGICAL_PROCESS	1.32075e-12	9.58188e-14	17	5	2434	22760
[OVER]	GO:0051666	actin cortical patch localization	BIOLOGICAL_PROCESS	2.15949e-12	1.59209e-13	19	9	2432	22756
[OVER]	GO:0001678	cellular glucose homeostasis	BIOLOGICAL_PROCESS	2.26381e-12	1.67789e-13	23	18	2428	22747
[OVER]	GO:0000002	mitochondrial genome maintenance	BIOLOGICAL_PROCESS	3.10481e-12	2.32962e-13	22	16	2429	22749
[OVER]	GO:0043130	ubiquitin binding	MOLECULAR_FUNCTION	8.49398e-12	6.57312e-13	23	20	2428	22745
[OVER]	GO:0030060	L-malate dehydrogenase activity	MOLECULAR_FUNCTION	1.0931e-11	8.55903e-13	13	1	2438	22764
[OVER]	GO:0080025	phosphatidylinositol-3,5-bisphosphate binding	MOLECULAR_FUNCTION	1.0931e-11	8.55903e-13	13	1	2438	22764
[OVER]	GO:0051083	'de novo' cotranslational protein folding	BIOLOGICAL_PROCESS	3.1317e-11	2.55858e-12	16	6	2435	22759
[OVER]	GO:0000162	tryptophan biosynthetic process	BIOLOGICAL_PROCESS	3.18433e-11	2.63072e-12	25	28	2426	22737
[OVER]	GO:0009094	L-phenylalanine biosynthetic process	BIOLOGICAL_PROCESS	3.18433e-11	2.63072e-12	25	28	2426	22737
[OVER]	GO:0006571	tyrosine biosynthetic process	BIOLOGICAL_PROCESS	3.18433e-11	2.63072e-12	25	28	2426	22737
[OVER]	GO:0051285	cell cortex of cell tip	CELLULAR_COMPONENT	3.44306e-11	2.85346e-12	18	10	2433	22755
[OVER]	GO:0005934	cellular bud tip	CELLULAR_COMPONENT	5.30502e-11	4.47286e-12	24	26	2427	22739
[OVER]	GO:0005782	peroxisomal matrix	CELLULAR_COMPONENT	6.85559e-11	5.84293e-12	13	2	2438	22763
[OVER]	GO:0006104	succinyl-CoA metabolic process	BIOLOGICAL_PROCESS	8.33608e-11	7.17012e-12	11	0	2440	22765
[OVER]	GO:0003961	O-acetylhomoserine aminocarboxypropyltransferase activity	MOLECULAR_FUNCTION	8.33608e-11	7.17012e-12	11	0	2440	22765
[OVER]	GO:0005952	cAMP-dependent protein kinase complex	CELLULAR_COMPONENT	8.33608e-11	7.17012e-12	11	0	2440	22765
[OVER]	GO:0008540	proteasome regulatory particle, base subcomplex	CELLULAR_COMPONENT	9.48164e-11	8.21742e-12	12	1	2439	22764
[OVER]	GO:0005758	mitochondrial intermembrane space	CELLULAR_COMPONENT	1.46566e-10	1.29323e-11	24	28	2427	22737
[OVER]	GO:0030170	pyridoxal phosphate binding	MOLECULAR_FUNCTION	3.14641e-10	2.86673e-11	41	96	2410	22669
[OVER]	GO:0051087	chaperone binding	MOLECULAR_FUNCTION	5.14759e-10	4.71021e-11	14	5	2437	22760
[OVER]	GO:0031369	translation initiation factor binding	MOLECULAR_FUNCTION	5.72272e-10	5.2664e-11	16	9	2435	22756
[OVER]	GO:0006554	lysine catabolic process	BIOLOGICAL_PROCESS	6.35139e-10	5.85324e-11	20	19	2431	22746
[OVER]	GO:0002184	cytoplasmic translational termination	BIOLOGICAL_PROCESS	7.95507e-10	7.40393e-11	10	0	2441	22765
[OVER]	GO:0019773	proteasome core complex, alpha-subunit complex	CELLULAR_COMPONENT	7.95507e-10	7.40393e-11	10	0	2441	22765
[OVER]	GO:0071541	eukaryotic translation initiation factor 3 complex, eIF3m	CELLULAR_COMPONENT	7.95507e-10	7.40393e-11	10	0	2441	22765
[OVER]	GO:0071540	eukaryotic translation initiation factor 3 complex, eIF3e	CELLULAR_COMPONENT	7.95507e-10	7.40393e-11	10	0	2441	22765
[OVER]	GO:0018444	translation release factor complex	CELLULAR_COMPONENT	1.50749e-09	1.42866e-10	14	6	2437	22759
[OVER]	GO:0003746	translation elongation factor activity	MOLECULAR_FUNCTION	1.8063e-09	1.71893e-10	19	18	2432	22747
[OVER]	GO:0000011	vacuole inheritance	BIOLOGICAL_PROCESS	2.46954e-09	2.38561e-10	12	3	2439	22762
[OVER]	GO:0046487	glyoxylate metabolic process	BIOLOGICAL_PROCESS	2.9909e-09	2.92444e-10	22	28	2429	22737
[OVER]	GO:0061418	regulation of transcription from RNA polymerase II promoter in response to hypoxia	BIOLOGICAL_PROCESS	7.31733e-09	7.64254e-10	9	0	2442	22765
[OVER]	GO:0006646	phosphatidylethanolamine biosynthetic process	BIOLOGICAL_PROCESS	7.31733e-09	7.42731e-10	10	1	2441	22764
[OVER]	GO:0045762	positive regulation of adenylate cyclase activity	BIOLOGICAL_PROCESS	7.31733e-09	7.64254e-10	9	0	2442	22765
[OVER]	GO:0035955	negative regulation of dipeptide transport by negative regulation of transcription from RNA polymerase II promoter	BIOLOGICAL_PROCESS	7.31733e-09	7.64254e-10	9	0	2442	22765
[OVER]	GO:2000531	regulation of fatty acid biosynthetic process by regulation of transcription from RNA polymerase II promoter	BIOLOGICAL_PROCESS	7.31733e-09	7.64254e-10	9	0	2442	22765
[OVER]	GO:0002188	translation reinitiation	BIOLOGICAL_PROCESS	7.31733e-09	7.64254e-10	9	0	2442	22765
[OVER]	GO:0097271	protein localization to bud neck	BIOLOGICAL_PROCESS	7.31733e-09	7.64254e-10	9	0	2442	22765
[OVER]	GO:0036033	mediator complex binding	MOLECULAR_FUNCTION	7.31733e-09	7.64254e-10	9	0	2442	22765
[OVER]	GO:0004862	cAMP-dependent protein kinase inhibitor activity	MOLECULAR_FUNCTION	7.31733e-09	7.64254e-10	9	0	2442	22765
[OVER]	GO:0042826	histone deacetylase binding	MOLECULAR_FUNCTION	7.31733e-09	7.64254e-10	9	0	2442	22765
[OVER]	GO:0008603	cAMP-dependent protein kinase regulator activity	MOLECULAR_FUNCTION	7.31733e-09	7.64254e-10	9	0	2442	22765
[OVER]	GO:0030552	cAMP binding	MOLECULAR_FUNCTION	7.31733e-09	7.64254e-10	9	0	2442	22765
[OVER]	GO:0008541	proteasome regulatory particle, lid subcomplex	CELLULAR_COMPONENT	7.31733e-09	7.42731e-10	10	1	2441	22764
[OVER]	GO:0019774	proteasome core complex, beta-subunit complex	CELLULAR_COMPONENT	7.31733e-09	7.42731e-10	10	1	2441	22764
[OVER]	GO:0005509	calcium ion binding	MOLECULAR_FUNCTION	1.27791e-08	1.35643e-09	29	58	2422	22707
[OVER]	GO:0006541	glutamine metabolic process	BIOLOGICAL_PROCESS	1.52325e-08	1.62281e-09	19	22	2432	22743
[OVER]	GO:0016973	poly(A)+ mRNA export from nucleus	BIOLOGICAL_PROCESS	1.8496e-08	1.97532e-09	11	3	2440	22762
[OVER]	GO:0043486	histone exchange	BIOLOGICAL_PROCESS	2.58514e-08	2.80817e-09	18	20	2433	22745
[OVER]	GO:0016149	translation release factor activity, codon specific	MOLECULAR_FUNCTION	3.69707e-08	4.06436e-09	10	2	2441	22763
[OVER]	GO:1990023	mitotic spindle midzone	CELLULAR_COMPONENT	3.69707e-08	4.06436e-09	10	2	2441	22763
[OVER]	GO:0006606	protein import into nucleus	BIOLOGICAL_PROCESS	3.97002e-08	4.38216e-09	16	15	2435	22750
[OVER]	GO:0051539	4 iron, 4 sulfur cluster binding	MOLECULAR_FUNCTION	3.97002e-08	4.38216e-09	16	15	2435	22750
[OVER]	GO:0034399	nuclear periphery	CELLULAR_COMPONENT	3.97002e-08	4.38216e-09	16	15	2435	22750
[OVER]	GO:0001198	negative regulation of mating-type specific transcription from RNA polymerase II promoter	BIOLOGICAL_PROCESS	6.19117e-08	6.97619e-09	9	1	2442	22764
[OVER]	GO:0046827	positive regulation of protein export from nucleus	BIOLOGICAL_PROCESS	6.19117e-08	6.97619e-09	9	1	2442	22764
[OVER]	GO:0006529	asparagine biosynthetic process	BIOLOGICAL_PROCESS	6.19117e-08	6.97619e-09	9	1	2442	22764
[OVER]	GO:0006177	GMP biosynthetic process	BIOLOGICAL_PROCESS	6.86318e-08	7.88593e-09	8	0	2443	22765
[OVER]	GO:0045041	protein import into mitochondrial intermembrane space	BIOLOGICAL_PROCESS	6.86318e-08	7.88593e-09	8	0	2443	22765
[OVER]	GO:0051455	attachment of spindle microtubules to kinetochore involved in homologous chromosome segregation	BIOLOGICAL_PROCESS	6.86318e-08	7.88593e-09	8	0	2443	22765
[OVER]	GO:0003983	UTP:glucose-1-phosphate uridylyltransferase activity	MOLECULAR_FUNCTION	6.86318e-08	7.88593e-09	8	0	2443	22765
[OVER]	GO:0008139	nuclear localization sequence binding	MOLECULAR_FUNCTION	6.86318e-08	7.88593e-09	8	0	2443	22765
[OVER]	GO:0004775	succinate-CoA ligase (ADP-forming) activity	MOLECULAR_FUNCTION	6.86318e-08	7.88593e-09	8	0	2443	22765
[OVER]	GO:0042709	succinate-CoA ligase complex	CELLULAR_COMPONENT	6.86318e-08	7.88593e-09	8	0	2443	22765
[OVER]	GO:0005850	eukaryotic translation initiation factor 2 complex	CELLULAR_COMPONENT	6.86318e-08	7.88593e-09	8	0	2443	22765
[OVER]	GO:0005967	mitochondrial pyruvate dehydrogenase complex	CELLULAR_COMPONENT	6.86318e-08	7.88593e-09	8	0	2443	22765
[OVER]	GO:0033551	monopolin complex	CELLULAR_COMPONENT	6.86318e-08	7.88593e-09	8	0	2443	22765
[OVER]	GO:0005946	alpha,alpha-trehalose-phosphate synthase complex (UDP-forming)	CELLULAR_COMPONENT	6.86318e-08	7.88593e-09	8	0	2443	22765
[OVER]	GO:0005844	polysome	CELLULAR_COMPONENT	1.23044e-07	1.43471e-08	13	9	2438	22756
[OVER]	GO:0006189	'de novo' IMP biosynthetic process	BIOLOGICAL_PROCESS	1.37307e-07	1.60641e-08	10	3	2441	22762
[OVER]	GO:0003958	NADPH-hemoprotein reductase activity	MOLECULAR_FUNCTION	1.54259e-07	1.81884e-08	12	7	2439	22758
[OVER]	GO:0042744	hydrogen peroxide catabolic process	BIOLOGICAL_PROCESS	2.88744e-07	3.50267e-08	9	2	2442	22763
[OVER]	GO:0046933	proton-transporting ATP synthase activity, rotational mechanism	MOLECULAR_FUNCTION	4.09538e-07	5.12859e-08	10	4	2441	22761
[OVER]	GO:0010181	FMN binding	MOLECULAR_FUNCTION	4.50079e-07	5.65394e-08	32	86	2419	22679
[OVER]	GO:0006890	retrograde vesicle-mediated transport, Golgi to endoplasmic reticulum	BIOLOGICAL_PROCESS	4.72769e-07	5.96986e-08	13	11	2438	22754
[OVER]	GO:0046294	formaldehyde catabolic process	BIOLOGICAL_PROCESS	5.08896e-07	6.48593e-08	8	1	2443	22764
[OVER]	GO:0006011	UDP-glucose metabolic process	BIOLOGICAL_PROCESS	5.08896e-07	6.48593e-08	8	1	2443	22764
[OVER]	GO:0004066	asparagine synthase (glutamine-hydrolyzing) activity	MOLECULAR_FUNCTION	5.08896e-07	6.48593e-08	8	1	2443	22764
[OVER]	GO:0006696	ergosterol biosynthetic process	BIOLOGICAL_PROCESS	5.51353e-07	7.10633e-08	15	17	2436	22748
[OVER]	GO:0033859	furaldehyde metabolic process	BIOLOGICAL_PROCESS	6.18544e-07	8.13406e-08	7	0	2444	22765
[OVER]	GO:0000947	amino acid catabolic process to alcohol via Ehrlich pathway	BIOLOGICAL_PROCESS	6.18544e-07	8.13406e-08	7	0	2444	22765
[OVER]	GO:0005978	glycogen biosynthetic process	BIOLOGICAL_PROCESS	6.18544e-07	8.13406e-08	7	0	2444	22765
[OVER]	GO:0006407	rRNA export from nucleus	BIOLOGICAL_PROCESS	6.18544e-07	8.13406e-08	7	0	2444	22765
[OVER]	GO:0009051	pentose-phosphate shunt, oxidative branch	BIOLOGICAL_PROCESS	6.18544e-07	8.13406e-08	7	0	2444	22765
[OVER]	GO:0006048	UDP-N-acetylglucosamine biosynthetic process	BIOLOGICAL_PROCESS	6.18544e-07	8.13406e-08	7	0	2444	22765
[OVER]	GO:0006069	ethanol oxidation	BIOLOGICAL_PROCESS	6.18544e-07	8.13406e-08	7	0	2444	22765
[OVER]	GO:0004022	alcohol dehydrogenase (NAD) activity	MOLECULAR_FUNCTION	6.18544e-07	8.13406e-08	7	0	2444	22765
[OVER]	GO:0033833	hydroxymethylfurfural reductase (NADH) activity	MOLECULAR_FUNCTION	6.18544e-07	8.13406e-08	7	0	2444	22765
[OVER]	GO:0036402	proteasome-activating ATPase activity	MOLECULAR_FUNCTION	6.18544e-07	8.13406e-08	7	0	2444	22765
[OVER]	GO:0042124	1,3-beta-glucanosyltransferase activity	MOLECULAR_FUNCTION	6.18544e-07	8.13406e-08	7	0	2444	22765
[OVER]	GO:0051903	S-(hydroxymethyl)glutathione dehydrogenase activity	MOLECULAR_FUNCTION	6.18544e-07	8.13406e-08	7	0	2444	22765
[OVER]	GO:0006749	glutathione metabolic process	BIOLOGICAL_PROCESS	8.31558e-07	1.10005e-07	18	28	2433	22737
[OVER]	GO:0045899	positive regulation of RNA polymerase II transcriptional preinitiation complex assembly	BIOLOGICAL_PROCESS	9.54675e-07	1.27914e-07	9	3	2442	22762
[OVER]	GO:0017053	transcriptional repressor complex	CELLULAR_COMPONENT	9.54675e-07	1.27914e-07	9	3	2442	22762
[OVER]	GO:0006574	valine catabolic process	BIOLOGICAL_PROCESS	1.02477e-06	1.37975e-07	17	25	2434	22740
[OVER]	GO:0006550	isoleucine catabolic process	BIOLOGICAL_PROCESS	1.02477e-06	1.37975e-07	17	25	2434	22740
[OVER]	GO:0042393	histone binding	MOLECULAR_FUNCTION	1.42696e-06	1.9306e-07	15	19	2436	22746
[OVER]	GO:0006552	leucine catabolic process	BIOLOGICAL_PROCESS	1.52659e-06	2.07536e-07	17	26	2434	22739
[OVER]	GO:0005886	plasma membrane	CELLULAR_COMPONENT	1.76082e-06	2.403e-07	44	157	2407	22608
[OVER]	GO:0019878	lysine biosynthetic process via aminoadipic acid	BIOLOGICAL_PROCESS	2.15123e-06	2.96392e-07	8	2	2443	22763
[OVER]	GO:0070682	proteasome regulatory particle assembly	BIOLOGICAL_PROCESS	2.15123e-06	2.96392e-07	8	2	2443	22763
[OVER]	GO:0030127	COPII vesicle coat	CELLULAR_COMPONENT	2.15123e-06	2.96392e-07	8	2	2443	22763
[OVER]	GO:0000433	carbon catabolite repression of transcription from RNA polymerase II promoter by glucose	BIOLOGICAL_PROCESS	2.46895e-06	3.41459e-07	10	6	2441	22759
[OVER]	GO:0016584	nucleosome positioning	BIOLOGICAL_PROCESS	2.71126e-06	3.79576e-07	9	4	2442	22761
[OVER]	GO:0061392	regulation of transcription from RNA polymerase II promoter in response to osmotic stress	BIOLOGICAL_PROCESS	2.71126e-06	3.79576e-07	9	4	2442	22761
[OVER]	GO:0032541	cortical endoplasmic reticulum	CELLULAR_COMPONENT	2.71126e-06	3.79576e-07	9	4	2442	22761
[OVER]	GO:0051131	chaperone-mediated protein complex assembly	BIOLOGICAL_PROCESS	4.18343e-06	5.95523e-07	7	1	2444	22764
[OVER]	GO:0031225	anchored component of membrane	CELLULAR_COMPONENT	4.18343e-06	5.95523e-07	7	1	2444	22764
[OVER]	GO:0030126	COPI vesicle coat	CELLULAR_COMPONENT	4.18343e-06	5.95523e-07	7	1	2444	22764
[OVER]	GO:0043022	ribosome binding	MOLECULAR_FUNCTION	4.29791e-06	6.12944e-07	12	12	2439	22753
[OVER]	GO:0003724	RNA helicase activity	MOLECULAR_FUNCTION	4.31594e-06	6.1608e-07	13	15	2438	22750
[OVER]	GO:0015947	methane metabolic process	BIOLOGICAL_PROCESS	5.2475e-06	7.566e-07	10	7	2441	22758
[OVER]	GO:0016540	protein autoprocessing	BIOLOGICAL_PROCESS	5.61819e-06	8.38689e-07	6	0	2445	22765
[OVER]	GO:0006843	mitochondrial citrate transmembrane transport	BIOLOGICAL_PROCESS	5.61819e-06	8.38689e-07	6	0	2445	22765
[OVER]	GO:1901006	ubiquinone-6 biosynthetic process	BIOLOGICAL_PROCESS	5.61819e-06	8.38689e-07	6	0	2445	22765
[OVER]	GO:0044210	'de novo' CTP biosynthetic process	BIOLOGICAL_PROCESS	5.61819e-06	8.38689e-07	6	0	2445	22765
[OVER]	GO:0015742	alpha-ketoglutarate transport	BIOLOGICAL_PROCESS	5.61819e-06	8.38689e-07	6	0	2445	22765
[OVER]	GO:0006086	acetyl-CoA biosynthetic process from pyruvate	BIOLOGICAL_PROCESS	5.61819e-06	8.38689e-07	6	0	2445	22765
[OVER]	GO:0005371	tricarboxylate secondary active transmembrane transporter activity	MOLECULAR_FUNCTION	5.61819e-06	8.38689e-07	6	0	2445	22765
[OVER]	GO:0003922	GMP synthase (glutamine-hydrolyzing) activity	MOLECULAR_FUNCTION	5.61819e-06	8.38689e-07	6	0	2445	22765
[OVER]	GO:0004160	dihydroxy-acid dehydratase activity	MOLECULAR_FUNCTION	5.61819e-06	8.38689e-07	6	0	2445	22765
[OVER]	GO:0004634	phosphopyruvate hydratase activity	MOLECULAR_FUNCTION	5.61819e-06	8.38689e-07	6	0	2445	22765
[OVER]	GO:0004343	glucosamine 6-phosphate N-acetyltransferase activity	MOLECULAR_FUNCTION	5.61819e-06	8.38689e-07	6	0	2445	22765
[OVER]	GO:0003883	CTP synthase activity	MOLECULAR_FUNCTION	5.61819e-06	8.38689e-07	6	0	2445	22765
[OVER]	GO:0046570	methylthioribulose 1-phosphate dehydratase activity	MOLECULAR_FUNCTION	5.61819e-06	8.38689e-07	6	0	2445	22765
[OVER]	GO:0005751	mitochondrial respiratory chain complex IV	CELLULAR_COMPONENT	5.61819e-06	8.38689e-07	6	0	2445	22765
[OVER]	GO:0000936	primary cell septum	CELLULAR_COMPONENT	5.61819e-06	8.38689e-07	6	0	2445	22765
[OVER]	GO:0000015	phosphopyruvate hydratase complex	CELLULAR_COMPONENT	5.61819e-06	8.38689e-07	6	0	2445	22765
[OVER]	GO:0009353	mitochondrial oxoglutarate dehydrogenase complex	CELLULAR_COMPONENT	5.61819e-06	8.38689e-07	6	0	2445	22765
[OVER]	GO:0000221	vacuolar proton-transporting V-type ATPase, V1 domain	CELLULAR_COMPONENT	5.61819e-06	8.38689e-07	6	0	2445	22765
[OVER]	GO:0005621	cellular bud scar	CELLULAR_COMPONENT	5.61819e-06	8.38689e-07	6	0	2445	22765
[OVER]	GO:0001302	replicative cell aging	BIOLOGICAL_PROCESS	5.94122e-06	8.88465e-07	14	19	2437	22746
[OVER]	GO:0043332	mating projection tip	CELLULAR_COMPONENT	6.13227e-06	9.17837e-07	19	38	2432	22727
[OVER]	GO:0006353	DNA-templated transcription, termination	BIOLOGICAL_PROCESS	6.17161e-06	9.24532e-07	17	30	2434	22735
[OVER]	GO:0042026	protein refolding	BIOLOGICAL_PROCESS	6.41687e-06	9.70498e-07	9	5	2442	22760
[OVER]	GO:0019509	L-methionine salvage from methylthioadenosine	BIOLOGICAL_PROCESS	6.52856e-06	9.93365e-07	8	3	2443	22762
[OVER]	GO:0038083	peptidyl-tyrosine autophosphorylation	BIOLOGICAL_PROCESS	6.52856e-06	9.93365e-07	8	3	2443	22762
[OVER]	GO:0000329	fungal-type vacuole membrane	CELLULAR_COMPONENT	1.05145e-05	1.62185e-06	31	98	2420	22667
[OVER]	GO:0019904	protein domain specific binding	MOLECULAR_FUNCTION	1.17416e-05	1.82647e-06	11	11	2440	22754
[OVER]	GO:0004722	protein serine/threonine phosphatase activity	MOLECULAR_FUNCTION	1.50881e-05	2.3786e-06	15	25	2436	22740
[OVER]	GO:0030100	regulation of endocytosis	BIOLOGICAL_PROCESS	1.54438e-05	2.45285e-06	7	2	2444	22763
[OVER]	GO:0019284	L-methionine salvage from S-adenosylmethionine	BIOLOGICAL_PROCESS	1.54438e-05	2.45285e-06	7	2	2444	22763
[UNDER]	GO:0046873	metal ion transmembrane transporter activity	MOLECULAR_FUNCTION	1.64855e-05	2.63768e-06	1	158	2450	22607
[OVER]	GO:0000028	ribosomal small subunit assembly	BIOLOGICAL_PROCESS	1.69024e-05	2.72427e-06	8	4	2443	22761
[OVER]	GO:1990443	peptidyl-threonine autophosphorylation	BIOLOGICAL_PROCESS	1.69024e-05	2.72427e-06	8	4	2443	22761
[OVER]	GO:0007035	vacuolar acidification	BIOLOGICAL_PROCESS	1.84314e-05	2.9924e-06	10	9	2441	22756
[OVER]	GO:0002098	tRNA wobble uridine modification	BIOLOGICAL_PROCESS	1.9125e-05	3.11e-06	14	22	2437	22743
[OVER]	GO:0000131	incipient cellular bud site	CELLULAR_COMPONENT	2.77501e-05	4.5561e-06	14	23	2437	22742
[OVER]	GO:0000921	septin ring assembly	BIOLOGICAL_PROCESS	3.21705e-05	5.38278e-06	6	1	2445	22764
[OVER]	GO:0009423	chorismate biosynthetic process	BIOLOGICAL_PROCESS	3.21705e-05	5.38278e-06	6	1	2445	22764
[OVER]	GO:0016320	endoplasmic reticulum membrane fusion	BIOLOGICAL_PROCESS	3.21705e-05	5.38278e-06	6	1	2445	22764
[OVER]	GO:0003849	3-deoxy-7-phosphoheptulonate synthase activity	MOLECULAR_FUNCTION	3.21705e-05	5.38278e-06	6	1	2445	22764
[OVER]	GO:0000839	Hrd1p ubiquitin ligase ERAD-L complex	CELLULAR_COMPONENT	3.21705e-05	5.38278e-06	6	1	2445	22764
[OVER]	GO:0071563	Myo2p-Vac17p-Vac8p transport complex	CELLULAR_COMPONENT	3.21705e-05	5.38278e-06	6	1	2445	22764
[OVER]	GO:0036289	peptidyl-serine autophosphorylation	BIOLOGICAL_PROCESS	3.80782e-05	6.47578e-06	8	5	2443	22760
[OVER]	GO:0004609	phosphatidylserine decarboxylase activity	MOLECULAR_FUNCTION	3.80782e-05	6.47578e-06	8	5	2443	22760
[OVER]	GO:0019482	beta-alanine metabolic process	BIOLOGICAL_PROCESS	4.3741e-05	7.48457e-06	7	3	2444	22762
[OVER]	GO:0042450	arginine biosynthetic process via ornithine	BIOLOGICAL_PROCESS	4.3741e-05	7.48457e-06	7	3	2444	22762
[OVER]	GO:0090441	trehalose biosynthesis in response to heat stress	BIOLOGICAL_PROCESS	4.95353e-05	8.6444e-06	5	0	2446	22765
[OVER]	GO:0052837	thiazole biosynthetic process	BIOLOGICAL_PROCESS	4.95353e-05	8.6444e-06	5	0	2446	22765
[OVER]	GO:0006102	isocitrate metabolic process	BIOLOGICAL_PROCESS	4.95353e-05	8.6444e-06	5	0	2446	22765
[OVER]	GO:0034517	ribophagy	BIOLOGICAL_PROCESS	4.95353e-05	8.6444e-06	5	0	2446	22765
[OVER]	GO:0004450	isocitrate dehydrogenase (NADP+) activity	MOLECULAR_FUNCTION	4.95353e-05	8.6444e-06	5	0	2446	22765
[OVER]	GO:0004345	glucose-6-phosphate dehydrogenase activity	MOLECULAR_FUNCTION	4.95353e-05	8.6444e-06	5	0	2446	22765
[OVER]	GO:0003825	alpha,alpha-trehalose-phosphate synthase (UDP-forming) activity	MOLECULAR_FUNCTION	4.95353e-05	8.6444e-06	5	0	2446	22765
[OVER]	GO:0001400	mating projection base	CELLULAR_COMPONENT	4.95353e-05	8.6444e-06	5	0	2446	22765
[OVER]	GO:0000144	cellular bud neck septin ring	CELLULAR_COMPONENT	4.95353e-05	8.6444e-06	5	0	2446	22765
[OVER]	GO:0033254	vacuolar transporter chaperone complex	CELLULAR_COMPONENT	4.95353e-05	8.6444e-06	5	0	2446	22765
[UNDER]	GO:0016705	oxidoreductase activity, acting on paired donors, with incorporation or reduction of molecular oxygen	MOLECULAR_FUNCTION	5.31513e-05	9.32208e-06	10	308	2441	22457
[OVER]	GO:0046950	cellular ketone body metabolic process	BIOLOGICAL_PROCESS	7.82335e-05	1.38161e-05	8	6	2443	22759
[OVER]	GO:0042147	retrograde transport, endosome to Golgi	BIOLOGICAL_PROCESS	7.83164e-05	1.3841e-05	11	15	2440	22750
[OVER]	GO:0046580	negative regulation of Ras protein signal transduction	BIOLOGICAL_PROCESS	9.22645e-05	1.64026e-05	9	9	2442	22756
[OVER]	GO:0000027	ribosomal large subunit assembly	BIOLOGICAL_PROCESS	9.39053e-05	1.67188e-05	12	19	2439	22746
[OVER]	GO:0045121	membrane raft	CELLULAR_COMPONENT	0.000104311	1.88442e-05	7	4	2444	22761
[OVER]	GO:0006560	proline metabolic process	BIOLOGICAL_PROCESS	0.000107118	1.93652e-05	27	88	2424	22677
[OVER]	GO:0031134	sister chromatid biorientation	BIOLOGICAL_PROCESS	0.000108277	1.97446e-05	6	2	2445	22763
[OVER]	GO:0030476	ascospore wall assembly	BIOLOGICAL_PROCESS	0.000108277	1.97446e-05	6	2	2445	22763
[OVER]	GO:0006564	L-serine biosynthetic process	BIOLOGICAL_PROCESS	0.000108277	1.97446e-05	6	2	2445	22763
[OVER]	GO:0003942	N-acetyl-gamma-glutamyl-phosphate reductase activity	MOLECULAR_FUNCTION	0.000108277	1.97446e-05	6	2	2445	22763
[OVER]	GO:0032432	actin filament bundle	CELLULAR_COMPONENT	0.000108277	1.97446e-05	6	2	2445	22763
[OVER]	GO:0061638	CENP-A containing chromatin	CELLULAR_COMPONENT	0.000108277	1.97446e-05	6	2	2445	22763
[OVER]	GO:0008250	oligosaccharyltransferase complex	CELLULAR_COMPONENT	0.000108277	1.97446e-05	6	2	2445	22763
[OVER]	GO:0005768	endosome	CELLULAR_COMPONENT	0.000122786	2.24866e-05	25	81	2426	22684
[OVER]	GO:0051447	negative regulation of meiotic cell cycle	BIOLOGICAL_PROCESS	0.000140037	2.57192e-05	10	13	2441	22752
[OVER]	GO:0000001	mitochondrion inheritance	BIOLOGICAL_PROCESS	0.000146164	2.70738e-05	8	7	2443	22758
[OVER]	GO:0006123	mitochondrial electron transport, cytochrome c to oxygen	BIOLOGICAL_PROCESS	0.000146164	2.70738e-05	8	7	2443	22758
[OVER]	GO:0004129	cytochrome-c oxidase activity	MOLECULAR_FUNCTION	0.000146164	2.70738e-05	8	7	2443	22758
[OVER]	GO:0004096	catalase activity	MOLECULAR_FUNCTION	0.000146164	2.70738e-05	8	7	2443	22758
[OVER]	GO:0005826	actomyosin contractile ring	CELLULAR_COMPONENT	0.000153171	2.84717e-05	9	10	2442	22755
[OVER]	GO:0071255	Cvt vesicle assembly	BIOLOGICAL_PROCESS	0.000246751	4.76729e-05	5	1	2446	22764
[OVER]	GO:0006546	glycine catabolic process	BIOLOGICAL_PROCESS	0.000246751	4.76729e-05	5	1	2446	22764
[OVER]	GO:0006404	RNA import into nucleus	BIOLOGICAL_PROCESS	0.000246751	4.76729e-05	5	1	2446	22764
[OVER]	GO:0071562	nucleus-vacuole junction assembly	BIOLOGICAL_PROCESS	0.000246751	4.76729e-05	5	1	2446	22764
[OVER]	GO:0006545	glycine biosynthetic process	BIOLOGICAL_PROCESS	0.000246751	4.76729e-05	5	1	2446	22764
[OVER]	GO:0071901	negative regulation of protein serine/threonine kinase activity	BIOLOGICAL_PROCESS	0.000246751	4.70571e-05	11	18	2440	22747
[OVER]	GO:0004471	malate dehydrogenase (decarboxylating) (NAD+) activity	MOLECULAR_FUNCTION	0.000246751	4.76729e-05	5	1	2446	22764
[OVER]	GO:0004075	biotin carboxylase activity	MOLECULAR_FUNCTION	0.000246751	4.76729e-05	5	1	2446	22764
[OVER]	GO:0004591	oxoglutarate dehydrogenase (succinyl-transferring) activity	MOLECULAR_FUNCTION	0.000246751	4.76729e-05	5	1	2446	22764
[OVER]	GO:0016597	amino acid binding	MOLECULAR_FUNCTION	0.000246751	4.72981e-05	9	11	2442	22754
[OVER]	GO:0070273	phosphatidylinositol-4-phosphate binding	MOLECULAR_FUNCTION	0.000246751	4.76729e-05	5	1	2446	22764
[OVER]	GO:0005884	actin filament	CELLULAR_COMPONENT	0.000246751	4.76729e-05	5	1	2446	22764
[OVER]	GO:0009343	biotin carboxylase complex	CELLULAR_COMPONENT	0.000246751	4.76729e-05	5	1	2446	22764
[OVER]	GO:0031428	box C/D snoRNP complex	CELLULAR_COMPONENT	0.000246751	4.76729e-05	5	1	2446	22764
[OVER]	GO:0031011	Ino80 complex	CELLULAR_COMPONENT	0.000246751	4.70571e-05	11	18	2440	22747
[OVER]	GO:0000346	transcription export complex	CELLULAR_COMPONENT	0.000246751	4.76729e-05	5	1	2446	22764
[OVER]	GO:0004190	aspartic-type endopeptidase activity	MOLECULAR_FUNCTION	0.000254022	4.92437e-05	12	22	2439	22743
[OVER]	GO:0060237	regulation of fungal-type cell wall organization	BIOLOGICAL_PROCESS	0.000277814	5.4328e-05	6	3	2445	22762
[OVER]	GO:0006122	mitochondrial electron transport, ubiquinol to cytochrome c	BIOLOGICAL_PROCESS	0.000277814	5.4328e-05	6	3	2445	22762
[OVER]	GO:0000742	karyogamy involved in conjugation with cellular fusion	BIOLOGICAL_PROCESS	0.000277814	5.4328e-05	6	3	2445	22762
[OVER]	GO:0004652	polynucleotide adenylyltransferase activity	MOLECULAR_FUNCTION	0.000277814	5.4328e-05	6	3	2445	22762
[OVER]	GO:0003862	3-isopropylmalate dehydrogenase activity	MOLECULAR_FUNCTION	0.000277814	5.4328e-05	6	3	2445	22762
[OVER]	GO:0005750	mitochondrial respiratory chain complex III	CELLULAR_COMPONENT	0.000277814	5.4328e-05	6	3	2445	22762
[OVER]	GO:0000413	protein peptidyl-prolyl isomerization	BIOLOGICAL_PROCESS	0.000312157	6.12481e-05	10	15	2441	22750
[OVER]	GO:0003755	peptidyl-prolyl cis-trans isomerase activity	MOLECULAR_FUNCTION	0.000312157	6.12481e-05	10	15	2441	22750
[OVER]	GO:0005628	prospore membrane	CELLULAR_COMPONENT	0.000414376	8.21711e-05	7	6	2444	22759
[OVER]	GO:1990611	regulation of cytoplasmic translational initiation in response to stress	BIOLOGICAL_PROCESS	0.000431507	8.90652e-05	4	0	2447	22765
[OVER]	GO:0035269	protein O-linked mannosylation	BIOLOGICAL_PROCESS	0.000431507	8.90652e-05	4	0	2447	22765
[OVER]	GO:0016576	histone dephosphorylation	BIOLOGICAL_PROCESS	0.000431507	8.90652e-05	4	0	2447	22765
[OVER]	GO:0061166	establishment of endoplasmic reticulum localization involved in endoplasmic reticulum polarization at cell division site	BIOLOGICAL_PROCESS	0.000431507	8.90652e-05	4	0	2447	22765
[OVER]	GO:0006799	polyphosphate biosynthetic process	BIOLOGICAL_PROCESS	0.000431507	8.90652e-05	4	0	2447	22765
[OVER]	GO:1990171	SCF complex disassembly in response to cadmium stress	BIOLOGICAL_PROCESS	0.000431507	8.90652e-05	4	0	2447	22765
[OVER]	GO:0051289	protein homotetramerization	BIOLOGICAL_PROCESS	0.000431507	8.90652e-05	4	0	2447	22765
[OVER]	GO:0070814	hydrogen sulfide biosynthetic process	BIOLOGICAL_PROCESS	0.000431507	8.90652e-05	4	0	2447	22765
[OVER]	GO:1990120	messenger ribonucleoprotein complex assembly	BIOLOGICAL_PROCESS	0.000431507	8.90652e-05	4	0	2447	22765
[OVER]	GO:0034063	stress granule assembly	BIOLOGICAL_PROCESS	0.000431507	8.90652e-05	4	0	2447	22765
[OVER]	GO:2001168	positive regulation of histone H2B ubiquitination	BIOLOGICAL_PROCESS	0.000431507	8.90652e-05	4	0	2447	22765
[OVER]	GO:0019346	transsulfuration	BIOLOGICAL_PROCESS	0.000431507	8.90652e-05	4	0	2447	22765
[OVER]	GO:0004073	aspartate-semialdehyde dehydrogenase activity	MOLECULAR_FUNCTION	0.000431507	8.90652e-05	4	0	2447	22765
[OVER]	GO:0003985	acetyl-CoA C-acetyltransferase activity	MOLECULAR_FUNCTION	0.000431507	8.90652e-05	4	0	2447	22765
[OVER]	GO:0004555	alpha,alpha-trehalase activity	MOLECULAR_FUNCTION	0.000431507	8.90652e-05	4	0	2447	22765
[OVER]	GO:0050038	L-xylulose reductase (NADP+) activity	MOLECULAR_FUNCTION	0.000431507	8.90652e-05	4	0	2447	22765
[OVER]	GO:0008976	polyphosphate kinase activity	MOLECULAR_FUNCTION	0.000431507	8.90652e-05	4	0	2447	22765
[OVER]	GO:0004169	dolichyl-phosphate-mannose-protein mannosyltransferase activity	MOLECULAR_FUNCTION	0.000431507	8.90652e-05	4	0	2447	22765
[OVER]	GO:0005534	galactose binding	MOLECULAR_FUNCTION	0.000431507	8.90652e-05	4	0	2447	22765
[OVER]	GO:0042030	ATPase inhibitor activity	MOLECULAR_FUNCTION	0.000431507	8.90652e-05	4	0	2447	22765
[OVER]	GO:1990446	U1 snRNP binding	MOLECULAR_FUNCTION	0.000431507	8.90652e-05	4	0	2447	22765
[OVER]	GO:0050085	mannitol 2-dehydrogenase (NADP+) activity	MOLECULAR_FUNCTION	0.000431507	8.90652e-05	4	0	2447	22765
[OVER]	GO:0003756	protein disulfide isomerase activity	MOLECULAR_FUNCTION	0.000431507	8.90652e-05	4	0	2447	22765
[OVER]	GO:0004306	ethanolamine-phosphate cytidylyltransferase activity	MOLECULAR_FUNCTION	0.000431507	8.90652e-05	4	0	2447	22765
[OVER]	GO:0004754	saccharopine dehydrogenase (NAD+, L-lysine-forming) activity	MOLECULAR_FUNCTION	0.000431507	8.90652e-05	4	0	2447	22765
[OVER]	GO:0004335	galactokinase activity	MOLECULAR_FUNCTION	0.000431507	8.90652e-05	4	0	2447	22765
[OVER]	GO:0004365	glyceraldehyde-3-phosphate dehydrogenase (NAD+) (phosphorylating) activity	MOLECULAR_FUNCTION	0.000431507	8.90652e-05	4	0	2447	22765
[OVER]	GO:0004372	glycine hydroxymethyltransferase activity	MOLECULAR_FUNCTION	0.000431507	8.90652e-05	4	0	2447	22765
[OVER]	GO:0004375	glycine dehydrogenase (decarboxylating) activity	MOLECULAR_FUNCTION	0.000431507	8.90652e-05	4	0	2447	22765
[OVER]	GO:0005756	mitochondrial proton-transporting ATP synthase, central stalk	CELLULAR_COMPONENT	0.000431507	8.90652e-05	4	0	2447	22765
[OVER]	GO:0009358	polyphosphate kinase complex	CELLULAR_COMPONENT	0.000431507	8.90652e-05	4	0	2447	22765
[OVER]	GO:1990567	DPS complex	CELLULAR_COMPONENT	0.000431507	8.90652e-05	4	0	2447	22765
[OVER]	GO:1990467	NuA3a histone acetyltransferase complex	CELLULAR_COMPONENT	0.000431507	8.90652e-05	4	0	2447	22765
[OVER]	GO:1990468	NuA3b histone acetyltransferase complex	CELLULAR_COMPONENT	0.000431507	8.90652e-05	4	0	2447	22765
[OVER]	GO:0030976	thiamine pyrophosphate binding	MOLECULAR_FUNCTION	0.000559619	0.000116971	9	13	2442	22752
[OVER]	GO:0005200	structural constituent of cytoskeleton	MOLECULAR_FUNCTION	0.000559619	0.000116971	9	13	2442	22752
[OVER]	GO:0016559	peroxisome fission	BIOLOGICAL_PROCESS	0.000592986	0.000124593	6	4	2445	22761
[OVER]	GO:0035838	growing cell tip	CELLULAR_COMPONENT	0.000592986	0.000124593	6	4	2445	22761
[OVER]	GO:0030433	ubiquitin-dependent ERAD pathway	BIOLOGICAL_PROCESS	0.000628858	0.000133334	11	21	2440	22744
[OVER]	GO:0009088	threonine biosynthetic process	BIOLOGICAL_PROCESS	0.000661224	0.000140888	8	10	2443	22755
[OVER]	GO:0004713	protein tyrosine kinase activity	MOLECULAR_FUNCTION	0.000661224	0.000140888	8	10	2443	22755
[OVER]	GO:0009448	gamma-aminobutyric acid metabolic process	BIOLOGICAL_PROCESS	0.000703436	0.000150526	7	7	2444	22758
[OVER]	GO:0060988	lipid tube assembly	BIOLOGICAL_PROCESS	0.000711211	0.000153398	5	2	2446	22763
[OVER]	GO:0071630	nuclear protein quality control by the ubiquitin-proteasome system	BIOLOGICAL_PROCESS	0.000711211	0.000153398	5	2	2446	22763
[OVER]	GO:0019430	removal of superoxide radicals	BIOLOGICAL_PROCESS	0.000711211	0.000153398	5	2	2446	22763
[OVER]	GO:0005092	GDP-dissociation inhibitor activity	MOLECULAR_FUNCTION	0.000711211	0.000153398	5	2	2446	22763
[OVER]	GO:0016579	protein deubiquitination	BIOLOGICAL_PROCESS	0.000760771	0.000164585	14	35	2437	22730
[OVER]	GO:0006020	inositol metabolic process	BIOLOGICAL_PROCESS	0.000808909	0.000175634	9	14	2442	22751
[OVER]	GO:0004843	thiol-dependent ubiquitin-specific protease activity	MOLECULAR_FUNCTION	0.000839658	0.00018253	11	22	2440	22743
[UNDER]	GO:0008643	carbohydrate transport	BIOLOGICAL_PROCESS	0.00093567	0.000203768	0	87	2451	22678
[OVER]	GO:0009228	thiamine biosynthetic process	BIOLOGICAL_PROCESS	0.00101747	0.000222646	8	11	2443	22754
[OVER]	GO:0051537	2 iron, 2 sulfur cluster binding	MOLECULAR_FUNCTION	0.00112478	0.000246275	11	23	2440	22742
[OVER]	GO:0006998	nuclear envelope organization	BIOLOGICAL_PROCESS	0.00114519	0.000251492	6	5	2445	22760
[OVER]	GO:0006282	regulation of DNA repair	BIOLOGICAL_PROCESS	0.00164813	0.000366897	9	16	2442	22749
[OVER]	GO:0003774	motor activity	MOLECULAR_FUNCTION	0.0016725	0.00037254	12	29	2439	22736
[OVER]	GO:0006167	AMP biosynthetic process	BIOLOGICAL_PROCESS	0.00167594	0.000376155	5	3	2446	22762
[OVER]	GO:0009298	GDP-mannose biosynthetic process	BIOLOGICAL_PROCESS	0.00167594	0.000376155	5	3	2446	22762
[OVER]	GO:0004056	argininosuccinate lyase activity	MOLECULAR_FUNCTION	0.00167594	0.000376155	5	3	2446	22762
[OVER]	GO:0071561	nucleus-vacuole junction	CELLULAR_COMPONENT	0.00167594	0.000376155	5	3	2446	22762
[OVER]	GO:0006621	protein retention in ER lumen	BIOLOGICAL_PROCESS	0.00180484	0.000410749	4	1	2447	22764
[OVER]	GO:0018279	protein N-linked glycosylation via asparagine	BIOLOGICAL_PROCESS	0.00180484	0.000410749	4	1	2447	22764
[OVER]	GO:0005997	xylulose metabolic process	BIOLOGICAL_PROCESS	0.00180484	0.000410749	4	1	2447	22764
[OVER]	GO:0010950	positive regulation of endopeptidase activity	BIOLOGICAL_PROCESS	0.00180484	0.000410749	4	1	2447	22764
[OVER]	GO:0035307	positive regulation of protein dephosphorylation	BIOLOGICAL_PROCESS	0.00180484	0.000410749	4	1	2447	22764
[OVER]	GO:0008379	thioredoxin peroxidase activity	MOLECULAR_FUNCTION	0.00180484	0.000410749	4	1	2447	22764
[OVER]	GO:0061133	endopeptidase activator activity	MOLECULAR_FUNCTION	0.00180484	0.000410749	4	1	2447	22764
[OVER]	GO:0005516	calmodulin binding	MOLECULAR_FUNCTION	0.00180484	0.000410749	4	1	2447	22764
[OVER]	GO:0000774	adenyl-nucleotide exchange factor activity	MOLECULAR_FUNCTION	0.00180484	0.000410749	4	1	2447	22764
[OVER]	GO:0035839	non-growing cell tip	CELLULAR_COMPONENT	0.00180484	0.000410749	4	1	2447	22764
[OVER]	GO:0050821	protein stabilization	BIOLOGICAL_PROCESS	0.00184724	0.000421121	7	9	2444	22756
[OVER]	GO:0042542	response to hydrogen peroxide	BIOLOGICAL_PROCESS	0.00201888	0.000461572	6	6	2445	22759
[OVER]	GO:0015035	protein disulfide oxidoreductase activity	MOLECULAR_FUNCTION	0.00276368	0.000640885	10	22	2441	22743
[OVER]	GO:0007094	mitotic spindle assembly checkpoint	BIOLOGICAL_PROCESS	0.00282256	0.000656014	7	10	2444	22755
[OVER]	GO:0007117	budding cell bud growth	BIOLOGICAL_PROCESS	0.00282256	0.000656014	7	10	2444	22755
[OVER]	GO:0006906	vesicle fusion	BIOLOGICAL_PROCESS	0.00308768	0.000719455	11	27	2440	22738
[OVER]	GO:0043495	protein membrane anchor	MOLECULAR_FUNCTION	0.00333057	0.000778438	5	4	2446	22761
[OVER]	GO:0031310	intrinsic component of vacuolar membrane	CELLULAR_COMPONENT	0.00333057	0.000778438	5	4	2446	22761
[OVER]	GO:0030702	chromatin silencing at centromere	BIOLOGICAL_PROCESS	0.00334192	0.000786772	6	7	2445	22758
[OVER]	GO:0006207	'de novo' pyrimidine nucleobase biosynthetic process	BIOLOGICAL_PROCESS	0.00334192	0.000786772	6	7	2445	22758
[OVER]	GO:0090114	COPII-coated vesicle budding	BIOLOGICAL_PROCESS	0.00334192	0.000786772	6	7	2445	22758
[OVER]	GO:0008137	NADH dehydrogenase (ubiquinone) activity	MOLECULAR_FUNCTION	0.00334192	0.000786772	6	7	2445	22758
[OVER]	GO:0030139	endocytic vesicle	CELLULAR_COMPONENT	0.00334192	0.000786772	6	7	2445	22758
[OVER]	GO:0060188	regulation of protein desumoylation	BIOLOGICAL_PROCESS	0.00372677	0.000917321	3	0	2448	22765
[OVER]	GO:0001320	age-dependent response to reactive oxygen species involved in chronological cell aging	BIOLOGICAL_PROCESS	0.00372677	0.000917321	3	0	2448	22765
[OVER]	GO:0080129	proteasome core complex assembly	BIOLOGICAL_PROCESS	0.00372677	0.000917321	3	0	2448	22765
[OVER]	GO:0042866	pyruvate biosynthetic process	BIOLOGICAL_PROCESS	0.00372677	0.000917321	3	0	2448	22765
[OVER]	GO:0045903	positive regulation of translational fidelity	BIOLOGICAL_PROCESS	0.00372677	0.000917321	3	0	2448	22765
[OVER]	GO:0045901	positive regulation of translational elongation	BIOLOGICAL_PROCESS	0.00372677	0.000917321	3	0	2448	22765
[OVER]	GO:0010848	regulation of chromatin disassembly	BIOLOGICAL_PROCESS	0.00372677	0.000917321	3	0	2448	22765
[OVER]	GO:0044571	[2Fe-2S] cluster assembly	BIOLOGICAL_PROCESS	0.00372677	0.000917321	3	0	2448	22765
[OVER]	GO:0034316	negative regulation of Arp2/3 complex-mediated actin nucleation	BIOLOGICAL_PROCESS	0.00372677	0.000917321	3	0	2448	22765
[OVER]	GO:1903643	positive regulation of recombination hotspot binding	BIOLOGICAL_PROCESS	0.00372677	0.000917321	3	0	2448	22765
[OVER]	GO:0005993	trehalose catabolic process	BIOLOGICAL_PROCESS	0.00372677	0.000917321	3	0	2448	22765
[OVER]	GO:1900101	regulation of endoplasmic reticulum unfolded protein response	BIOLOGICAL_PROCESS	0.00372677	0.000917321	3	0	2448	22765
[OVER]	GO:0006427	histidyl-tRNA aminoacylation	BIOLOGICAL_PROCESS	0.00372677	0.000917321	3	0	2448	22765
[OVER]	GO:0061621	canonical glycolysis	BIOLOGICAL_PROCESS	0.00372677	0.000917321	3	0	2448	22765
[OVER]	GO:0002109	maturation of SSU-rRNA from tricistronic rRNA transcript (SSU-rRNA, LSU-rRNA,5S)	BIOLOGICAL_PROCESS	0.00372677	0.000917321	3	0	2448	22765
[OVER]	GO:1902629	regulation of mRNA stability involved in cellular response to UV	BIOLOGICAL_PROCESS	0.00372677	0.000917321	3	0	2448	22765
[OVER]	GO:0019343	cysteine biosynthetic process via cystathionine	BIOLOGICAL_PROCESS	0.00372677	0.000917321	3	0	2448	22765
[OVER]	GO:0031081	nuclear pore distribution	BIOLOGICAL_PROCESS	0.00372677	0.000917321	3	0	2448	22765
[OVER]	GO:0004421	hydroxymethylglutaryl-CoA synthase activity	MOLECULAR_FUNCTION	0.00372677	0.000917321	3	0	2448	22765
[OVER]	GO:0004458	D-lactate dehydrogenase (cytochrome) activity	MOLECULAR_FUNCTION	0.00372677	0.000917321	3	0	2448	22765
[OVER]	GO:0004475	mannose-1-phosphate guanylyltransferase activity	MOLECULAR_FUNCTION	0.00372677	0.000917321	3	0	2448	22765
[OVER]	GO:0004020	adenylylsulfate kinase activity	MOLECULAR_FUNCTION	0.00372677	0.000917321	3	0	2448	22765
[OVER]	GO:0004044	amidophosphoribosyltransferase activity	MOLECULAR_FUNCTION	0.00372677	0.000917321	3	0	2448	22765
[OVER]	GO:0004821	histidine-tRNA ligase activity	MOLECULAR_FUNCTION	0.00372677	0.000917321	3	0	2448	22765
[OVER]	GO:0004805	trehalose-phosphatase activity	MOLECULAR_FUNCTION	0.00372677	0.000917321	3	0	2448	22765
[OVER]	GO:0004839	ubiquitin activating enzyme activity	MOLECULAR_FUNCTION	0.00372677	0.000917321	3	0	2448	22765
[OVER]	GO:0004512	inositol-3-phosphate synthase activity	MOLECULAR_FUNCTION	0.00372677	0.000917321	3	0	2448	22765
[OVER]	GO:0051787	misfolded protein binding	MOLECULAR_FUNCTION	0.00372677	0.000917321	3	0	2448	22765
[OVER]	GO:0004151	dihydroorotase activity	MOLECULAR_FUNCTION	0.00372677	0.000917321	3	0	2448	22765
[OVER]	GO:0004176	ATP-dependent peptidase activity	MOLECULAR_FUNCTION	0.00372677	0.000917321	3	0	2448	22765
[OVER]	GO:0016909	SAP kinase activity	MOLECULAR_FUNCTION	0.00372677	0.000917321	3	0	2448	22765
[OVER]	GO:0070180	large ribosomal subunit rRNA binding	MOLECULAR_FUNCTION	0.00372677	0.000917321	3	0	2448	22765
[OVER]	GO:0030955	potassium ion binding	MOLECULAR_FUNCTION	0.00372677	0.000917321	3	0	2448	22765
[OVER]	GO:0004354	glutamate dehydrogenase (NADP+) activity	MOLECULAR_FUNCTION	0.00372677	0.000917321	3	0	2448	22765
[OVER]	GO:0050661	NADP binding	MOLECULAR_FUNCTION	0.00372677	0.000891392	23	94	2428	22671
[OVER]	GO:0004362	glutathione-disulfide reductase activity	MOLECULAR_FUNCTION	0.00372677	0.000917321	3	0	2448	22765
[OVER]	GO:0003861	3-isopropylmalate dehydratase activity	MOLECULAR_FUNCTION	0.00372677	0.000917321	3	0	2448	22765
[OVER]	GO:0004743	pyruvate kinase activity	MOLECULAR_FUNCTION	0.00372677	0.000917321	3	0	2448	22765
[OVER]	GO:0003867	4-aminobutyrate transaminase activity	MOLECULAR_FUNCTION	0.00372677	0.000917321	3	0	2448	22765
[OVER]	GO:0005754	mitochondrial proton-transporting ATP synthase, catalytic core	CELLULAR_COMPONENT	0.00372677	0.000917321	3	0	2448	22765
[OVER]	GO:0044614	nuclear pore cytoplasmic filaments	CELLULAR_COMPONENT	0.00372677	0.000917321	3	0	2448	22765
[OVER]	GO:0009316	3-isopropylmalate dehydratase complex	CELLULAR_COMPONENT	0.00372677	0.000917321	3	0	2448	22765
[OVER]	GO:0009337	sulfite reductase complex (NADPH)	CELLULAR_COMPONENT	0.00372677	0.000917321	3	0	2448	22765
[OVER]	GO:0032160	septin filament array	CELLULAR_COMPONENT	0.00372677	0.000917321	3	0	2448	22765
[OVER]	GO:0005835	fatty acid synthase complex	CELLULAR_COMPONENT	0.00372677	0.000917321	3	0	2448	22765
[OVER]	GO:0017102	methionyl glutamyl tRNA synthetase complex	CELLULAR_COMPONENT	0.00372677	0.000917321	3	0	2448	22765
[OVER]	GO:0017117	single-stranded DNA-dependent ATP-dependent DNA helicase complex	CELLULAR_COMPONENT	0.00372677	0.000917321	3	0	2448	22765
[OVER]	GO:0070971	endoplasmic reticulum exit site	CELLULAR_COMPONENT	0.00372677	0.000917321	3	0	2448	22765
[OVER]	GO:0000274	mitochondrial proton-transporting ATP synthase, stator stalk	CELLULAR_COMPONENT	0.00372677	0.000917321	3	0	2448	22765
[OVER]	GO:0031518	CBF3 complex	CELLULAR_COMPONENT	0.00372677	0.000917321	3	0	2448	22765
[OVER]	GO:0017177	glucosidase II complex	CELLULAR_COMPONENT	0.00372677	0.000917321	3	0	2448	22765
[OVER]	GO:0000932	P-body	CELLULAR_COMPONENT	0.00384832	0.000948246	9	19	2442	22746
[OVER]	GO:0000103	sulfate assimilation	BIOLOGICAL_PROCESS	0.00398635	0.000983821	7	11	2444	22754
[OVER]	GO:0035999	tetrahydrofolate interconversion	BIOLOGICAL_PROCESS	0.00455117	0.0011369	4	2	2447	22763
[OVER]	GO:0072671	mitochondria-associated ubiquitin-dependent protein catabolic process	BIOLOGICAL_PROCESS	0.00455117	0.0011369	4	2	2447	22763
[OVER]	GO:0031204	posttranslational protein targeting to membrane, translocation	BIOLOGICAL_PROCESS	0.00455117	0.0011369	4	2	2447	22763
[OVER]	GO:1902340	negative regulation of chromosome condensation	BIOLOGICAL_PROCESS	0.00455117	0.0011369	4	2	2447	22763
[OVER]	GO:0030011	maintenance of cell polarity	BIOLOGICAL_PROCESS	0.00455117	0.0011369	4	2	2447	22763
[OVER]	GO:0004784	superoxide dismutase activity	MOLECULAR_FUNCTION	0.00455117	0.0011369	4	2	2447	22763
[OVER]	GO:0043024	ribosomal small subunit binding	MOLECULAR_FUNCTION	0.00455117	0.0011369	4	2	2447	22763
[OVER]	GO:0005788	endoplasmic reticulum lumen	CELLULAR_COMPONENT	0.00455117	0.0011369	4	2	2447	22763
[OVER]	GO:0000164	protein phosphatase type 1 complex	CELLULAR_COMPONENT	0.00455117	0.0011369	4	2	2447	22763
[OVER]	GO:0072357	PTW/PP1 phosphatase complex	CELLULAR_COMPONENT	0.00455117	0.0011369	4	2	2447	22763
[OVER]	GO:0036266	Cdc48p-Npl4p-Vms1p AAA ATPase complex	CELLULAR_COMPONENT	0.00455117	0.0011369	4	2	2447	22763
[OVER]	GO:0000781	chromosome, telomeric region	CELLULAR_COMPONENT	0.0047478	0.0011885	15	50	2436	22715
[OVER]	GO:0000812	Swr1 complex	CELLULAR_COMPONENT	0.0050387	0.00126396	6	8	2445	22757
[OVER]	GO:0072329	monocarboxylic acid catabolic process	BIOLOGICAL_PROCESS	0.00551571	0.00139154	10	25	2441	22740
[OVER]	GO:0000786	nucleosome	CELLULAR_COMPONENT	0.00551571	0.00139152	8	16	2443	22749
[OVER]	GO:0006120	mitochondrial electron transport, NADH to ubiquinone	BIOLOGICAL_PROCESS	0.00565664	0.00142784	7	12	2444	22753
[OVER]	GO:0061587	transfer RNA gene-mediated silencing	BIOLOGICAL_PROCESS	0.00566544	0.00143228	5	5	2446	22760
[OVER]	GO:0005654	nucleoplasm	CELLULAR_COMPONENT	0.00658614	0.00167107	44	239	2407	22526
[OVER]	GO:0032968	positive regulation of transcription elongation from RNA polymerase II promoter	BIOLOGICAL_PROCESS	0.00692632	0.00176101	10	26	2441	22739
[OVER]	GO:0006334	nucleosome assembly	BIOLOGICAL_PROCESS	0.00692632	0.00176101	10	26	2441	22739
[OVER]	GO:0070651	nonfunctional rRNA decay	BIOLOGICAL_PROCESS	0.00789642	0.00201384	7	13	2444	22752
[OVER]	GO:0042766	nucleosome mobilization	BIOLOGICAL_PROCESS	0.00942102	0.00244823	4	3	2447	22762
[OVER]	GO:0032456	endocytic recycling	BIOLOGICAL_PROCESS	0.00942102	0.00244823	4	3	2447	22762
[OVER]	GO:0071712	ER-associated misfolded protein catabolic process	BIOLOGICAL_PROCESS	0.00942102	0.00244823	4	3	2447	22762
[OVER]	GO:0030970	retrograde protein transport, ER to cytosol	BIOLOGICAL_PROCESS	0.00942102	0.00244823	4	3	2447	22762
[OVER]	GO:0035065	regulation of histone acetylation	BIOLOGICAL_PROCESS	0.00942102	0.00244823	4	3	2447	22762
[OVER]	GO:0030276	clathrin binding	MOLECULAR_FUNCTION	0.00942102	0.00244823	4	3	2447	22762
[OVER]	GO:0080130	L-phenylalanine:2-oxoglutarate aminotransferase activity	MOLECULAR_FUNCTION	0.00942102	0.00244823	4	3	2447	22762
[OVER]	GO:0000104	succinate dehydrogenase activity	MOLECULAR_FUNCTION	0.00942102	0.00244823	4	3	2447	22762
[OVER]	GO:0005742	mitochondrial outer membrane translocase complex	CELLULAR_COMPONENT	0.00942102	0.00244823	4	3	2447	22762
[OVER]	GO:0005797	Golgi medial cisterna	CELLULAR_COMPONENT	0.00942102	0.00244823	4	3	2447	22762
[OVER]	GO:0034098	VCP-NPL4-UFD1 AAA ATPase complex	CELLULAR_COMPONENT	0.00942102	0.00244823	4	3	2447	22762
[OVER]	GO:0005674	transcription factor TFIIF complex	CELLULAR_COMPONENT	0.00942102	0.00244823	4	3	2447	22762
[OVER]	GO:0045281	succinate dehydrogenase complex	CELLULAR_COMPONENT	0.00942102	0.00244823	4	3	2447	22762
[OVER]	GO:0016409	palmitoyltransferase activity	MOLECULAR_FUNCTION	0.010871	0.0028421	6	10	2445	22755
[OVER]	GO:0005484	SNAP receptor activity	MOLECULAR_FUNCTION	0.010871	0.0028421	6	10	2445	22755
[OVER]	GO:0004185	serine-type carboxypeptidase activity	MOLECULAR_FUNCTION	0.010871	0.0028421	6	10	2445	22755
[OVER]	GO:0003697	single-stranded DNA binding	MOLECULAR_FUNCTION	0.0122306	0.00321833	11	34	2440	22731
[OVER]	GO:0006616	SRP-dependent cotranslational protein targeting to membrane, translocation	BIOLOGICAL_PROCESS	0.0125912	0.00340209	3	1	2448	22764
[OVER]	GO:0036091	positive regulation of transcription from RNA polymerase II promoter in response to oxidative stress	BIOLOGICAL_PROCESS	0.0125912	0.00340209	3	1	2448	22764
[OVER]	GO:0019747	regulation of isoprenoid metabolic process	BIOLOGICAL_PROCESS	0.0125912	0.00340209	3	1	2448	22764
[OVER]	GO:0019551	glutamate catabolic process to 2-oxoglutarate	BIOLOGICAL_PROCESS	0.0125912	0.00340209	3	1	2448	22764
[OVER]	GO:0007034	vacuolar transport	BIOLOGICAL_PROCESS	0.0125912	0.00339509	18	72	2433	22693
[OVER]	GO:0051196	regulation of coenzyme metabolic process	BIOLOGICAL_PROCESS	0.0125912	0.00340209	3	1	2448	22764
[OVER]	GO:0060542	regulation of strand invasion	BIOLOGICAL_PROCESS	0.0125912	0.00340209	3	1	2448	22764
[OVER]	GO:0007089	traversing start control point of mitotic cell cycle	BIOLOGICAL_PROCESS	0.0125912	0.00340209	3	1	2448	22764
[OVER]	GO:0045905	positive regulation of translational termination	BIOLOGICAL_PROCESS	0.0125912	0.00340209	3	1	2448	22764
[OVER]	GO:0010847	regulation of chromatin assembly	BIOLOGICAL_PROCESS	0.0125912	0.00340209	3	1	2448	22764
[OVER]	GO:0090465	arginine homeostasis	BIOLOGICAL_PROCESS	0.0125912	0.00340209	3	1	2448	22764
[OVER]	GO:0090463	lysine homeostasis	BIOLOGICAL_PROCESS	0.0125912	0.00340209	3	1	2448	22764
[OVER]	GO:0090464	histidine homeostasis	BIOLOGICAL_PROCESS	0.0125912	0.00340209	3	1	2448	22764
[OVER]	GO:0034396	negative regulation of transcription from RNA polymerase II promoter in response to iron	BIOLOGICAL_PROCESS	0.0125912	0.00340209	3	1	2448	22764
[OVER]	GO:0046084	adenine biosynthetic process	BIOLOGICAL_PROCESS	0.0125912	0.00340209	3	1	2448	22764
[OVER]	GO:0006898	receptor-mediated endocytosis	BIOLOGICAL_PROCESS	0.0125912	0.00340209	3	1	2448	22764
[OVER]	GO:0006422	aspartyl-tRNA aminoacylation	BIOLOGICAL_PROCESS	0.0125912	0.00340209	3	1	2448	22764
[OVER]	GO:0006423	cysteinyl-tRNA aminoacylation	BIOLOGICAL_PROCESS	0.0125912	0.00340209	3	1	2448	22764
[OVER]	GO:0010963	regulation of L-arginine import	BIOLOGICAL_PROCESS	0.0125912	0.00340209	3	1	2448	22764
[OVER]	GO:0006527	arginine catabolic process	BIOLOGICAL_PROCESS	0.0125912	0.00340209	3	1	2448	22764
[OVER]	GO:0000743	nuclear migration involved in conjugation with cellular fusion	BIOLOGICAL_PROCESS	0.0125912	0.00340209	3	1	2448	22764
[OVER]	GO:0015819	lysine transport	BIOLOGICAL_PROCESS	0.0125912	0.00340209	3	1	2448	22764
[OVER]	GO:0004055	argininosuccinate synthase activity	MOLECULAR_FUNCTION	0.0125912	0.00340209	3	1	2448	22764
[OVER]	GO:0019003	GDP binding	MOLECULAR_FUNCTION	0.0125912	0.00340209	3	1	2448	22764
[OVER]	GO:0004815	aspartate-tRNA ligase activity	MOLECULAR_FUNCTION	0.0125912	0.00340209	3	1	2448	22764
[OVER]	GO:0004817	cysteine-tRNA ligase activity	MOLECULAR_FUNCTION	0.0125912	0.00340209	3	1	2448	22764
[OVER]	GO:0003994	aconitate hydratase activity	MOLECULAR_FUNCTION	0.0125912	0.00340209	3	1	2448	22764
[OVER]	GO:0004579	dolichyl-diphosphooligosaccharide-protein glycotransferase activity	MOLECULAR_FUNCTION	0.0125912	0.00340209	3	1	2448	22764
[OVER]	GO:0004106	chorismate mutase activity	MOLECULAR_FUNCTION	0.0125912	0.00340209	3	1	2448	22764
[OVER]	GO:0008553	proton-exporting ATPase activity, phosphorylative mechanism	MOLECULAR_FUNCTION	0.0125912	0.00340209	3	1	2448	22764
[OVER]	GO:0016635	oxidoreductase activity, acting on the CH-CH group of donors, quinone or related compound as acceptor	MOLECULAR_FUNCTION	0.0125912	0.00340209	3	1	2448	22764
[OVER]	GO:0003730	mRNA 3'-UTR binding	MOLECULAR_FUNCTION	0.0125912	0.00340209	3	1	2448	22764
[OVER]	GO:0004617	phosphoglycerate dehydrogenase activity	MOLECULAR_FUNCTION	0.0125912	0.00340209	3	1	2448	22764
[OVER]	GO:0004351	glutamate decarboxylase activity	MOLECULAR_FUNCTION	0.0125912	0.00340209	3	1	2448	22764
[OVER]	GO:0004352	glutamate dehydrogenase (NAD+) activity	MOLECULAR_FUNCTION	0.0125912	0.00340209	3	1	2448	22764
[OVER]	GO:0043023	ribosomal large subunit binding	MOLECULAR_FUNCTION	0.0125912	0.00340209	3	1	2448	22764
[OVER]	GO:0005960	glycine cleavage complex	CELLULAR_COMPONENT	0.0125912	0.00340209	3	1	2448	22764
[OVER]	GO:0030150	protein import into mitochondrial matrix	BIOLOGICAL_PROCESS	0.0137613	0.00372545	7	15	2444	22750
[OVER]	GO:0002161	aminoacyl-tRNA editing activity	MOLECULAR_FUNCTION	0.0140489	0.00381249	5	7	2446	22758
[OVER]	GO:0018580	nitronate monooxygenase activity	MOLECULAR_FUNCTION	0.0140489	0.00381249	5	7	2446	22758
[OVER]	GO:0016514	SWI/SNF complex	CELLULAR_COMPONENT	0.0140489	0.00381249	5	7	2446	22758
[UNDER]	GO:0032259	methylation	BIOLOGICAL_PROCESS	0.0145858	0.00396009	23	383	2428	22382
[OVER]	GO:0000055	ribosomal large subunit export from nucleus	BIOLOGICAL_PROCESS	0.0147958	0.0040345	6	11	2445	22754
[OVER]	GO:0006301	postreplication repair	BIOLOGICAL_PROCESS	0.0147958	0.0040345	6	11	2445	22754
[OVER]	GO:0006283	transcription-coupled nucleotide-excision repair	BIOLOGICAL_PROCESS	0.0147958	0.0040345	6	11	2445	22754
[OVER]	GO:0000049	tRNA binding	MOLECULAR_FUNCTION	0.0147958	0.0040345	6	11	2445	22754
[OVER]	GO:0006760	folic acid-containing compound metabolic process	BIOLOGICAL_PROCESS	0.0151561	0.00413672	8	20	2443	22745
[UNDER]	GO:0008168	methyltransferase activity	MOLECULAR_FUNCTION	0.016094	0.00439691	22	370	2429	22395
[OVER]	GO:0051228	mitotic spindle disassembly	BIOLOGICAL_PROCESS	0.0163966	0.00452031	4	4	2447	22761
[OVER]	GO:0071629	cytoplasm protein quality control by the ubiquitin-proteasome system	BIOLOGICAL_PROCESS	0.0163966	0.00452031	4	4	2447	22761
[OVER]	GO:0031990	mRNA export from nucleus in response to heat stress	BIOLOGICAL_PROCESS	0.0163966	0.00452031	4	4	2447	22761
[OVER]	GO:0004069	L-aspartate:2-oxoglutarate aminotransferase activity	MOLECULAR_FUNCTION	0.0163966	0.00452031	4	4	2447	22761
[OVER]	GO:0070006	metalloaminopeptidase activity	MOLECULAR_FUNCTION	0.0163966	0.00452031	4	4	2447	22761
[OVER]	GO:0008121	ubiquinol-cytochrome-c reductase activity	MOLECULAR_FUNCTION	0.0163966	0.00452031	4	4	2447	22761
[OVER]	GO:0009013	succinate-semialdehyde dehydrogenase [NAD(P)+] activity	MOLECULAR_FUNCTION	0.0163966	0.00452031	4	4	2447	22761
[OVER]	GO:0000837	Doa10p ubiquitin ligase complex	CELLULAR_COMPONENT	0.0163966	0.00452031	4	4	2447	22761
[OVER]	GO:0001671	ATPase activator activity	MOLECULAR_FUNCTION	0.0177837	0.00491202	7	16	2444	22749
[OVER]	GO:0006892	post-Golgi vesicle-mediated transport	BIOLOGICAL_PROCESS	0.017889	0.00494343	12	42	2439	22723
[OVER]	GO:0006348	chromatin silencing at telomere	BIOLOGICAL_PROCESS	0.0183915	0.00508952	14	52	2437	22713
[OVER]	GO:0005816	spindle pole body	CELLULAR_COMPONENT	0.0188555	0.00522286	22	101	2429	22664
[OVER]	GO:0000750	pheromone-dependent signal transduction involved in conjugation with cellular fusion	BIOLOGICAL_PROCESS	0.020023	0.00555984	6	12	2445	22753
[OVER]	GO:0019205	nucleobase-containing compound kinase activity	MOLECULAR_FUNCTION	0.020023	0.00555984	6	12	2445	22753
[UNDER]	GO:0000155	phosphorelay sensor kinase activity	MOLECULAR_FUNCTION	0.020023	0.00556979	0	56	2451	22709
[UNDER]	GO:0009365	protein histidine kinase complex	CELLULAR_COMPONENT	0.020023	0.00556979	0	56	2451	22709
[OVER]	GO:0051315	attachment of mitotic spindle microtubules to kinetochore	BIOLOGICAL_PROCESS	0.0204175	0.00570357	5	8	2446	22757
[OVER]	GO:0017148	negative regulation of translation	BIOLOGICAL_PROCESS	0.0204175	0.00570357	5	8	2446	22757
[OVER]	GO:0008298	intracellular mRNA localization	BIOLOGICAL_PROCESS	0.0204175	0.00570357	5	8	2446	22757
[OVER]	GO:0051015	actin filament binding	MOLECULAR_FUNCTION	0.0204175	0.00570357	5	8	2446	22757
[OVER]	GO:0030687	preribosome, large subunit precursor	CELLULAR_COMPONENT	0.0226822	0.00634805	9	27	2442	22738
[OVER]	GO:0034502	protein localization to chromosome	BIOLOGICAL_PROCESS	0.0227201	0.00636164	7	17	2444	22748
[OVER]	GO:0000136	alpha-1,6-mannosyltransferase complex	CELLULAR_COMPONENT	0.0232998	0.00653916	8	22	2443	22743
[OVER]	GO:0072523	purine-containing compound catabolic process	BIOLOGICAL_PROCESS	0.0264279	0.00751382	4	5	2447	22760
[OVER]	GO:1990116	ribosome-associated ubiquitin-dependent protein catabolic process	BIOLOGICAL_PROCESS	0.0264279	0.00751382	4	5	2447	22760
[OVER]	GO:0000105	histidine biosynthetic process	BIOLOGICAL_PROCESS	0.0264279	0.00751382	4	5	2447	22760
[OVER]	GO:0019287	isopentenyl diphosphate biosynthetic process, mevalonate pathway	BIOLOGICAL_PROCESS	0.0264279	0.00751382	4	5	2447	22760
[OVER]	GO:0031321	ascospore-type prospore assembly	BIOLOGICAL_PROCESS	0.0264279	0.00751382	4	5	2447	22760
[OVER]	GO:0006107	oxaloacetate metabolic process	BIOLOGICAL_PROCESS	0.0264279	0.00751382	4	5	2447	22760
[OVER]	GO:0032790	ribosome disassembly	BIOLOGICAL_PROCESS	0.0264279	0.00751382	4	5	2447	22760
[OVER]	GO:0048309	endoplasmic reticulum inheritance	BIOLOGICAL_PROCESS	0.0264279	0.00751382	4	5	2447	22760
[OVER]	GO:0003400	regulation of COPII vesicle coating	BIOLOGICAL_PROCESS	0.0264279	0.00751382	4	5	2447	22760
[OVER]	GO:0004802	transketolase activity	MOLECULAR_FUNCTION	0.0264279	0.00751382	4	5	2447	22760
[OVER]	GO:0005847	mRNA cleavage and polyadenylation specificity factor complex	CELLULAR_COMPONENT	0.0264279	0.00746692	6	13	2445	22752
[OVER]	GO:1990112	RQC complex	CELLULAR_COMPONENT	0.0264279	0.00751382	4	5	2447	22760
[OVER]	GO:0046540	U4/U6 x U5 tri-snRNP complex	CELLULAR_COMPONENT	0.0269363	0.00767947	9	28	2442	22737
[OVER]	GO:1990263	spore wall assembly MAPK cascade	BIOLOGICAL_PROCESS	0.0273084	0.0078891	3	2	2448	22763
[OVER]	GO:0006075	(1->3)-beta-D-glucan biosynthetic process	BIOLOGICAL_PROCESS	0.0273084	0.0078891	3	2	2448	22763
[OVER]	GO:0033384	geranyl diphosphate biosynthetic process	BIOLOGICAL_PROCESS	0.0273084	0.0078891	3	2	2448	22763
[OVER]	GO:0061136	regulation of proteasomal protein catabolic process	BIOLOGICAL_PROCESS	0.0273084	0.0078891	3	2	2448	22763
[OVER]	GO:0045861	negative regulation of proteolysis	BIOLOGICAL_PROCESS	0.0273084	0.0078891	3	2	2448	22763
[OVER]	GO:0004149	dihydrolipoyllysine-residue succinyltransferase activity	MOLECULAR_FUNCTION	0.0273084	0.0078891	3	2	2448	22763
[OVER]	GO:0004161	dimethylallyltranstransferase activity	MOLECULAR_FUNCTION	0.0273084	0.0078891	3	2	2448	22763
[OVER]	GO:0030943	mitochondrion targeting sequence binding	MOLECULAR_FUNCTION	0.0273084	0.0078891	3	2	2448	22763
[OVER]	GO:0034450	ubiquitin-ubiquitin ligase activity	MOLECULAR_FUNCTION	0.0273084	0.0078891	3	2	2448	22763
[OVER]	GO:0052861	glucan endo-1,3-beta-glucanase activity, C-3 substituted reducing group	MOLECULAR_FUNCTION	0.0273084	0.0078891	3	2	2448	22763
[OVER]	GO:0008266	poly(U) RNA binding	MOLECULAR_FUNCTION	0.0273084	0.0078891	3	2	2448	22763
[OVER]	GO:0043291	RAVE complex	CELLULAR_COMPONENT	0.0273084	0.0078891	3	2	2448	22763
[OVER]	GO:0061617	MICOS complex	CELLULAR_COMPONENT	0.0273084	0.0078891	3	2	2448	22763
[OVER]	GO:0009089	lysine biosynthetic process via diaminopimelate	BIOLOGICAL_PROCESS	0.0281534	0.00817002	5	9	2446	22756
[OVER]	GO:0034501	protein localization to kinetochore	BIOLOGICAL_PROCESS	0.0281534	0.00817002	5	9	2446	22756
[OVER]	GO:0016405	CoA-ligase activity	MOLECULAR_FUNCTION	0.0281534	0.00817002	5	9	2446	22756
[OVER]	GO:0036010	protein localization to endosome	BIOLOGICAL_PROCESS	0.0296713	0.0094444	2	0	2449	22765
[OVER]	GO:0048025	negative regulation of mRNA splicing, via spliceosome	BIOLOGICAL_PROCESS	0.0296713	0.0094444	2	0	2449	22765
[OVER]	GO:0042776	mitochondrial ATP synthesis coupled proton transport	BIOLOGICAL_PROCESS	0.0296713	0.0094444	2	0	2449	22765
[OVER]	GO:0006657	CDP-choline pathway	BIOLOGICAL_PROCESS	0.0296713	0.0094444	2	0	2449	22765
[OVER]	GO:0007107	membrane addition at site of cytokinesis	BIOLOGICAL_PROCESS	0.0296713	0.0094444	2	0	2449	22765
[OVER]	GO:0006217	deoxycytidine catabolic process	BIOLOGICAL_PROCESS	0.0296713	0.0094444	2	0	2449	22765
[OVER]	GO:0016031	tRNA import into mitochondrion	BIOLOGICAL_PROCESS	0.0296713	0.0094444	2	0	2449	22765
[OVER]	GO:0042769	DNA damage response, detection of DNA damage	BIOLOGICAL_PROCESS	0.0296713	0.0094444	2	0	2449	22765
[OVER]	GO:1903479	mitotic actomyosin contractile ring assembly actin filament organization	BIOLOGICAL_PROCESS	0.0296713	0.0094444	2	0	2449	22765
[OVER]	GO:0031107	septin ring disassembly	BIOLOGICAL_PROCESS	0.0296713	0.0094444	2	0	2449	22765
[OVER]	GO:0031142	induction of conjugation upon nitrogen starvation	BIOLOGICAL_PROCESS	0.0296713	0.0094444	2	0	2449	22765
[OVER]	GO:0034643	establishment of mitochondrion localization, microtubule-mediated	BIOLOGICAL_PROCESS	0.0296713	0.0094444	2	0	2449	22765
[OVER]	GO:0006190	inosine salvage	BIOLOGICAL_PROCESS	0.0296713	0.0094444	2	0	2449	22765
[OVER]	GO:1902906	proteasome storage granule assembly	BIOLOGICAL_PROCESS	0.0296713	0.0094444	2	0	2449	22765
[OVER]	GO:0090368	regulation of ornithine metabolic process	BIOLOGICAL_PROCESS	0.0296713	0.0094444	2	0	2449	22765
[OVER]	GO:0000492	box C/D snoRNP assembly	BIOLOGICAL_PROCESS	0.0296713	0.0094444	2	0	2449	22765
[OVER]	GO:0070778	L-aspartate transmembrane transport	BIOLOGICAL_PROCESS	0.0296713	0.0094444	2	0	2449	22765
[OVER]	GO:1900264	positive regulation of DNA-directed DNA polymerase activity	BIOLOGICAL_PROCESS	0.0296713	0.0094444	2	0	2449	22765
[OVER]	GO:1903790	guanine nucleotide transmembrane transport	BIOLOGICAL_PROCESS	0.0296713	0.0094444	2	0	2449	22765
[OVER]	GO:0070903	mitochondrial tRNA thio-modification	BIOLOGICAL_PROCESS	0.0296713	0.0094444	2	0	2449	22765
[OVER]	GO:1990145	maintenance of translational fidelity	BIOLOGICAL_PROCESS	0.0296713	0.0094444	2	0	2449	22765
[OVER]	GO:0071701	regulation of MAPK export from nucleus	BIOLOGICAL_PROCESS	0.0296713	0.0094444	2	0	2449	22765
[OVER]	GO:0010793	regulation of mRNA export from nucleus	BIOLOGICAL_PROCESS	0.0296713	0.0094444	2	0	2449	22765
[OVER]	GO:1990507	ATP-independent chaperone mediated protein folding	BIOLOGICAL_PROCESS	0.0296713	0.0094444	2	0	2449	22765
[OVER]	GO:2000100	regulation of establishment or maintenance of bipolar cell polarity regulating cell shape	BIOLOGICAL_PROCESS	0.0296713	0.0094444	2	0	2449	22765
[OVER]	GO:0005980	glycogen catabolic process	BIOLOGICAL_PROCESS	0.0296713	0.0094444	2	0	2449	22765
[OVER]	GO:0048205	COPI coating of Golgi vesicle	BIOLOGICAL_PROCESS	0.0296713	0.0094444	2	0	2449	22765
[OVER]	GO:0070143	mitochondrial alanyl-tRNA aminoacylation	BIOLOGICAL_PROCESS	0.0296713	0.0094444	2	0	2449	22765
[OVER]	GO:0036258	multivesicular body assembly	BIOLOGICAL_PROCESS	0.0296713	0.0094444	2	0	2449	22765
[OVER]	GO:0006438	valyl-tRNA aminoacylation	BIOLOGICAL_PROCESS	0.0296713	0.0094444	2	0	2449	22765
[OVER]	GO:0097248	maintenance of protein location in cell cortex of cell tip	BIOLOGICAL_PROCESS	0.0296713	0.0094444	2	0	2449	22765
[OVER]	GO:0006452	translational frameshifting	BIOLOGICAL_PROCESS	0.0296713	0.0094444	2	0	2449	22765
[OVER]	GO:0051016	barbed-end actin filament capping	BIOLOGICAL_PROCESS	0.0296713	0.0094444	2	0	2449	22765
[OVER]	GO:0006426	glycyl-tRNA aminoacylation	BIOLOGICAL_PROCESS	0.0296713	0.0094444	2	0	2449	22765
[OVER]	GO:0006002	fructose 6-phosphate metabolic process	BIOLOGICAL_PROCESS	0.0296713	0.0094444	2	0	2449	22765
[OVER]	GO:0071050	snoRNA polyadenylation	BIOLOGICAL_PROCESS	0.0296713	0.0094444	2	0	2449	22765
[OVER]	GO:0009972	cytidine deamination	BIOLOGICAL_PROCESS	0.0296713	0.0094444	2	0	2449	22765
[OVER]	GO:0046855	inositol phosphate dephosphorylation	BIOLOGICAL_PROCESS	0.0296713	0.0094444	2	0	2449	22765
[OVER]	GO:1990417	snoRNA release from pre-rRNA	BIOLOGICAL_PROCESS	0.0296713	0.0094444	2	0	2449	22765
[OVER]	GO:0019280	L-methionine biosynthetic process from homoserine via O-acetyl-L-homoserine and cystathionine	BIOLOGICAL_PROCESS	0.0296713	0.0094444	2	0	2449	22765
[OVER]	GO:0043335	protein unfolding	BIOLOGICAL_PROCESS	0.0296713	0.0094444	2	0	2449	22765
[OVER]	GO:1990809	endoplasmic reticulum tubular network membrane organization	BIOLOGICAL_PROCESS	0.0296713	0.0094444	2	0	2449	22765
[OVER]	GO:0032264	IMP salvage	BIOLOGICAL_PROCESS	0.0296713	0.0094444	2	0	2449	22765
[OVER]	GO:0090149	mitochondrial membrane fission	BIOLOGICAL_PROCESS	0.0296713	0.0094444	2	0	2449	22765
[OVER]	GO:0071846	actin filament debranching	BIOLOGICAL_PROCESS	0.0296713	0.0094444	2	0	2449	22765
[OVER]	GO:1900034	regulation of cellular response to heat	BIOLOGICAL_PROCESS	0.0296713	0.0094444	2	0	2449	22765
[OVER]	GO:0035494	SNARE complex disassembly	BIOLOGICAL_PROCESS	0.0296713	0.0094444	2	0	2449	22765
[OVER]	GO:0071574	protein localization to medial cortex	BIOLOGICAL_PROCESS	0.0296713	0.0094444	2	0	2449	22765
[OVER]	GO:0071592	nicotinic acid riboside biosynthetic process	BIOLOGICAL_PROCESS	0.0296713	0.0094444	2	0	2449	22765
[OVER]	GO:0071590	nicotinamide riboside biosynthetic process	BIOLOGICAL_PROCESS	0.0296713	0.0094444	2	0	2449	22765
[OVER]	GO:0006556	S-adenosylmethionine biosynthetic process	BIOLOGICAL_PROCESS	0.0296713	0.0094444	2	0	2449	22765
[OVER]	GO:0051091	positive regulation of DNA-binding transcription factor activity	BIOLOGICAL_PROCESS	0.0296713	0.0094444	2	0	2449	22765
[OVER]	GO:0033621	nuclear-transcribed mRNA catabolic process, meiosis-specific transcripts	BIOLOGICAL_PROCESS	0.0296713	0.0094444	2	0	2449	22765
[OVER]	GO:0051084	'de novo' posttranslational protein folding	BIOLOGICAL_PROCESS	0.0296713	0.0094444	2	0	2449	22765
[OVER]	GO:1903940	negative regulation of TORC2 signaling	BIOLOGICAL_PROCESS	0.0296713	0.0094444	2	0	2449	22765
[OVER]	GO:0043096	purine nucleobase salvage	BIOLOGICAL_PROCESS	0.0296713	0.0094444	2	0	2449	22765
[OVER]	GO:0048313	Golgi inheritance	BIOLOGICAL_PROCESS	0.0296713	0.0094444	2	0	2449	22765
[OVER]	GO:0048312	intracellular distribution of mitochondria	BIOLOGICAL_PROCESS	0.0296713	0.0094444	2	0	2449	22765
[OVER]	GO:0015813	L-glutamate transmembrane transport	BIOLOGICAL_PROCESS	0.0296713	0.0094444	2	0	2449	22765
[OVER]	GO:1901710	regulation of homoserine biosynthetic process	BIOLOGICAL_PROCESS	0.0296713	0.0094444	2	0	2449	22765
[OVER]	GO:0050334	thiaminase activity	MOLECULAR_FUNCTION	0.0296713	0.0094444	2	0	2449	22765
[OVER]	GO:0048027	mRNA 5'-UTR binding	MOLECULAR_FUNCTION	0.0296713	0.0094444	2	0	2449	22765
[OVER]	GO:0004463	leukotriene-A4 hydrolase activity	MOLECULAR_FUNCTION	0.0296713	0.0094444	2	0	2449	22765
[OVER]	GO:0005313	L-glutamate transmembrane transporter activity	MOLECULAR_FUNCTION	0.0296713	0.0094444	2	0	2449	22765
[OVER]	GO:0004478	methionine adenosyltransferase activity	MOLECULAR_FUNCTION	0.0296713	0.0094444	2	0	2449	22765
[OVER]	GO:0004449	isocitrate dehydrogenase (NAD+) activity	MOLECULAR_FUNCTION	0.0296713	0.0094444	2	0	2449	22765
[OVER]	GO:2001070	starch binding	MOLECULAR_FUNCTION	0.0296713	0.0094444	2	0	2449	22765
[OVER]	GO:0004001	adenosine kinase activity	MOLECULAR_FUNCTION	0.0296713	0.0094444	2	0	2449	22765
[OVER]	GO:0016040	glutamate synthase (NADH) activity	MOLECULAR_FUNCTION	0.0296713	0.0094444	2	0	2449	22765
[OVER]	GO:0015183	L-aspartate transmembrane transporter activity	MOLECULAR_FUNCTION	0.0296713	0.0094444	2	0	2449	22765
[OVER]	GO:0004053	arginase activity	MOLECULAR_FUNCTION	0.0296713	0.0094444	2	0	2449	22765
[OVER]	GO:0003938	IMP dehydrogenase activity	MOLECULAR_FUNCTION	0.0296713	0.0094444	2	0	2449	22765
[OVER]	GO:0004820	glycine-tRNA ligase activity	MOLECULAR_FUNCTION	0.0296713	0.0094444	2	0	2449	22765
[OVER]	GO:0004807	triose-phosphate isomerase activity	MOLECULAR_FUNCTION	0.0296713	0.0094444	2	0	2449	22765
[OVER]	GO:0004854	xanthine dehydrogenase activity	MOLECULAR_FUNCTION	0.0296713	0.0094444	2	0	2449	22765
[OVER]	GO:0004855	xanthine oxidase activity	MOLECULAR_FUNCTION	0.0296713	0.0094444	2	0	2449	22765
[OVER]	GO:0003991	acetylglutamate kinase activity	MOLECULAR_FUNCTION	0.0296713	0.0094444	2	0	2449	22765
[OVER]	GO:0004832	valine-tRNA ligase activity	MOLECULAR_FUNCTION	0.0296713	0.0094444	2	0	2449	22765
[OVER]	GO:0003984	acetolactate synthase activity	MOLECULAR_FUNCTION	0.0296713	0.0094444	2	0	2449	22765
[OVER]	GO:0070300	phosphatidic acid binding	MOLECULAR_FUNCTION	0.0296713	0.0094444	2	0	2449	22765
[OVER]	GO:0004582	dolichyl-phosphate beta-D-mannosyltransferase activity	MOLECULAR_FUNCTION	0.0296713	0.0094444	2	0	2449	22765
[OVER]	GO:0004585	ornithine carbamoyltransferase activity	MOLECULAR_FUNCTION	0.0296713	0.0094444	2	0	2449	22765
[OVER]	GO:0008934	inositol monophosphate 1-phosphatase activity	MOLECULAR_FUNCTION	0.0296713	0.0094444	2	0	2449	22765
[OVER]	GO:0004105	choline-phosphate cytidylyltransferase activity	MOLECULAR_FUNCTION	0.0296713	0.0094444	2	0	2449	22765
[OVER]	GO:0004108	citrate (Si)-synthase activity	MOLECULAR_FUNCTION	0.0296713	0.0094444	2	0	2449	22765
[OVER]	GO:0004148	dihydrolipoyl dehydrogenase activity	MOLECULAR_FUNCTION	0.0296713	0.0094444	2	0	2449	22765
[OVER]	GO:0004123	cystathionine gamma-lyase activity	MOLECULAR_FUNCTION	0.0296713	0.0094444	2	0	2449	22765
[OVER]	GO:0004126	cytidine deaminase activity	MOLECULAR_FUNCTION	0.0296713	0.0094444	2	0	2449	22765
[OVER]	GO:0008972	phosphomethylpyrimidine kinase activity	MOLECULAR_FUNCTION	0.0296713	0.0094444	2	0	2449	22765
[OVER]	GO:0004135	amylo-alpha-1,6-glucosidase activity	MOLECULAR_FUNCTION	0.0296713	0.0094444	2	0	2449	22765
[OVER]	GO:0004134	4-alpha-glucanotransferase activity	MOLECULAR_FUNCTION	0.0296713	0.0094444	2	0	2449	22765
[OVER]	GO:0052657	guanine phosphoribosyltransferase activity	MOLECULAR_FUNCTION	0.0296713	0.0094444	2	0	2449	22765
[OVER]	GO:0050483	IMP 5'-nucleotidase activity	MOLECULAR_FUNCTION	0.0296713	0.0094444	2	0	2449	22765
[OVER]	GO:0015292	uniporter activity	MOLECULAR_FUNCTION	0.0296713	0.0094444	2	0	2449	22765
[OVER]	GO:0008441	3'(2'),5'-bisphosphate nucleotidase activity	MOLECULAR_FUNCTION	0.0296713	0.0094444	2	0	2449	22765
[OVER]	GO:0004092	carnitine O-acetyltransferase activity	MOLECULAR_FUNCTION	0.0296713	0.0094444	2	0	2449	22765
[OVER]	GO:0001409	guanine nucleotide transmembrane transporter activity	MOLECULAR_FUNCTION	0.0296713	0.0094444	2	0	2449	22765
[OVER]	GO:0009374	biotin binding	MOLECULAR_FUNCTION	0.0296713	0.0094444	2	0	2449	22765
[OVER]	GO:0019171	3-hydroxyacyl-[acyl-carrier-protein] dehydratase activity	MOLECULAR_FUNCTION	0.0296713	0.0094444	2	0	2449	22765
[OVER]	GO:0043812	phosphatidylinositol-4-phosphate phosphatase activity	MOLECULAR_FUNCTION	0.0296713	0.0094444	2	0	2449	22765
[OVER]	GO:0005528	FK506 binding	MOLECULAR_FUNCTION	0.0296713	0.0094444	2	0	2449	22765
[OVER]	GO:0004691	cAMP-dependent protein kinase activity	MOLECULAR_FUNCTION	0.0296713	0.0094444	2	0	2449	22765
[OVER]	GO:0047386	fructose-2,6-bisphosphate 6-phosphatase activity	MOLECULAR_FUNCTION	0.0296713	0.0094444	2	0	2449	22765
[OVER]	GO:0008184	glycogen phosphorylase activity	MOLECULAR_FUNCTION	0.0296713	0.0094444	2	0	2449	22765
[OVER]	GO:0045153	electron transporter, transferring electrons within CoQH2-cytochrome c reductase complex activity	MOLECULAR_FUNCTION	0.0296713	0.0094444	2	0	2449	22765
[OVER]	GO:0033592	RNA strand annealing activity	MOLECULAR_FUNCTION	0.0296713	0.0094444	2	0	2449	22765
[OVER]	GO:0004619	phosphoglycerate mutase activity	MOLECULAR_FUNCTION	0.0296713	0.0094444	2	0	2449	22765
[OVER]	GO:0047770	carboxylate reductase activity	MOLECULAR_FUNCTION	0.0296713	0.0094444	2	0	2449	22765
[OVER]	GO:0004781	sulfate adenylyltransferase (ATP) activity	MOLECULAR_FUNCTION	0.0296713	0.0094444	2	0	2449	22765
[OVER]	GO:0004783	sulfite reductase (NADPH) activity	MOLECULAR_FUNCTION	0.0296713	0.0094444	2	0	2449	22765
[OVER]	GO:0004310	farnesyl-diphosphate farnesyltransferase activity	MOLECULAR_FUNCTION	0.0296713	0.0094444	2	0	2449	22765
[OVER]	GO:0004313	[acyl-carrier-protein] S-acetyltransferase activity	MOLECULAR_FUNCTION	0.0296713	0.0094444	2	0	2449	22765
[OVER]	GO:0004339	glucan 1,4-alpha-glucosidase activity	MOLECULAR_FUNCTION	0.0296713	0.0094444	2	0	2449	22765
[OVER]	GO:0030627	pre-mRNA 5'-splice site binding	MOLECULAR_FUNCTION	0.0296713	0.0094444	2	0	2449	22765
[OVER]	GO:0004314	[acyl-carrier-protein] S-malonyltransferase activity	MOLECULAR_FUNCTION	0.0296713	0.0094444	2	0	2449	22765
[OVER]	GO:0004319	enoyl-[acyl-carrier-protein] reductase (NADPH, B-specific) activity	MOLECULAR_FUNCTION	0.0296713	0.0094444	2	0	2449	22765
[OVER]	GO:0004318	enoyl-[acyl-carrier-protein] reductase (NADH) activity	MOLECULAR_FUNCTION	0.0296713	0.0094444	2	0	2449	22765
[OVER]	GO:0004332	fructose-bisphosphate aldolase activity	MOLECULAR_FUNCTION	0.0296713	0.0094444	2	0	2449	22765
[OVER]	GO:0004329	formate-tetrahydrofolate ligase activity	MOLECULAR_FUNCTION	0.0296713	0.0094444	2	0	2449	22765
[OVER]	GO:0051996	squalene synthase activity	MOLECULAR_FUNCTION	0.0296713	0.0094444	2	0	2449	22765
[OVER]	GO:0004360	glutamine-fructose-6-phosphate transaminase (isomerizing) activity	MOLECULAR_FUNCTION	0.0296713	0.0094444	2	0	2449	22765
[OVER]	GO:0004373	glycogen (starch) synthase activity	MOLECULAR_FUNCTION	0.0296713	0.0094444	2	0	2449	22765
[OVER]	GO:0000822	inositol hexakisphosphate binding	MOLECULAR_FUNCTION	0.0296713	0.0094444	2	0	2449	22765
[OVER]	GO:0071933	Arp2/3 complex binding	MOLECULAR_FUNCTION	0.0296713	0.0094444	2	0	2449	22765
[OVER]	GO:0031489	myosin V binding	MOLECULAR_FUNCTION	0.0296713	0.0094444	2	0	2449	22765
[OVER]	GO:0003844	1,4-alpha-glucan branching enzyme activity	MOLECULAR_FUNCTION	0.0296713	0.0094444	2	0	2449	22765
[OVER]	GO:0031071	cysteine desulfurase activity	MOLECULAR_FUNCTION	0.0296713	0.0094444	2	0	2449	22765
[OVER]	GO:0004742	dihydrolipoyllysine-residue acetyltransferase activity	MOLECULAR_FUNCTION	0.0296713	0.0094444	2	0	2449	22765
[OVER]	GO:0004736	pyruvate carboxylase activity	MOLECULAR_FUNCTION	0.0296713	0.0094444	2	0	2449	22765
[OVER]	GO:0004739	pyruvate dehydrogenase (acetyl-transferring) activity	MOLECULAR_FUNCTION	0.0296713	0.0094444	2	0	2449	22765
[OVER]	GO:0004748	ribonucleoside-diphosphate reductase activity, thioredoxin disulfide as acceptor	MOLECULAR_FUNCTION	0.0296713	0.0094444	2	0	2449	22765
[OVER]	GO:0003872	6-phosphofructokinase activity	MOLECULAR_FUNCTION	0.0296713	0.0094444	2	0	2449	22765
[OVER]	GO:0003876	AMP deaminase activity	MOLECULAR_FUNCTION	0.0296713	0.0094444	2	0	2449	22765
[OVER]	GO:0043626	PCNA complex	CELLULAR_COMPONENT	0.0296713	0.0094444	2	0	2449	22765
[OVER]	GO:0016460	myosin II complex	CELLULAR_COMPONENT	0.0296713	0.0094444	2	0	2449	22765
[OVER]	GO:0031105	septin complex	CELLULAR_COMPONENT	0.0296713	0.0094444	2	0	2449	22765
[OVER]	GO:0000838	Hrd1p ubiquitin ligase ERAD-M complex	CELLULAR_COMPONENT	0.0296713	0.0094444	2	0	2449	22765
[OVER]	GO:1990221	L-cysteine desulfurase complex	CELLULAR_COMPONENT	0.0296713	0.0094444	2	0	2449	22765
[OVER]	GO:0035101	FACT complex	CELLULAR_COMPONENT	0.0296713	0.0094444	2	0	2449	22765
[OVER]	GO:0009345	glycine-tRNA ligase complex	CELLULAR_COMPONENT	0.0296713	0.0094444	2	0	2449	22765
[OVER]	GO:0009349	riboflavin synthase complex	CELLULAR_COMPONENT	0.0296713	0.0094444	2	0	2449	22765
[OVER]	GO:0009348	ornithine carbamoyltransferase complex	CELLULAR_COMPONENT	0.0296713	0.0094444	2	0	2449	22765
[OVER]	GO:0000148	1,3-beta-D-glucan synthase complex	CELLULAR_COMPONENT	0.0296713	0.0094444	2	0	2449	22765
[OVER]	GO:0005971	ribonucleoside-diphosphate reductase complex	CELLULAR_COMPONENT	0.0296713	0.0094444	2	0	2449	22765
[OVER]	GO:0097255	R2TP complex	CELLULAR_COMPONENT	0.0296713	0.0094444	2	0	2449	22765
[OVER]	GO:0005945	6-phosphofructokinase complex	CELLULAR_COMPONENT	0.0296713	0.0094444	2	0	2449	22765
[OVER]	GO:0005948	acetolactate synthase complex	CELLULAR_COMPONENT	0.0296713	0.0094444	2	0	2449	22765
[OVER]	GO:0005962	mitochondrial isocitrate dehydrogenase complex (NAD+)	CELLULAR_COMPONENT	0.0296713	0.0094444	2	0	2449	22765
[OVER]	GO:0005619	ascospore wall	CELLULAR_COMPONENT	0.0296713	0.0094444	2	0	2449	22765
[OVER]	GO:0030121	AP-1 adaptor complex	CELLULAR_COMPONENT	0.0296713	0.0094444	2	0	2449	22765
[OVER]	GO:0008290	F-actin capping protein complex	CELLULAR_COMPONENT	0.0296713	0.0094444	2	0	2449	22765
[OVER]	GO:0006026	aminoglycan catabolic process	BIOLOGICAL_PROCESS	0.0309411	0.00988499	10	35	2441	22730
[OVER]	GO:0006928	movement of cell or subcellular component	BIOLOGICAL_PROCESS	0.0319347	0.0102066	13	52	2438	22713
[OVER]	GO:0000920	septum digestion after cytokinesis	BIOLOGICAL_PROCESS	0.0352603	0.0112879	5	10	2446	22755
[OVER]	GO:0032889	regulation of vacuole fusion, non-autophagic	BIOLOGICAL_PROCESS	0.0352603	0.0112879	5	10	2446	22755
[OVER]	GO:0031571	mitotic G1 DNA damage checkpoint	BIOLOGICAL_PROCESS	0.0358051	0.0115682	4	6	2447	22759
[OVER]	GO:0015940	pantothenate biosynthetic process	BIOLOGICAL_PROCESS	0.0358051	0.0115887	12	46	2439	22719
[OVER]	GO:0000032	cell wall mannoprotein biosynthetic process	BIOLOGICAL_PROCESS	0.0358051	0.0115682	4	6	2447	22759
[OVER]	GO:0006337	nucleosome disassembly	BIOLOGICAL_PROCESS	0.0358051	0.0115682	4	6	2447	22759
[OVER]	GO:0009821	alkaloid biosynthetic process	BIOLOGICAL_PROCESS	0.0358051	0.0115682	4	6	2447	22759
[OVER]	GO:0008320	protein transmembrane transporter activity	MOLECULAR_FUNCTION	0.0358051	0.0115682	4	6	2447	22759
[OVER]	GO:0005793	endoplasmic reticulum-Golgi intermediate compartment	CELLULAR_COMPONENT	0.0358051	0.0115682	4	6	2447	22759
[OVER]	GO:0030176	integral component of endoplasmic reticulum membrane	CELLULAR_COMPONENT	0.0358051	0.0115573	10	36	2441	22729
[OVER]	GO:0005096	GTPase activator activity	MOLECULAR_FUNCTION	0.0389284	0.0126148	7	20	2444	22745
[OVER]	GO:0031124	mRNA 3'-end processing	BIOLOGICAL_PROCESS	0.0399651	0.0129612	9	31	2442	22734
[OVER]	GO:0008017	microtubule binding	MOLECULAR_FUNCTION	0.0399651	0.0129612	9	31	2442	22734
[UNDER]	GO:0000160	phosphorelay signal transduction system	BIOLOGICAL_PROCESS	0.0406133	0.0131768	1	68	2450	22697
[OVER]	GO:0030245	cellulose catabolic process	BIOLOGICAL_PROCESS	0.0438358	0.0143197	8	26	2443	22739
[OVER]	GO:0006869	lipid transport	BIOLOGICAL_PROCESS	0.0438358	0.0143197	8	26	2443	22739
[OVER]	GO:0003688	DNA replication origin binding	MOLECULAR_FUNCTION	0.0438358	0.0143197	8	26	2443	22739
[OVER]	GO:0046809	replication compartment	CELLULAR_COMPONENT	0.0438358	0.0143197	8	26	2443	22739
[OVER]	GO:0010962	regulation of glucan biosynthetic process	BIOLOGICAL_PROCESS	0.0441838	0.0146413	3	3	2448	22762
[OVER]	GO:0007105	cytokinesis, site selection	BIOLOGICAL_PROCESS	0.0441838	0.0146413	3	3	2448	22762
[OVER]	GO:0009826	unidimensional cell growth	BIOLOGICAL_PROCESS	0.0441838	0.0146413	3	3	2448	22762
[OVER]	GO:0009306	protein secretion	BIOLOGICAL_PROCESS	0.0441838	0.0146413	3	3	2448	22762
[OVER]	GO:0006972	hyperosmotic response	BIOLOGICAL_PROCESS	0.0441838	0.0146413	3	3	2448	22762
[OVER]	GO:0006535	cysteine biosynthetic process from serine	BIOLOGICAL_PROCESS	0.0441838	0.0146413	3	3	2448	22762
[OVER]	GO:0006037	cell wall chitin metabolic process	BIOLOGICAL_PROCESS	0.0441838	0.0146413	3	3	2448	22762
[OVER]	GO:0006083	acetate metabolic process	BIOLOGICAL_PROCESS	0.0441838	0.0146413	3	3	2448	22762
[OVER]	GO:0042177	negative regulation of protein catabolic process	BIOLOGICAL_PROCESS	0.0441838	0.0146413	3	3	2448	22762
[OVER]	GO:0016857	racemase and epimerase activity, acting on carbohydrates and derivatives	MOLECULAR_FUNCTION	0.0441838	0.0146413	3	3	2448	22762
[OVER]	GO:0070330	aromatase activity	MOLECULAR_FUNCTION	0.0441838	0.0146413	3	3	2448	22762
[OVER]	GO:0004563	beta-N-acetylhexosaminidase activity	MOLECULAR_FUNCTION	0.0441838	0.0146413	3	3	2448	22762
[OVER]	GO:0016671	oxidoreductase activity, acting on a sulfur group of donors, disulfide as acceptor	MOLECULAR_FUNCTION	0.0441838	0.0146413	3	3	2448	22762
[OVER]	GO:0005545	1-phosphatidylinositol binding	MOLECULAR_FUNCTION	0.0441838	0.0146413	3	3	2448	22762
[OVER]	GO:0004337	geranyltranstransferase activity	MOLECULAR_FUNCTION	0.0441838	0.0146413	3	3	2448	22762
[OVER]	GO:0042720	mitochondrial inner membrane peptidase complex	CELLULAR_COMPONENT	0.0441838	0.0146413	3	3	2448	22762
[OVER]	GO:0043224	nuclear SCF ubiquitin ligase complex	CELLULAR_COMPONENT	0.0441838	0.0146413	3	3	2448	22762
[OVER]	GO:0007007	inner mitochondrial membrane organization	BIOLOGICAL_PROCESS	0.0455415	0.0151269	5	11	2446	22754
[OVER]	GO:0016790	thiolester hydrolase activity	MOLECULAR_FUNCTION	0.0455415	0.0151269	5	11	2446	22754
[OVER]	GO:0031234	extrinsic component of cytoplasmic side of plasma membrane	CELLULAR_COMPONENT	0.0455415	0.0151269	5	11	2446	22754
[OVER]	GO:0031201	SNARE complex	CELLULAR_COMPONENT	0.0455415	0.0151269	5	11	2446	22754
[OVER]	GO:0071004	U2-type prespliceosome	CELLULAR_COMPONENT	0.0464318	0.0154409	7	21	2444	22744
[OVER]	GO:0043547	positive regulation of GTPase activity	BIOLOGICAL_PROCESS	0.0472977	0.015735	14	60	2437	22705
[OVER]	GO:0005319	lipid transporter activity	MOLECULAR_FUNCTION	0.0479318	0.0159522	6	16	2445	22749
